# Supplementary material
Source: PubMed Central journal article supplement (PMC3625679)
Supplement: NIHMS415406-supplement-3.pdf [file NIHMS415406-supplement-3.pdf]

# AAPGALPEAAVGPR Sf: .81

32238am562kerlic-te08n1 #5610 RT: 70.64 AV: 1 NL: 5.61E3  
 T: ITMS + c NSI d Full ms2 638.85@cid35.00 [165.00-1290.00]

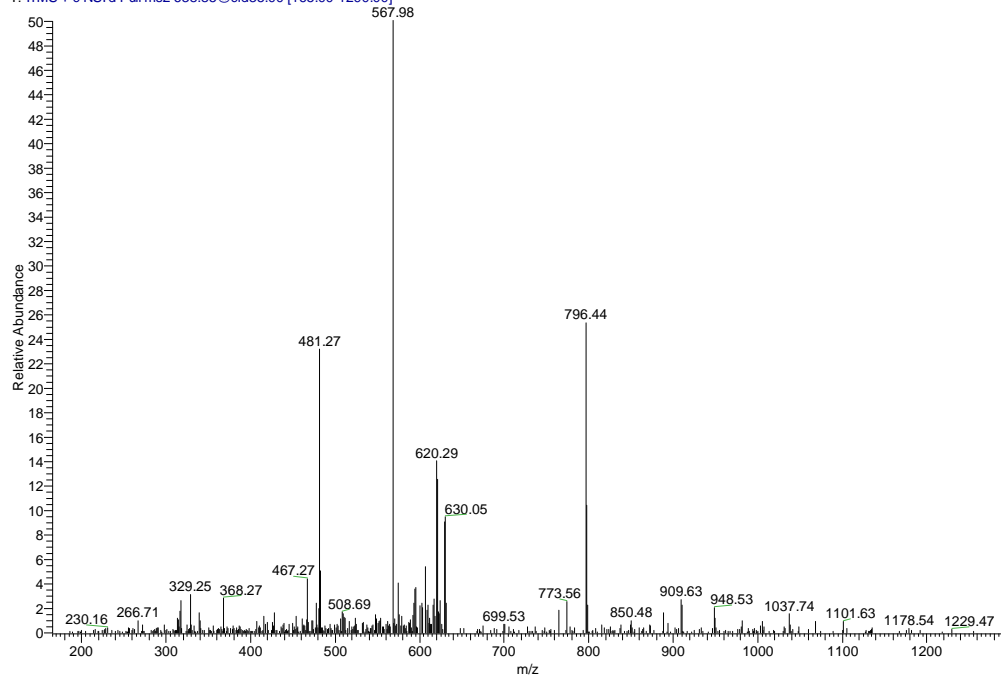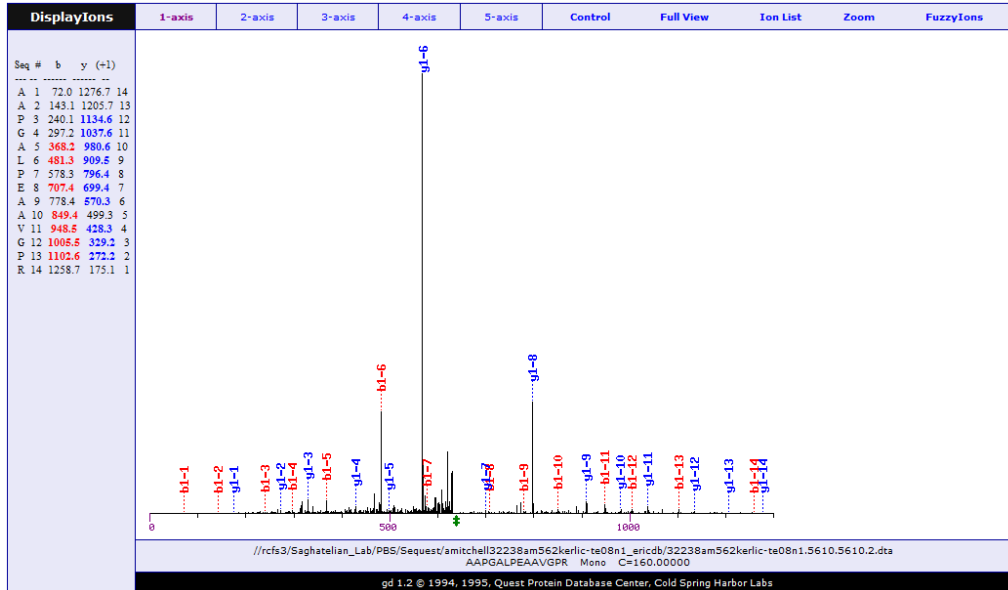

# AGAPAVGLLLANER Sf: .93

32375562k10kda2-e07ft#14005 RT: 133.99 AV: 1 NL: 4.14E3  
 T: ITMS + c NSI d Full ms2 676.39@cid35.00 [175.00-1365.00]

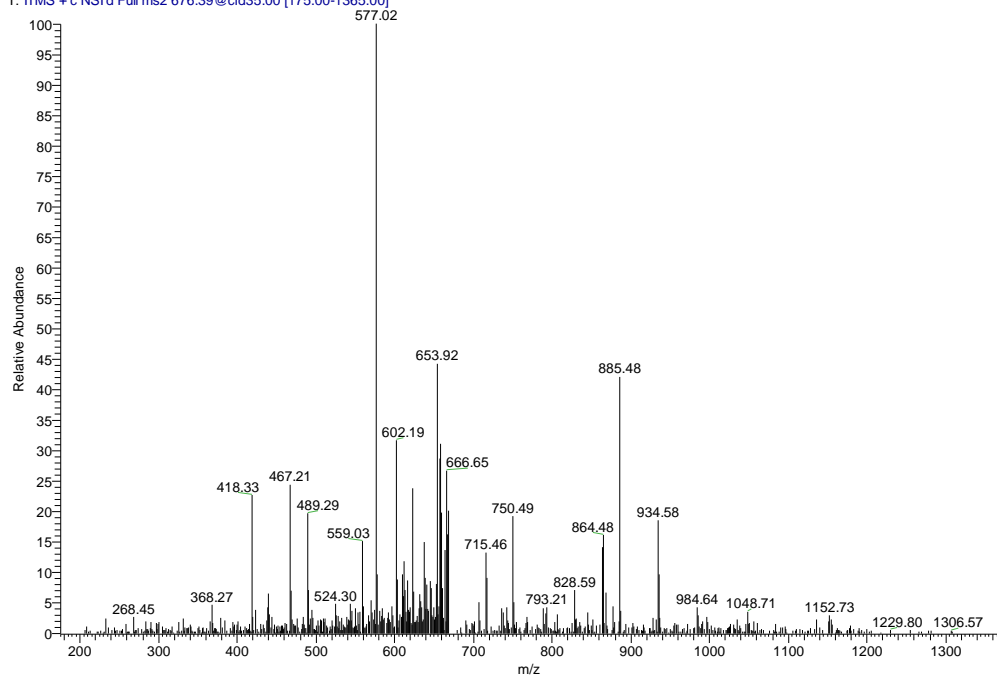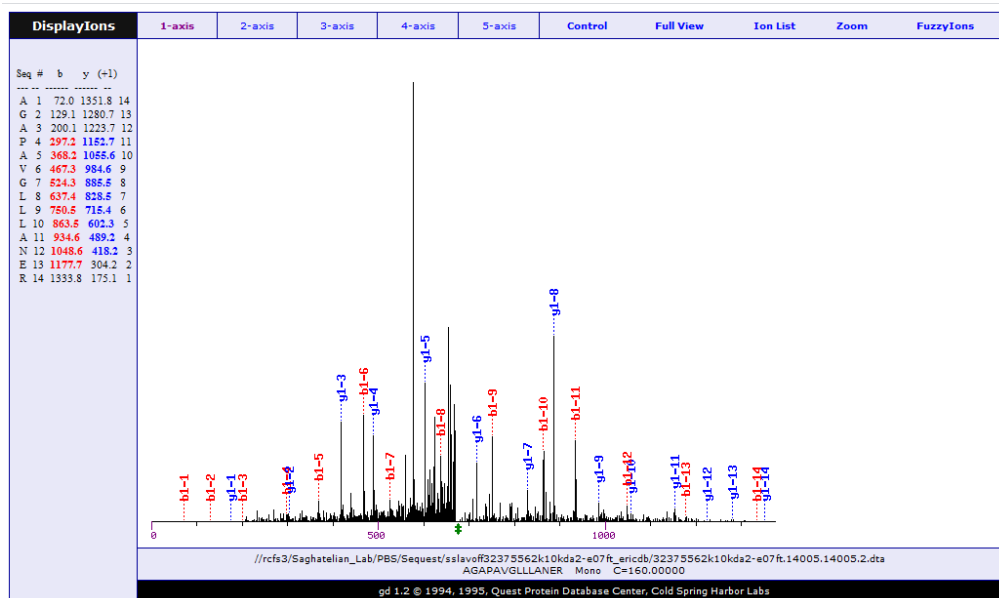

APGGAAAGPGAPGCGGAGGQGPAPGGAAAAAAR Sf: .98

32375562k10kda2-e14ft#8767 RT: 80.12 AV: 1 NL: 1.43E4  
 T: ITMS + c NSI d Full ms2 852.74@cid35.00 [220.00-2000.00]

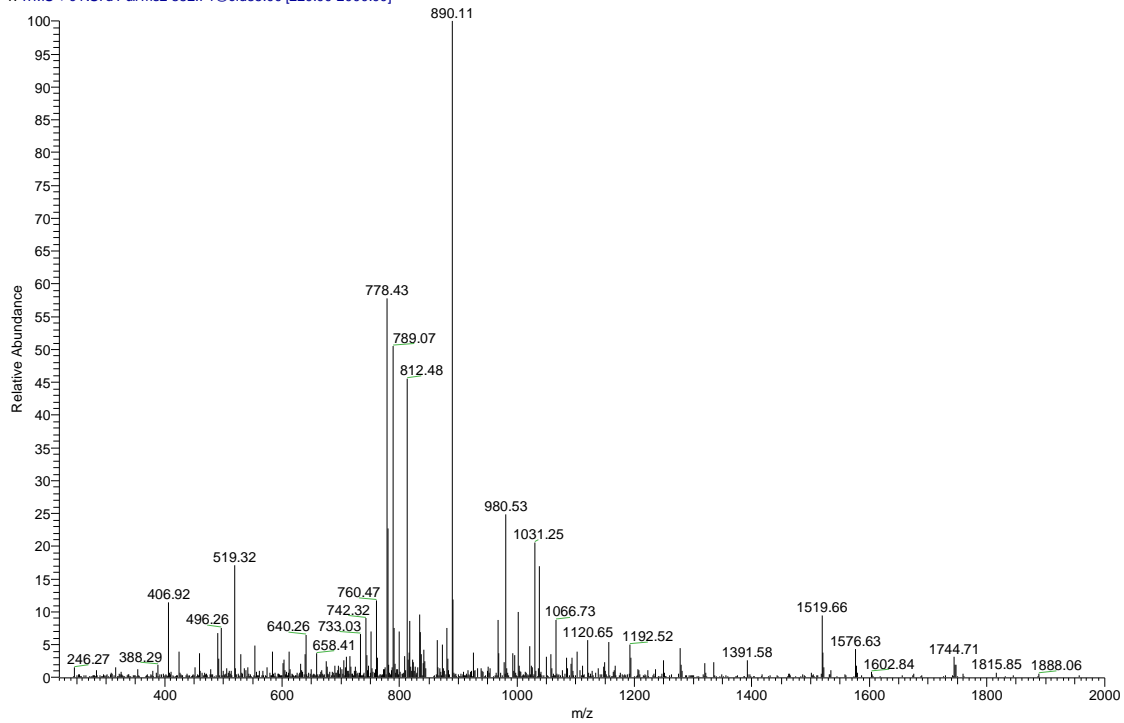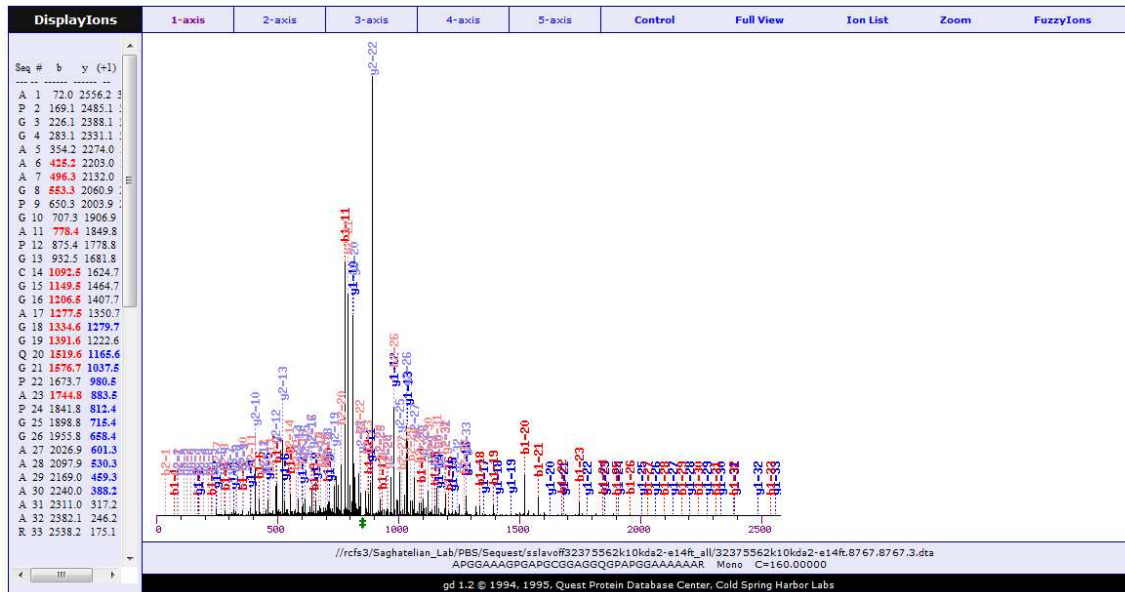

ATPPGGTGHEGLSSGAADVASGVGSGR Sf: .95

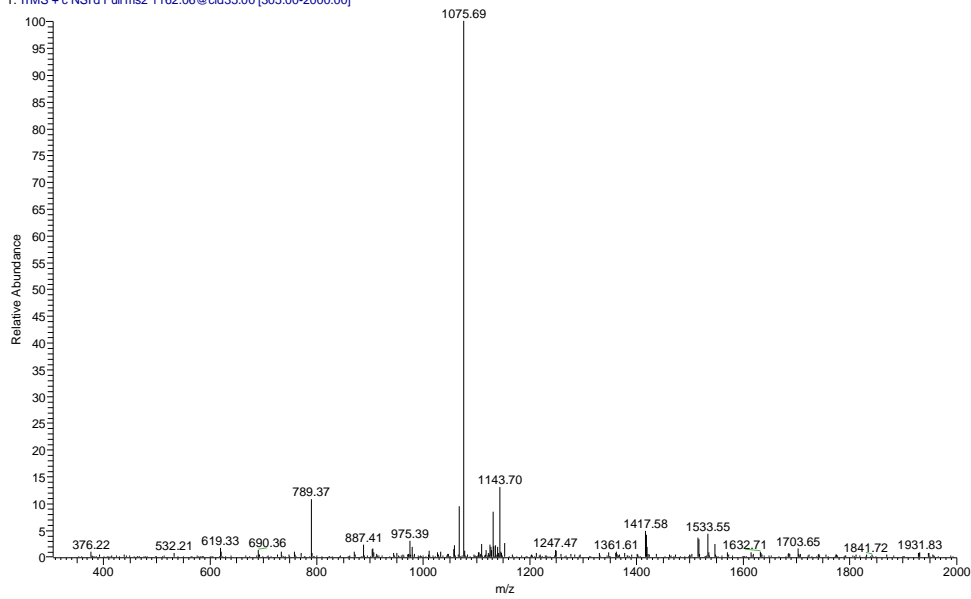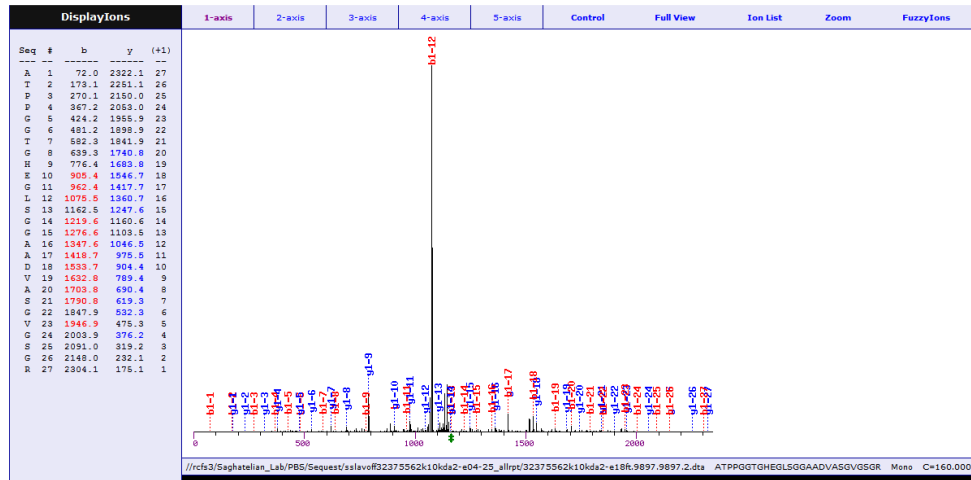

IVVDELSNLK Sf: .9

32375562k10kda2-e18ft.13391 RT: 119.64 AV: 1 NL: 6.52E3  
 T: ITMS + c NSI d Full ms2 565.33@cid35.00 [145.00-1145.00]

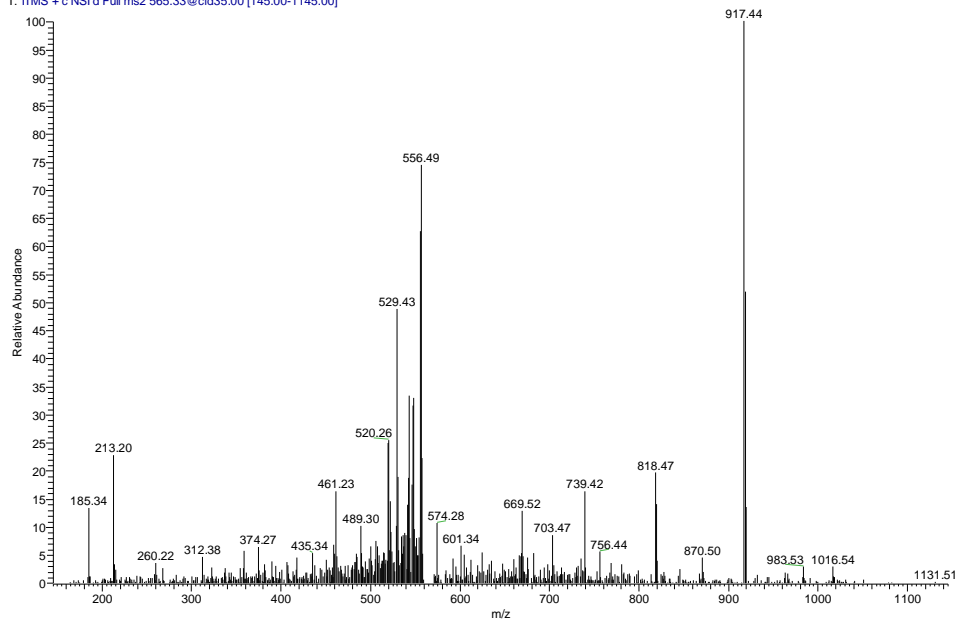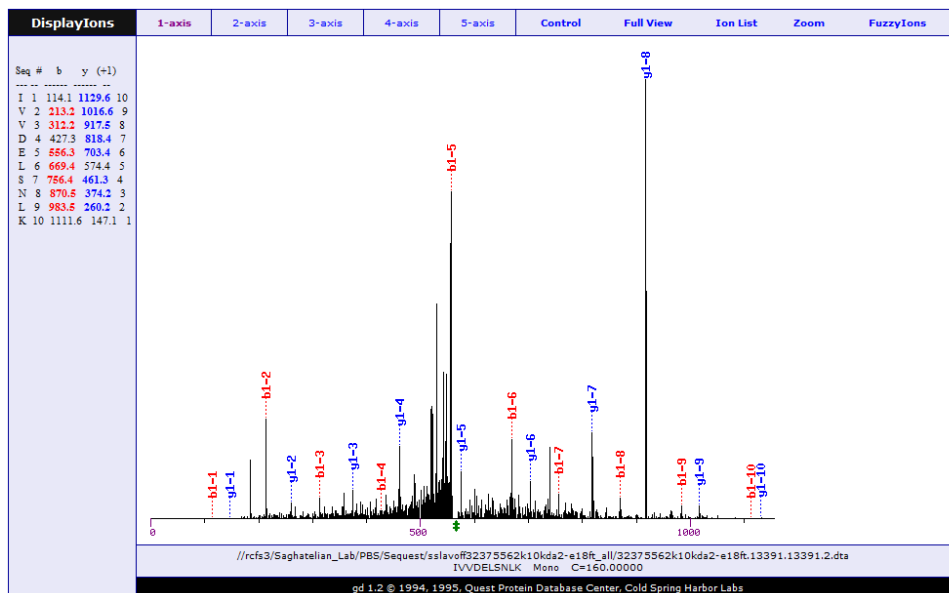

TAPSSTATTASCAATR Sf: .96

32375562k10kda2-e11ft #5818 RT: 64.38 AV: 1 NL: 2.34E4  
T: ITMS + c NSI d Full ms2 856.40@cid35.00 [225.00-2000.00]

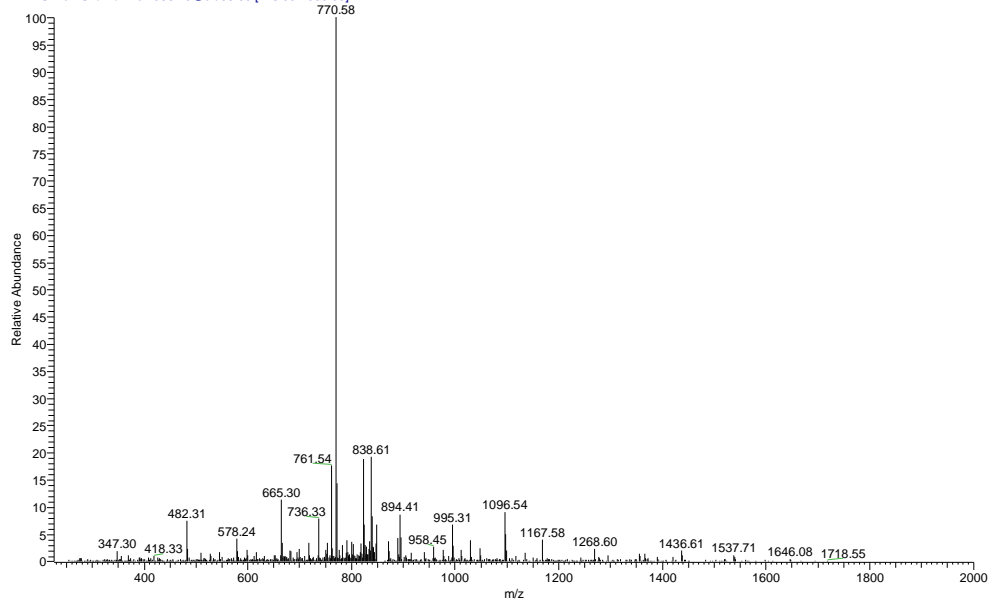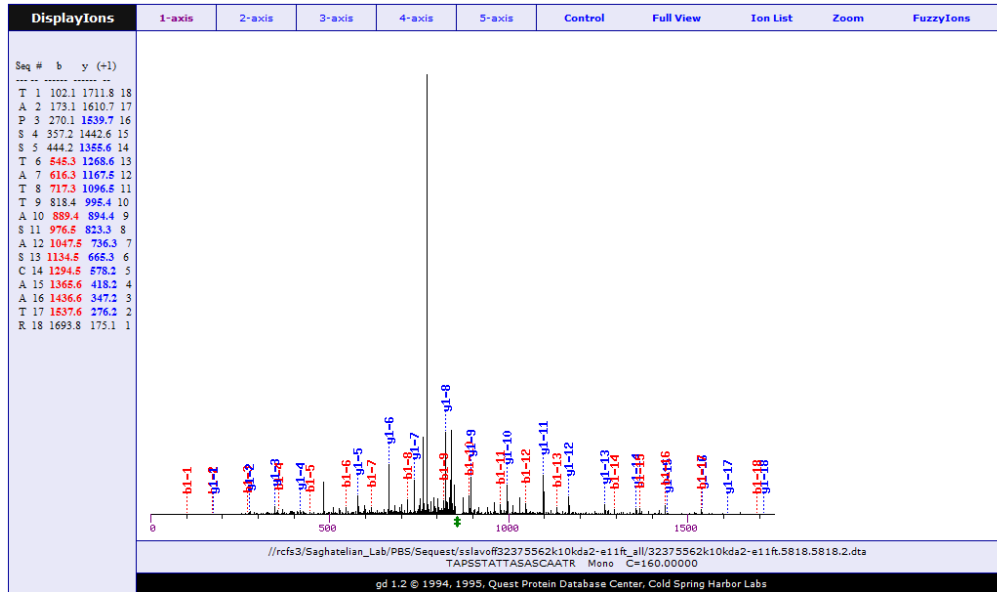

LQVGPADTQPR Sf: .96



32375562k10kda2-e10f #5463 RT: 62.23 AV: 1 NL: 1.74E4  
 T: ITMS + c NSId Full ms2 677.82@cid35.00 [175.00-1370.00]

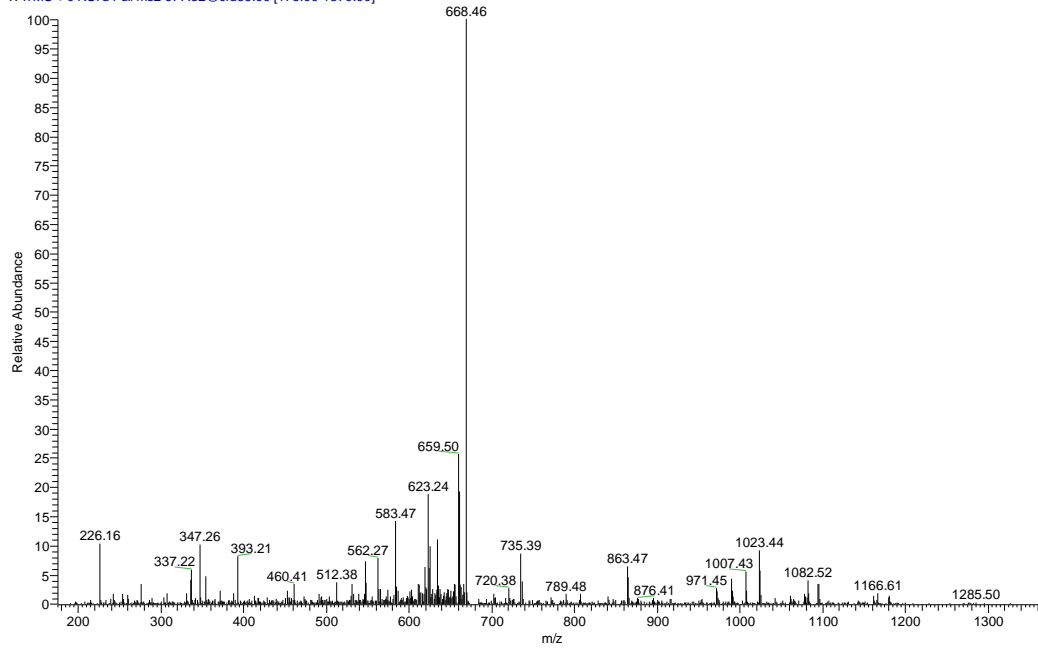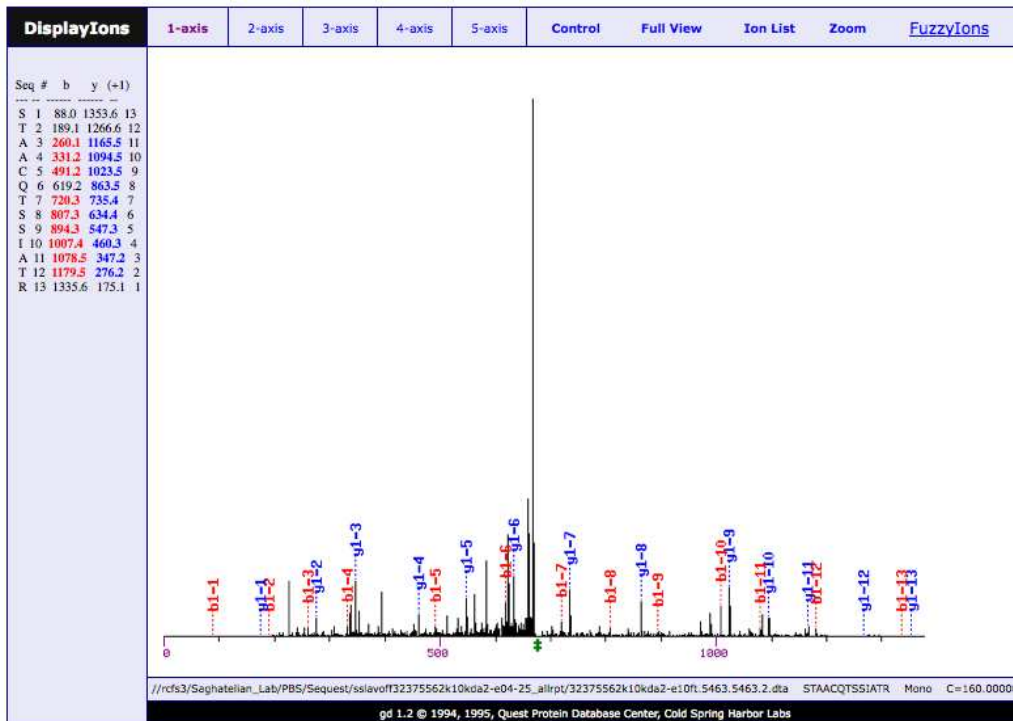

GSSAAVGPR Sf: .84



32238am562kerlic-te10n1 #3669 RT: 52.52 AV: 1 NL: 7.11E3  
 T: ITMS + c NSI d Full ms2 401.21 @cid35.00 [100.00-815.00]

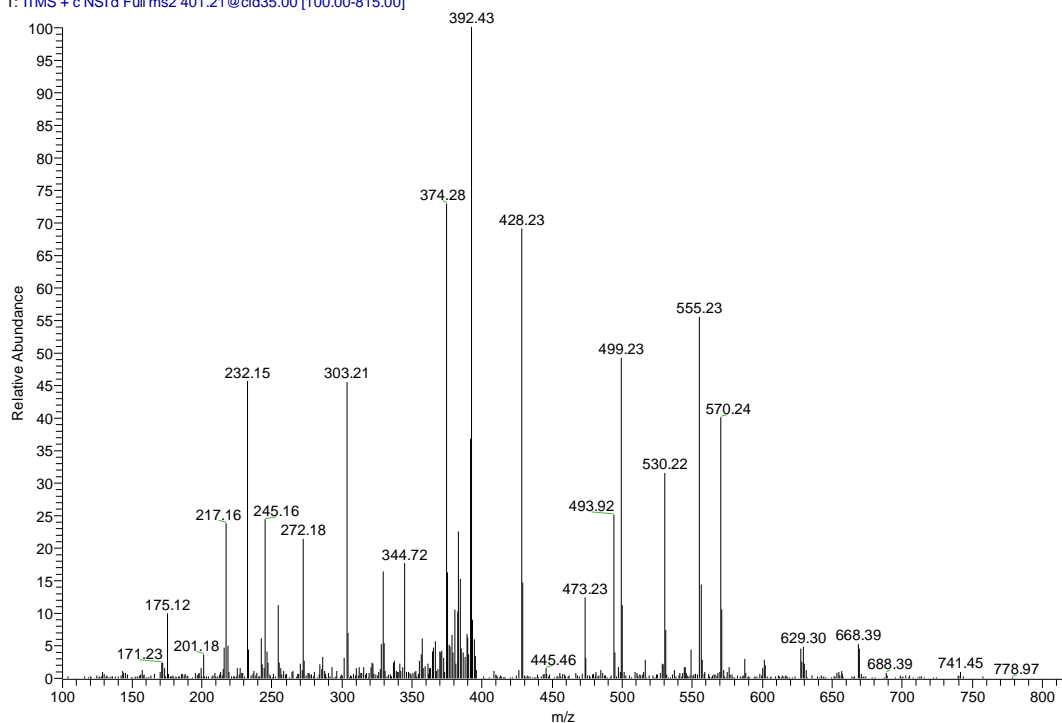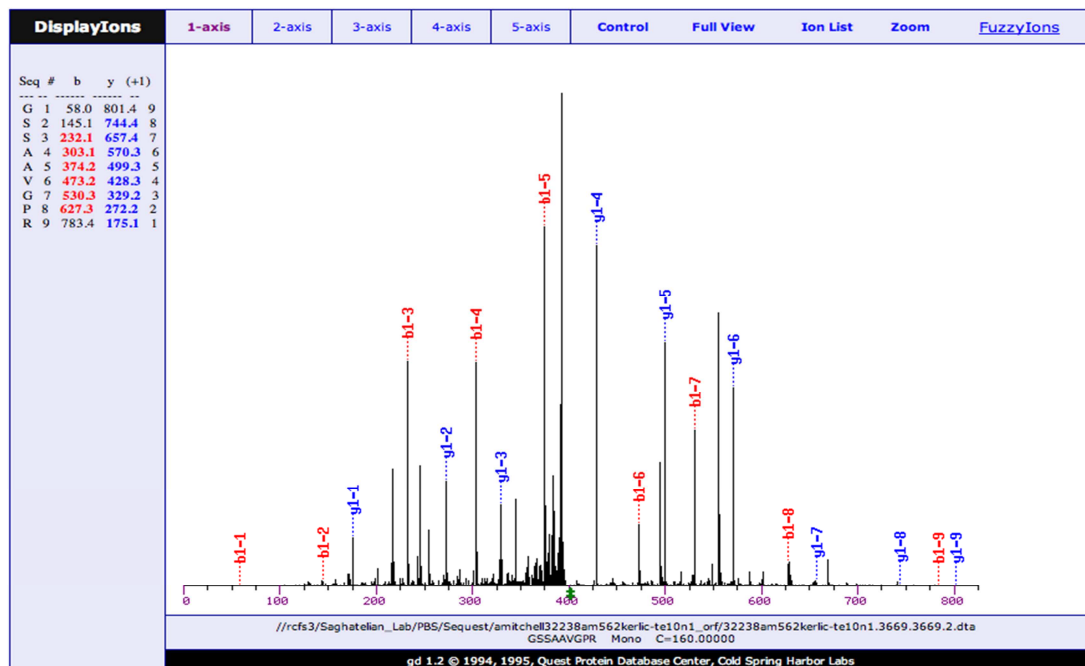

TAAAAAAGTITRPR Sf: .78

32375562k10kda2-e09ft #6466 RT: 71.38 AV: 1 NL: 5.29E3  
T: ITMS + c NSI d Full ms2 664.37@cid35.00 [170.00-2000.00]

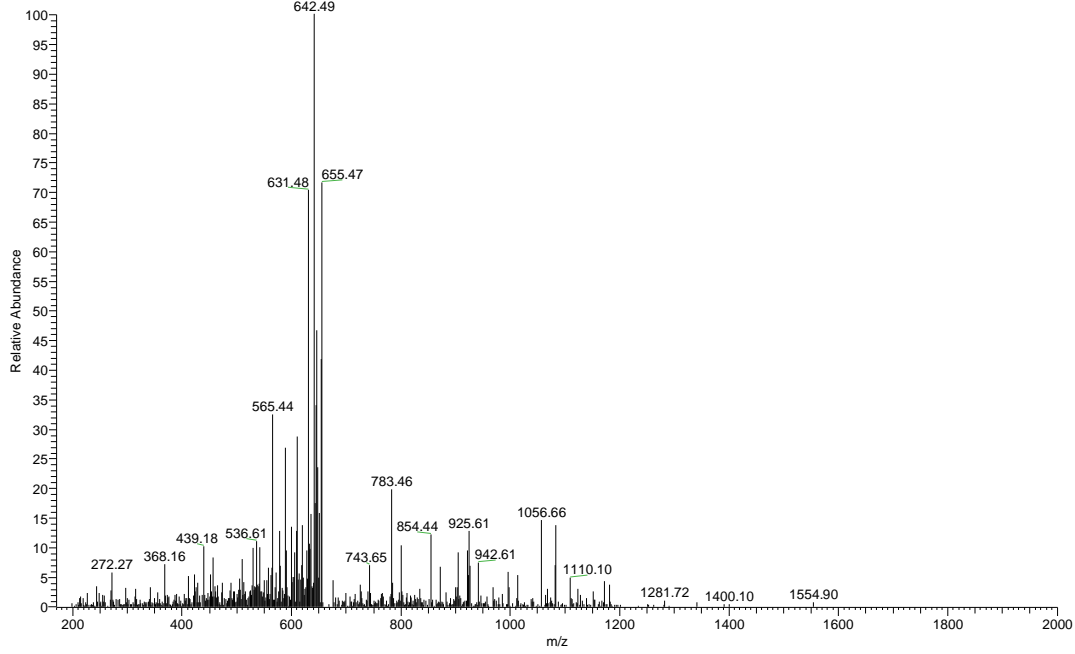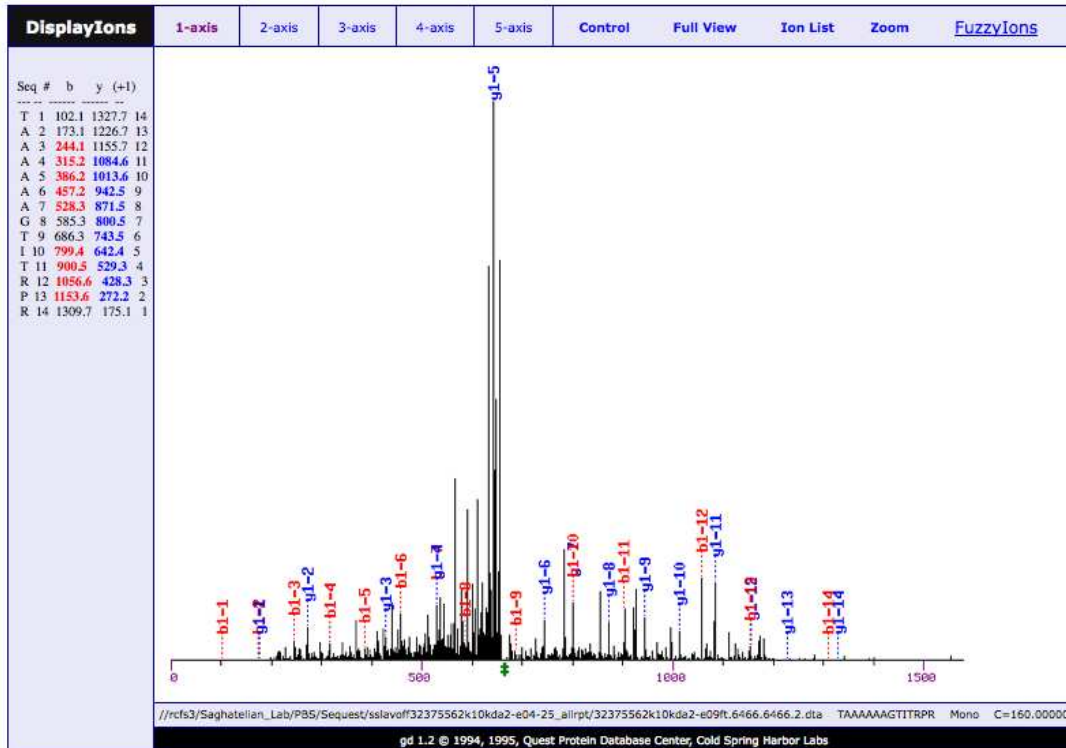

GVGGQAALFAAGR Sf: .96

32375562k10kda2-e05ft #11110 RT: 106.66 AV: 1 NL: 1.73E4  
 T: ITMS + c NSI d Full ms2 588.83@cid35.00 [150.00-1190.00]

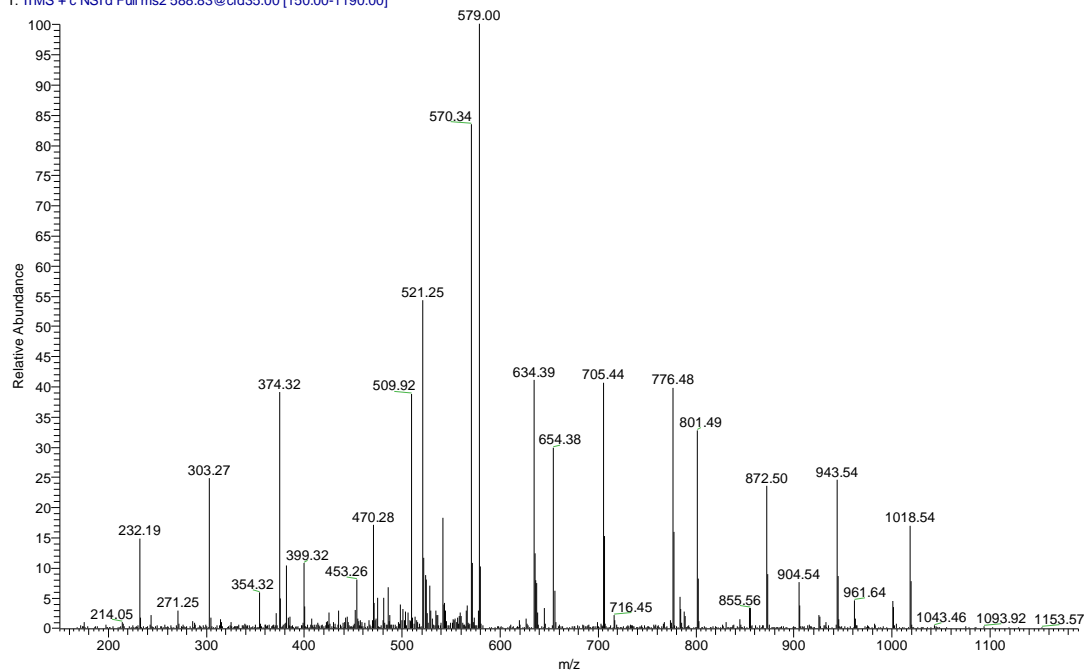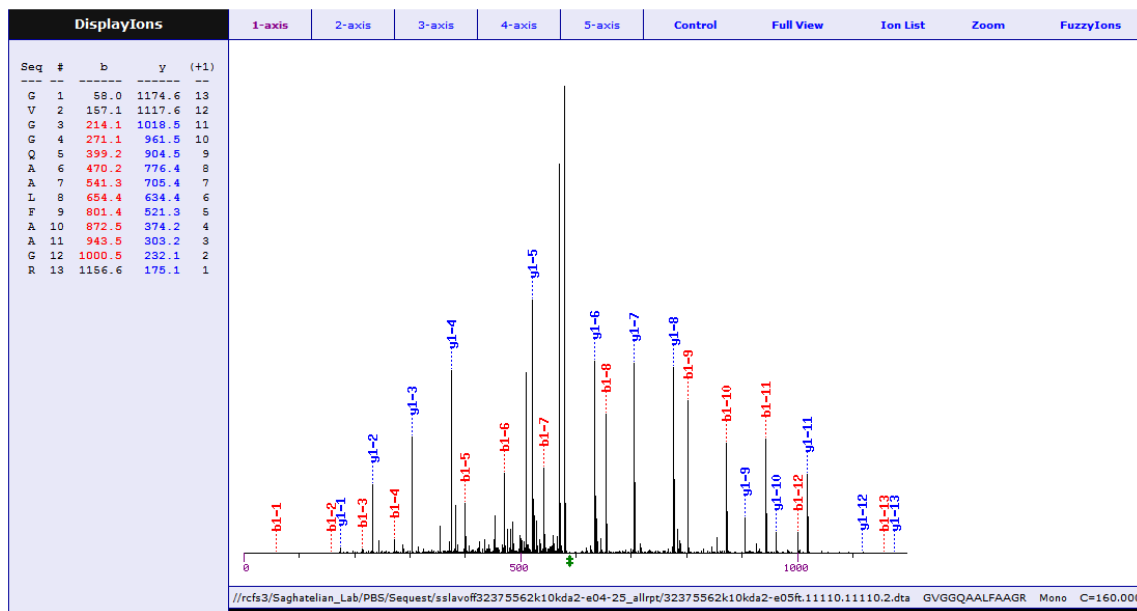

AVAAAAAAPDPGGR Sf: .81

32238am562kerlic-te16n1 #3988 RT: 53.38 AV: 1 NL: 1.49E3  
 T: ITMS + c NSI d Full ms2 633.33@cid35.00 [160.00-1280.00]

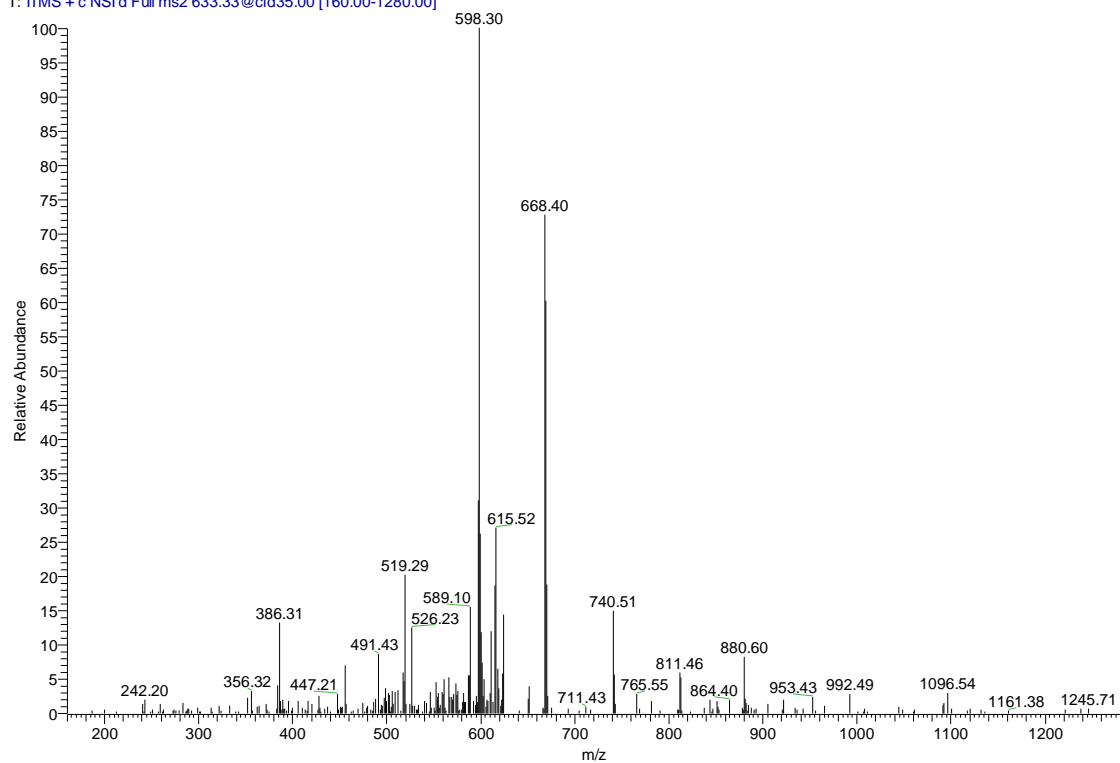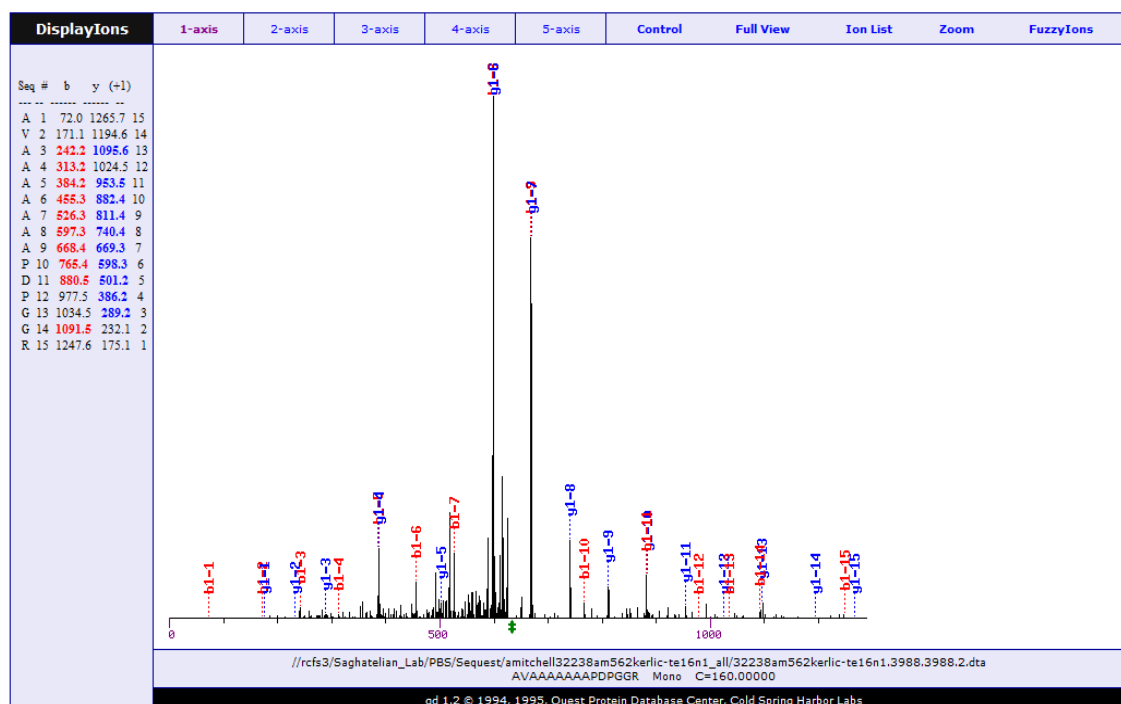

GGLGAASIAADGAPR Sf: .86

32375562k10kda2-e13ft#10845 RT: 93.29 AV: 1 NL: 3.94E4  
 T: ITMS + c NSI d Full ms2 644.38@cid35.00 [165.00-1300.00]

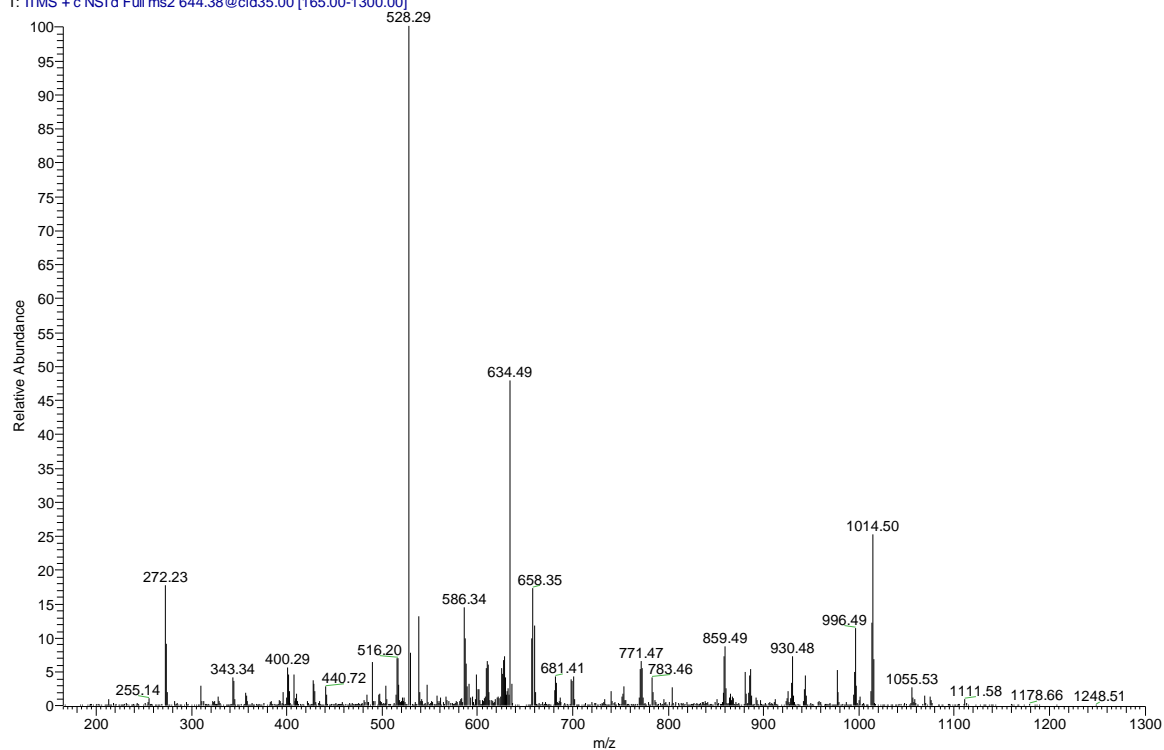

| DisplayIons         | 1-axis | 2-axis | 3-axis | 4-axis | 5-axis | Control | Full View | Ion List | Zoom | FuzzyIons |
|---------------------|--------|--------|--------|--------|--------|---------|-----------|----------|------|-----------|
| Seq # b y (+1)      |        |        |        |        |        |         |           |          |      |           |
| G 1 58.0 1283.7 15  |        |        |        |        |        |         |           |          |      |           |
| G 2 115.1 1226.6 14 |        |        |        |        |        |         |           |          |      |           |
| L 3 228.1 1169.6 13 |        |        |        |        |        |         |           |          |      |           |
| G 4 285.2 1056.5 12 |        |        |        |        |        |         |           |          |      |           |
| A 5 356.2 999.5 11  |        |        |        |        |        |         |           |          |      |           |
| A 6 427.2 928.5 10  |        |        |        |        |        |         |           |          |      |           |
| S 7 514.3 857.4 9   |        |        |        |        |        |         |           |          |      |           |
| I 8 627.3 770.4 8   |        |        |        |        |        |         |           |          |      |           |
| A 9 698.4 657.3 7   |        |        |        |        |        |         |           |          |      |           |
| A 10 769.4 586.3 6  |        |        |        |        |        |         |           |          |      |           |
| D 11 884.4 515.3 5  |        |        |        |        |        |         |           |          |      |           |
| G 12 941.5 400.2 4  |        |        |        |        |        |         |           |          |      |           |
| A 13 1012.5 343.2 3 |        |        |        |        |        |         |           |          |      |           |
| P 14 1109.6 272.2 2 |        |        |        |        |        |         |           |          |      |           |
| R 15 1265.7 175.1 1 |        |        |        |        |        |         |           |          |      |           |

  

//rcfs3/Saghatelian\_Lab/PBS/Sequest/sslavoff32375562k10kda2-e13ft\_all/32375562k10kda2-e13ft.10845.10845.2.dta  
 GGLGAASIAADGAPR Mono C=160.00000

gd 1.2 © 1994, 1995, Quest Protein Database Center, Cold Spring Harbor Labs

SSTPAPPQGQLPSSI Sf: .78

32238am562kerlic-te14n2 #8920 RT: 96.77 AV: 1 NL: 2.50E3  
 T: ITMS + c NSI d Full ms2 812.42@cid35.00 [210.00-1635.00]

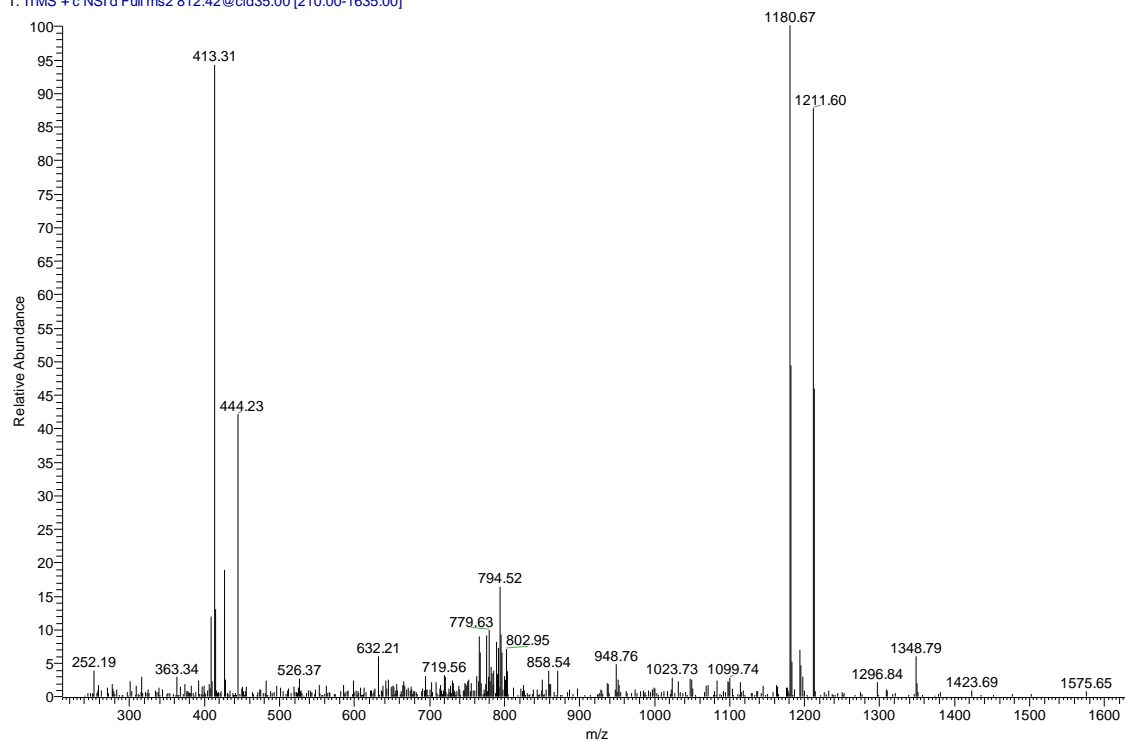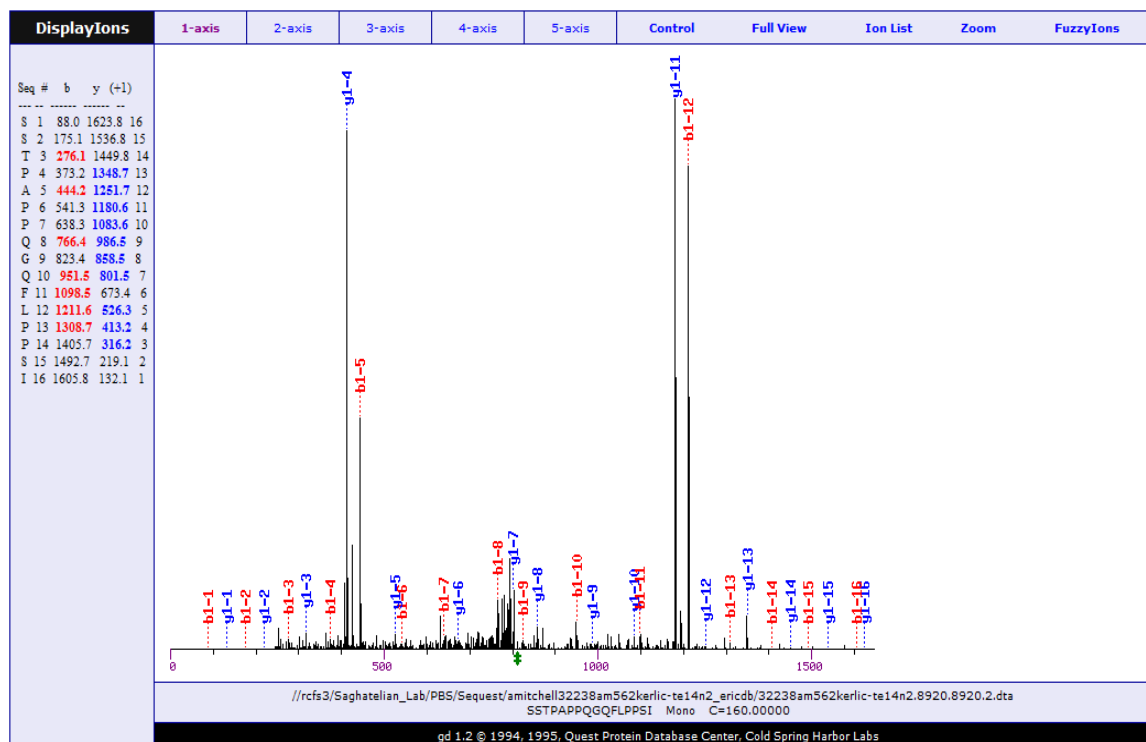

VAVEEGLPGDPVAER Sf: .94

32238am562kerlic-te35n1 #4775 RT: 66.43 AV: 1 NL: 4.85E3  
 T: ITMS + c NSI d Full ms2 769.40@cid35.00 [200.00-1550.00]

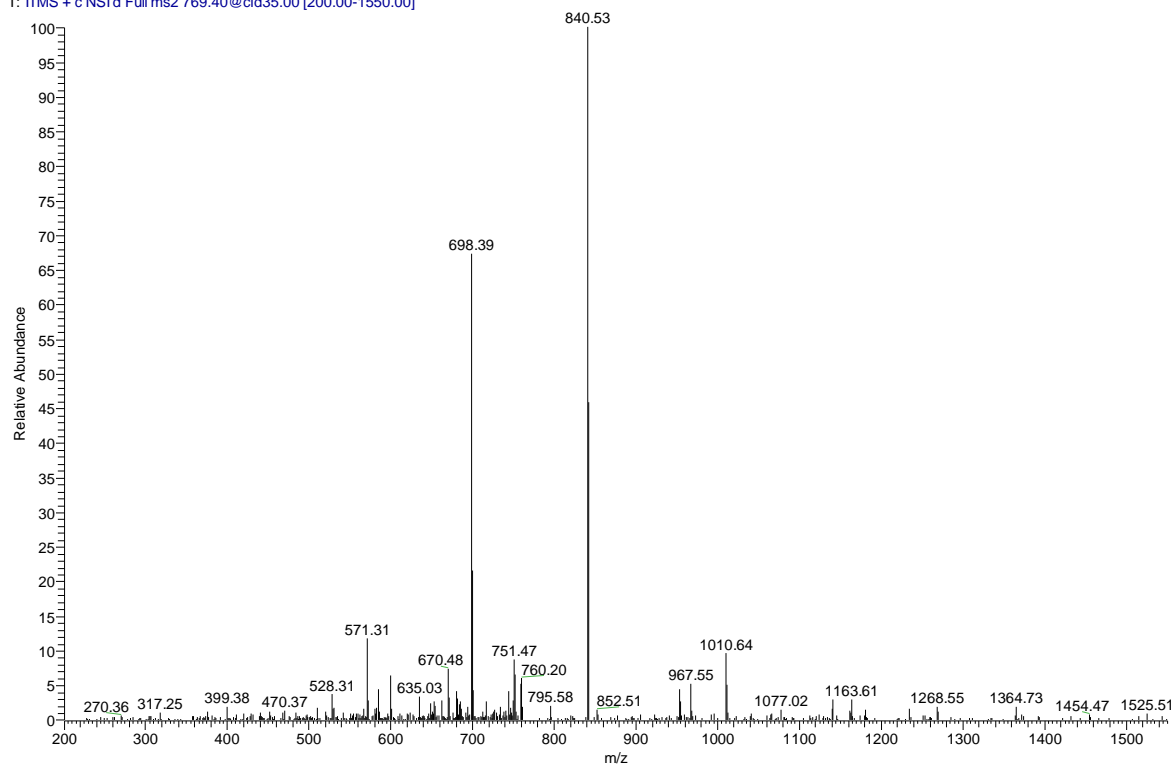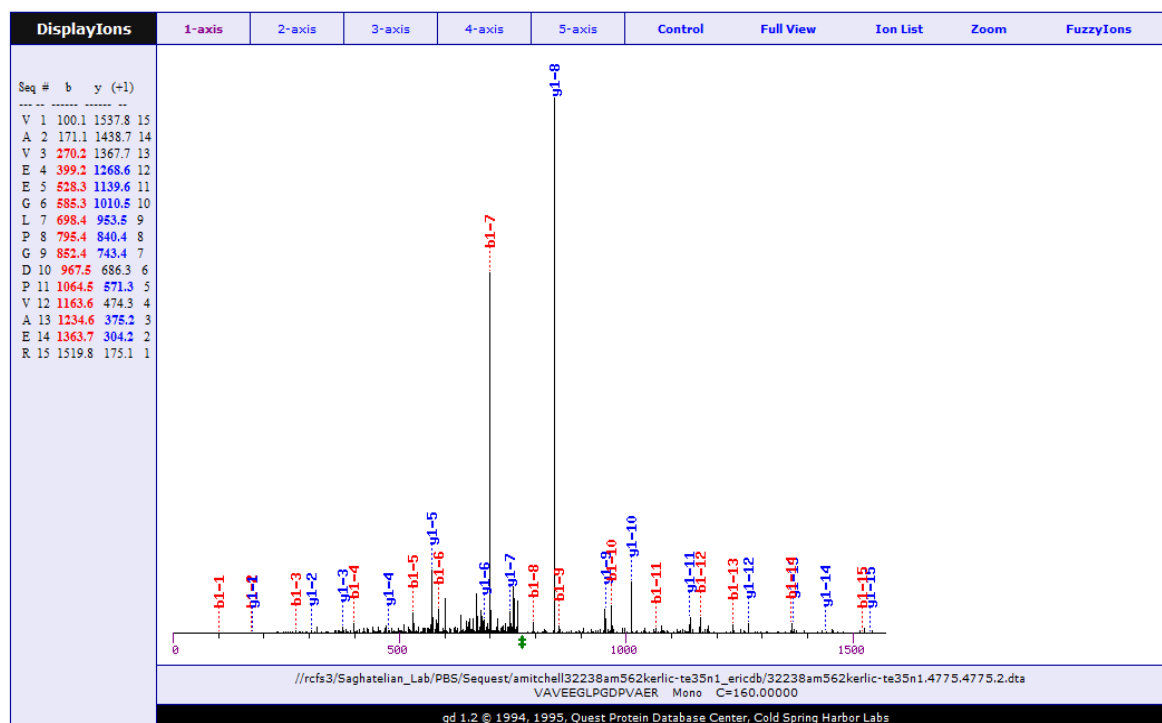

EGSVHPQVE Sf: .76

32238am562kerlic-te15n1 #3867 RT: 51.99 AV: 1 NL: 4.74E3  
T: ITMS + c NSI d Full ms2 491.24@cid35.00 [125.00-995.00]

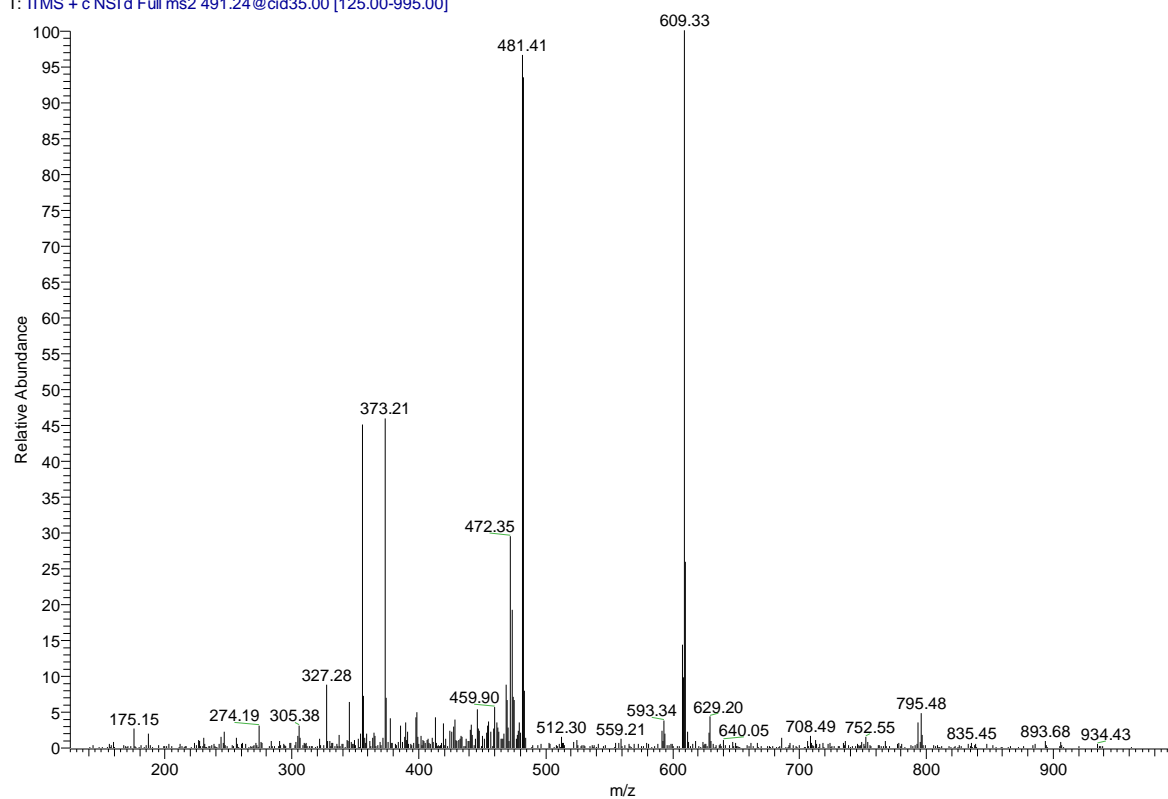



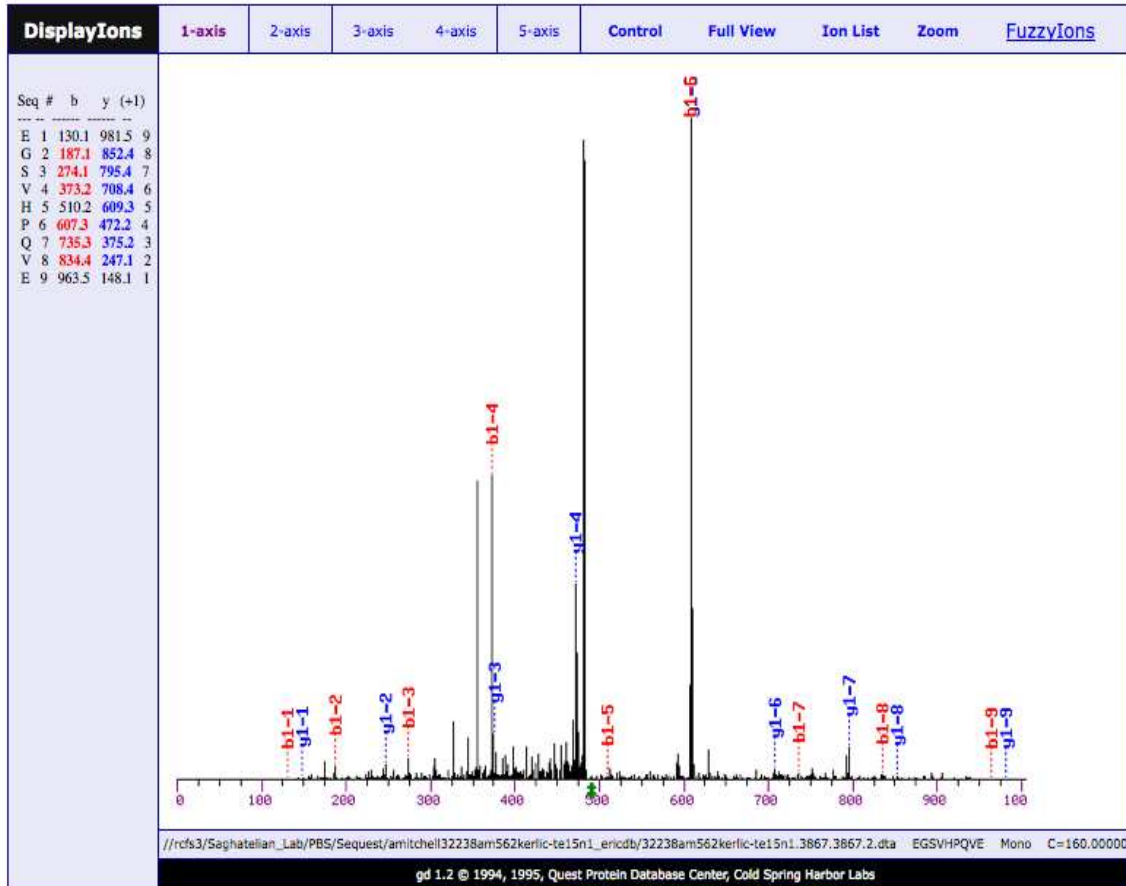

GAIGGGGAGVQQQTAGAR Sf: .91

32375562k10kda2-e10ft #6127 RT: 66.72 AV: 1 NL: 3.99E3  
 T: ITMS + c NSI d Full ms2 742.88@cid35.00 [190.00-2000.00]

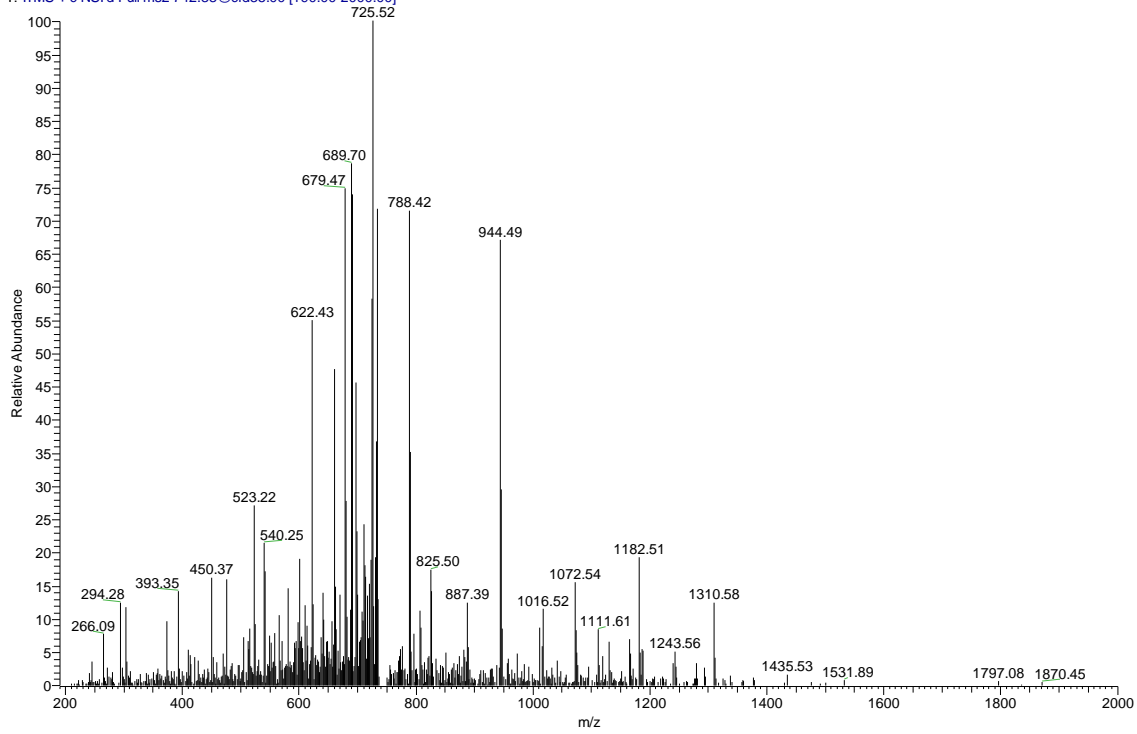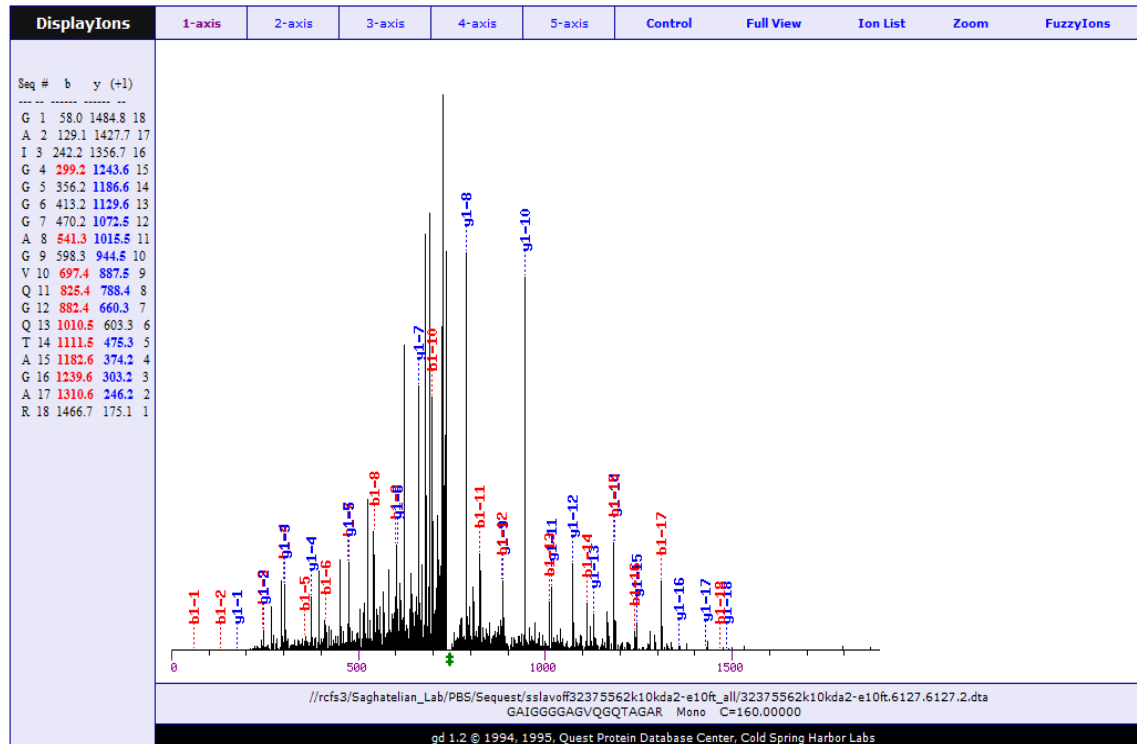

VAAVAVGSQAVLQILSR Sf: .9

32375562k10kda2-e04ft #20423 RT: 165.77 AV: 1 NL: 1.33E3  
 T: ITMS + c NSI d Full ms2 841.50@cid35.00 [220.00-1695.00]

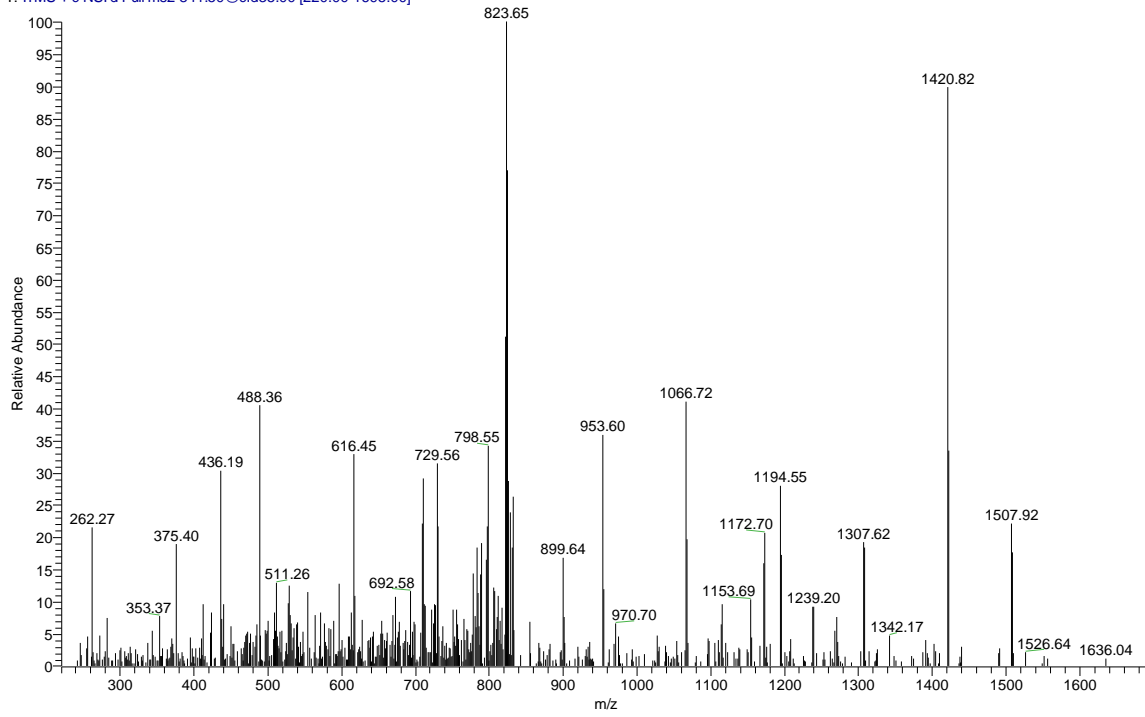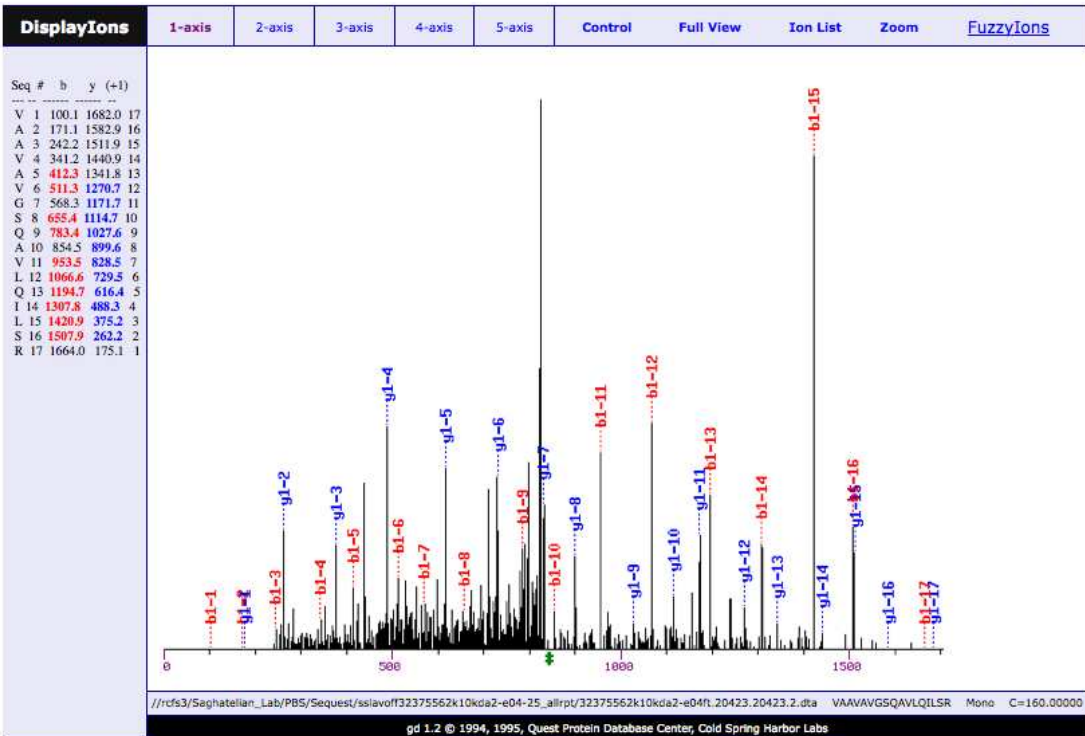

WTSSSTSSPNTSGAPR Sf: .94

32375562k10kda2-e11ft#6635 RT: 69.70 AV: 1 NL: 1.07E4  
 T: ITMS + c NSI d Full ms2 768.86@cid35.00 [200.00-1550.00]

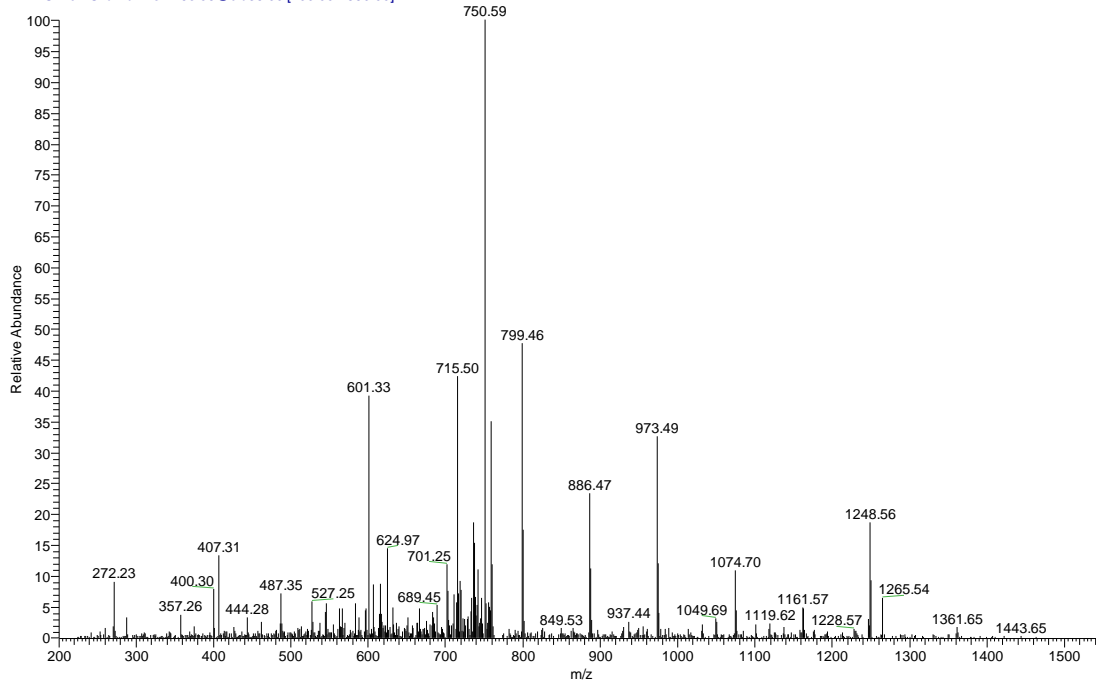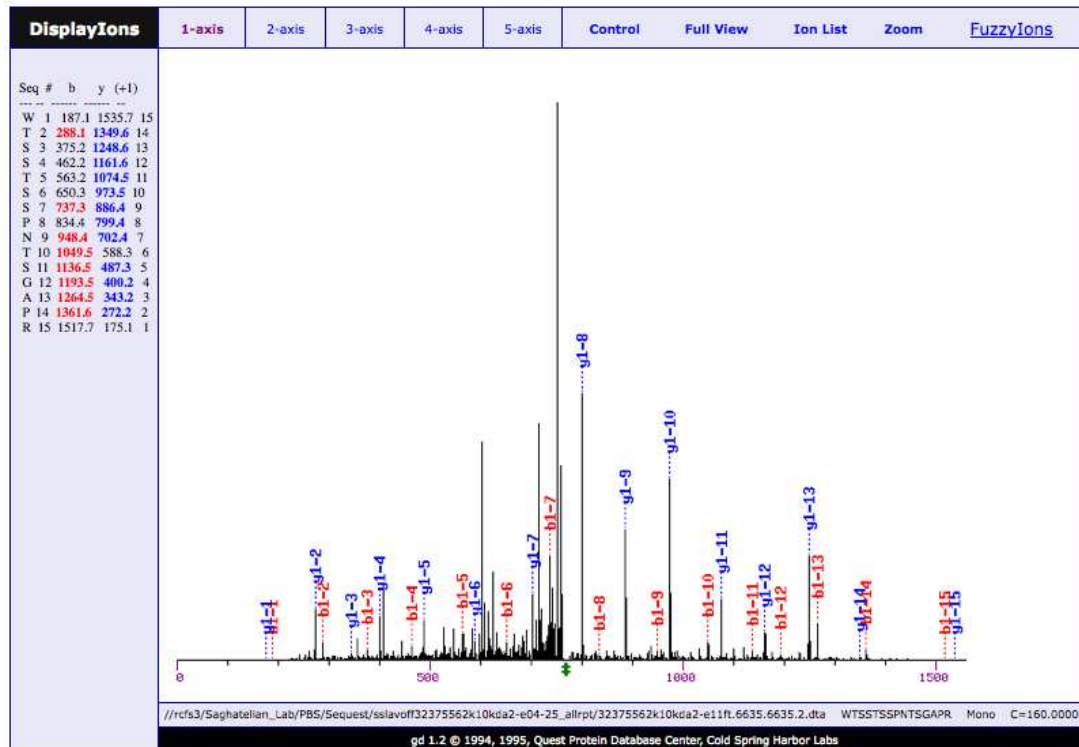

NPPLVQDTVSGK Sf: .9

32375562k10kda2-e15ft#9509 RT: 85.14 AV: 1 NL: 2.55E3  
 T: ITMS + c NSI d Full ms2 627.84@cid35.00 [160.00-1895.00]

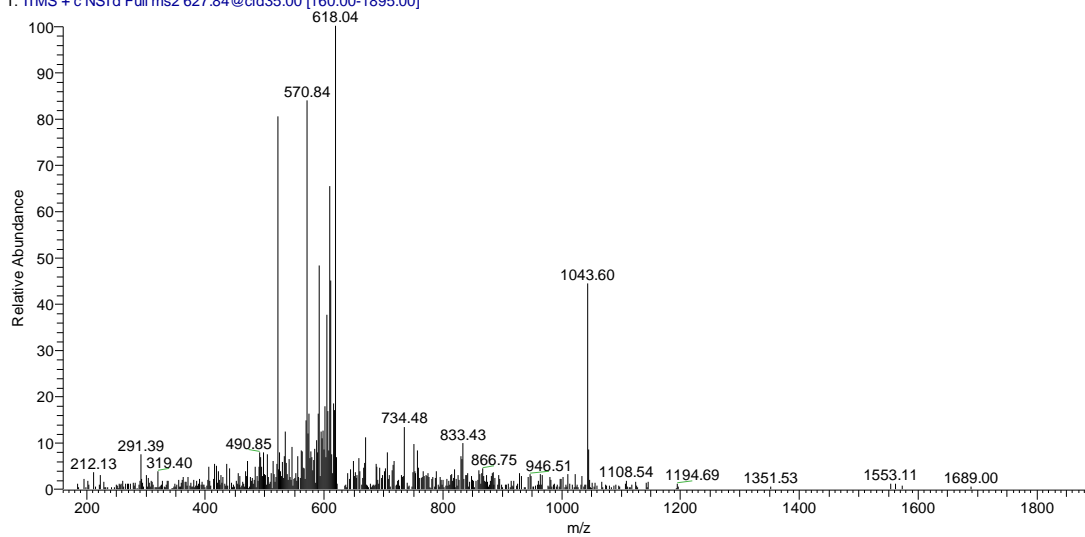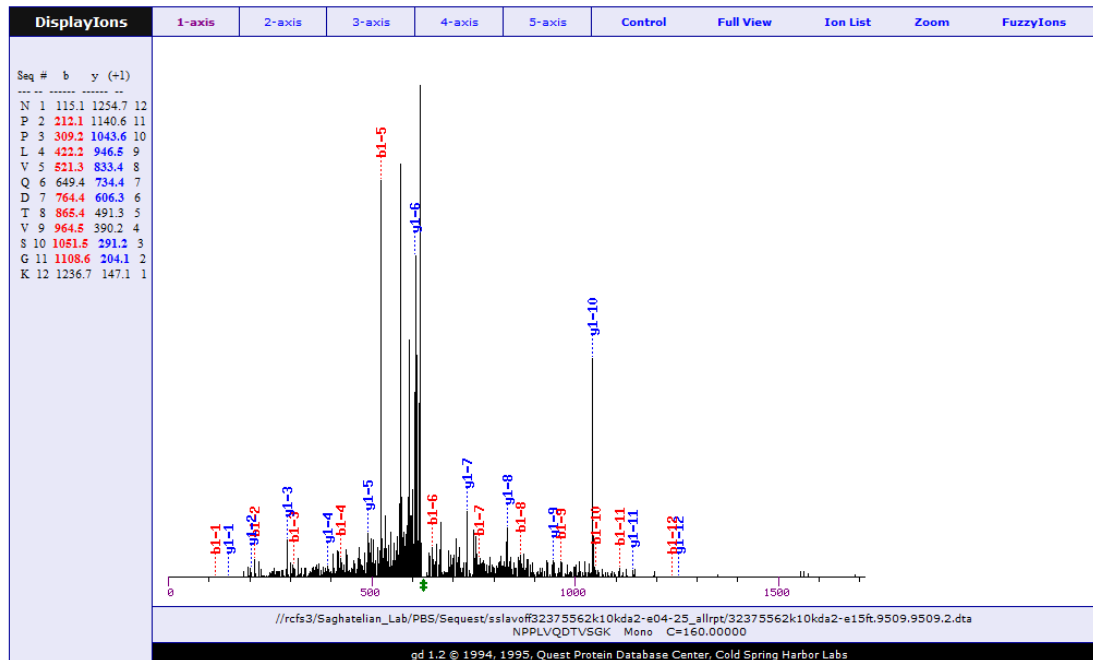

QTAFGKWYESLLNNR Sf: .78

32238am562keric-te29n2#10257 RT: 144.60 AV: 1 NL: 1.70E3  
 T: ITMS + c NSI d Full ms2 914.46@cid35.00 [240.00-1840.00]

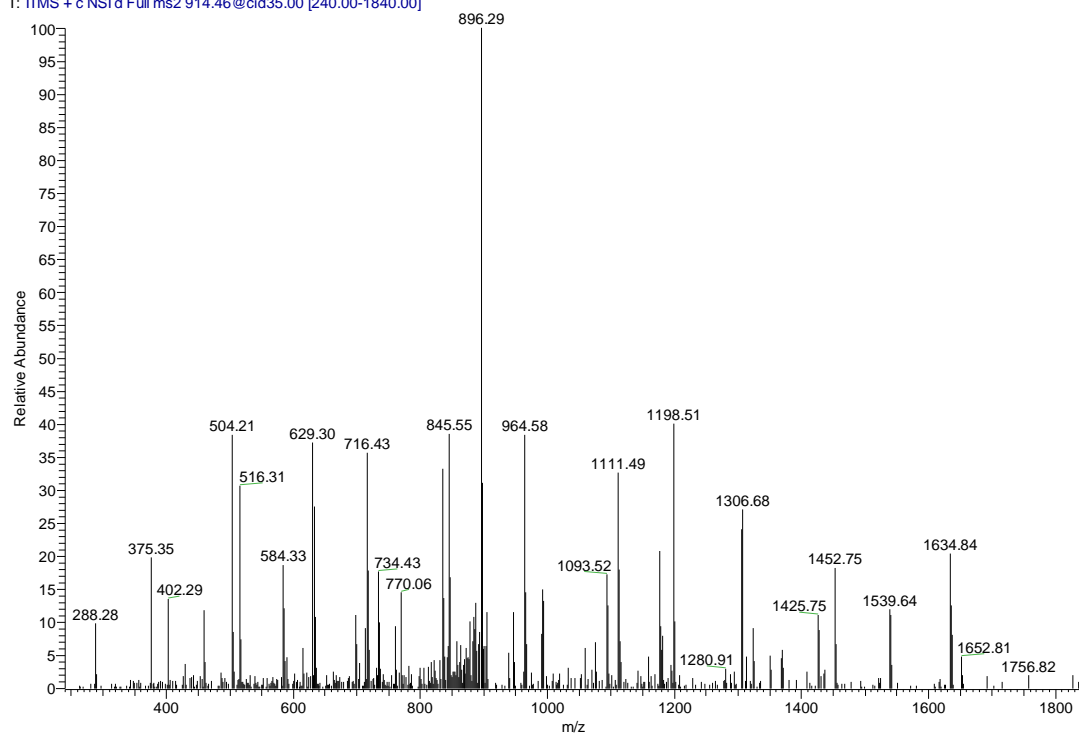

| DisplayIons                                                                                                                                                                                                                                                                                                                                                            | 1-axis | 2-axis | 3-axis | 4-axis | 5-axis | Control | Full View | Ion List | Zoom | FuzzyIons |
|------------------------------------------------------------------------------------------------------------------------------------------------------------------------------------------------------------------------------------------------------------------------------------------------------------------------------------------------------------------------|--------|--------|--------|--------|--------|---------|-----------|----------|------|-----------|
| <pre> Seq #  b  y (+1) --- Q  1 129.1 1826.9 15 T  2 230.1 1698.9 14 A  3 301.2 1597.8 13 F  4 448.2 1526.8 12 G  5 505.2 1379.7 11 K  6 633.3 1322.7 10 W  7 819.4 1194.6  9 Y  8 982.5 1008.5  8 E  9 1111.5 845.4  7 S 10 1198.6 716.4  6 L 11 1311.6 629.4  5 L 12 1424.7 516.3  4 N 13 1538.8 403.2  3 N 14 1652.8 289.2  2 R 15 1808.9 175.1  1           </pre> |        |        |        |        |        |         |           |          |      |           |
| <p>//rcfs3/Saghatellan_Lab/PBS/Sequest/amitchell32238am562keric-te29n2_orf/32238am562keric-te29n2.10257.10257.2.dta<br/>           QTAFGKWYESSLLNRR Mono C=160.00000</p> <p>gd 1.2 © 1994, 1995, Quest Protein Database Center, Cold Spring Harbor Labs</p>                                                                                                            |        |        |        |        |        |         |           |          |      |           |

AVAGAAAGAGGR Sf: .79

32375562k10kda2-e10ft#7200 RT: 73.61 AV: 1 NL: 3.90E3  
 T: ITMS + c NSI d Full ms2 972.52@cid35.00 [255.00-985.00]

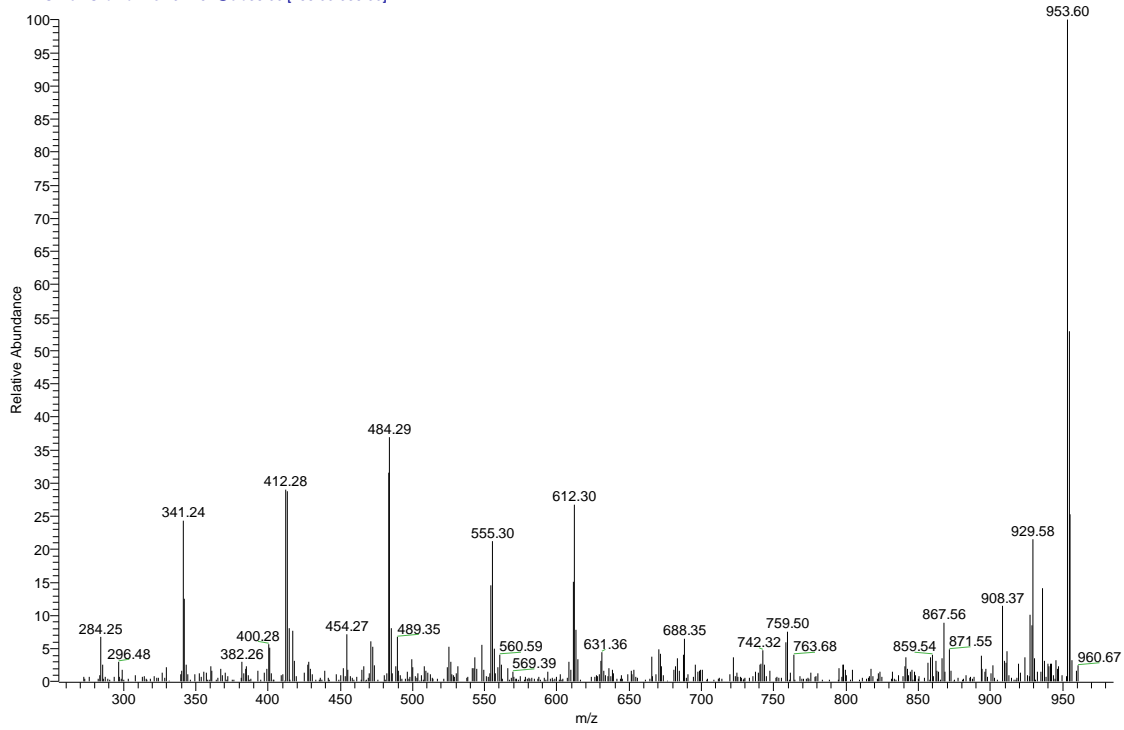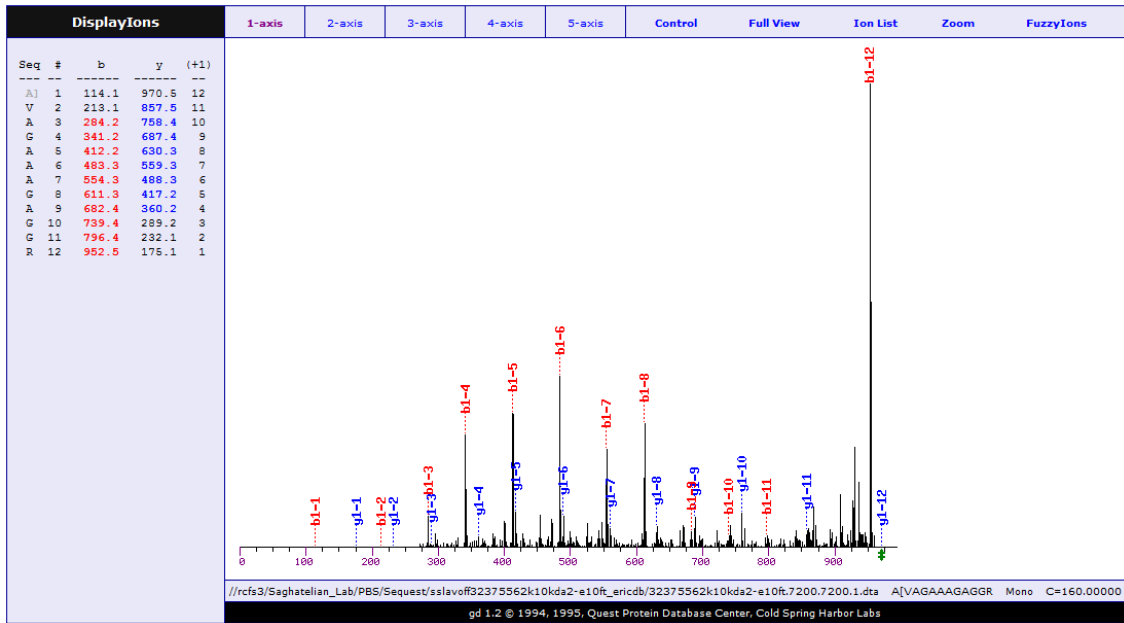

AEEQPLGPGAAGR Sf: .94

32375562k10kda2-e22ft #7918 RT: 75.35 AV: 1 NL: 1.63E4  
 T: ITMS + c NSI d Full ms2 655.33@cid35.00 [170.00-1325.00]

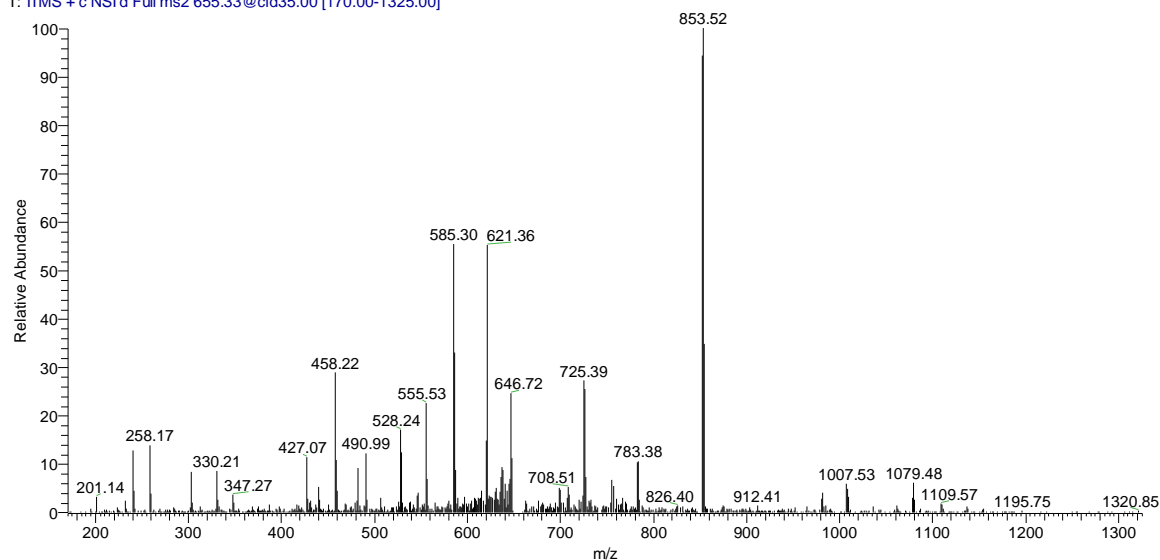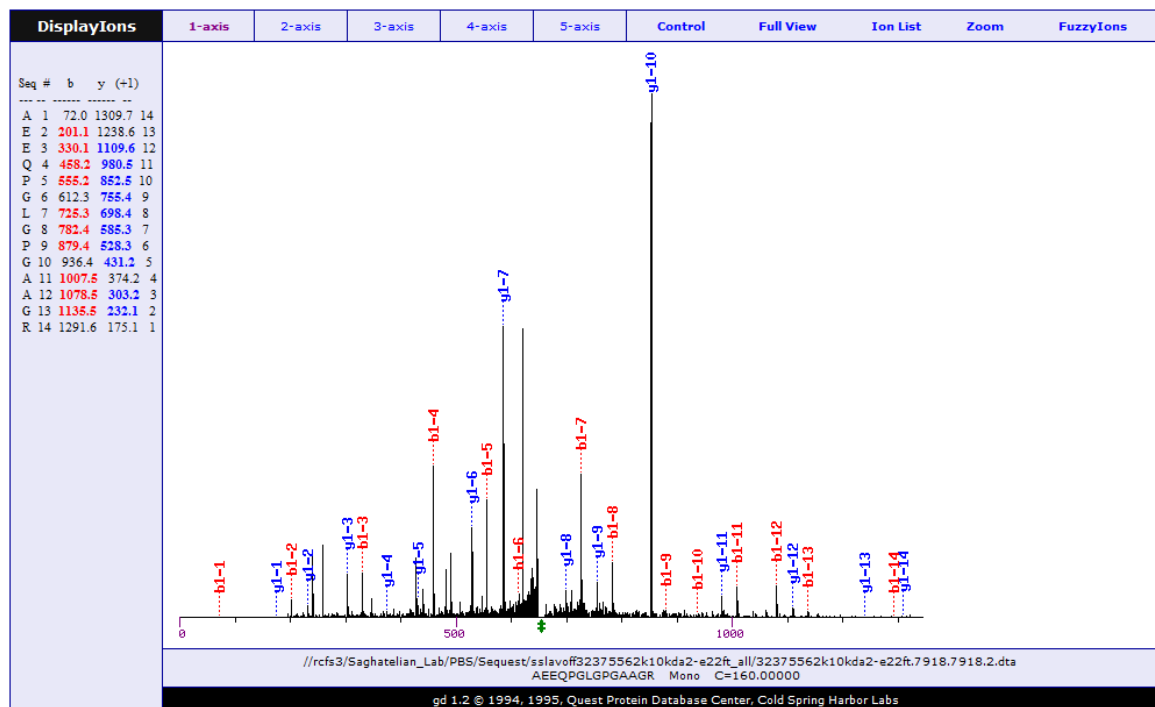

RAVPAQGLLQSTPTCMPWTP Sf: .84



32238am562kerlic-te31n2 #5061 RT: 79.57 AV: 1 NL: 5.63E3  
 T: ITMS + c NSI d Full ms2 739.05@cid35.00 [190.00-2000.00]

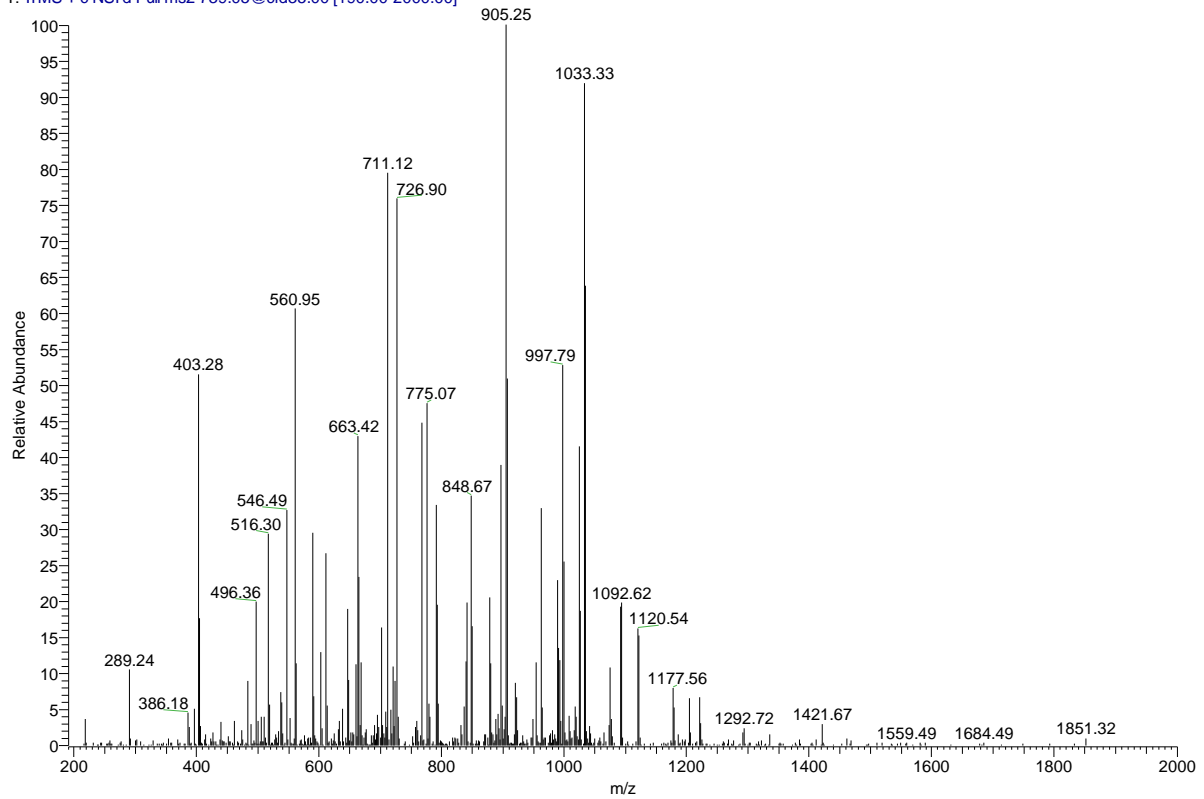

**DisplayIons**    1-axis    2-axis    3-axis    4-axis    5-axis    Control    Full View    Ion List    Zoom    [FuzzyIons](#)

| Seq # | b  | y (+1)        |
|-------|----|---------------|
| R     | 1  | 157.1 2211.1  |
| A     | 2  | 228.1 2055.0  |
| V     | 3  | 327.2 1983.9  |
| P     | 4  | 424.3 1884.9  |
| A     | 5  | 495.3 1787.8  |
| Q     | 6  | 623.4 1716.8  |
| G     | 7  | 680.4 1588.7  |
| L     | 8  | 793.5 1531.7  |
| L     | 9  | 906.6 1418.6  |
| Q     | 10 | 1034.6 1305.5 |
| S     | 11 | 1121.6 1177.5 |
| T     | 12 | 1222.7 1099.4 |
| P     | 13 | 1319.7 989.4  |
| T     | 14 | 1420.8 892.3  |
| C     | 15 | 1580.8 791.3  |
| M     | 16 | 1711.8 631.3  |
| P     | 17 | 1808.9 500.3  |
| W     | 18 | 1995.0 403.2  |
| T     | 19 | 2096.0 217.1  |
| P     | 20 | 2193.1 116.1  |

  

| Seq # | b  | y (+2)       |
|-------|----|--------------|
| R     | 1  | 79.1 1106.0  |
| A     | 2  | 114.6 1028.0 |
| V     | 3  | 164.1 992.5  |
| P     | 4  | 212.6 942.9  |
| A     | 5  | 248.2 894.4  |
| Q     | 6  | 312.2 858.9  |
| G     | 7  | 340.7 794.9  |
| L     | 8  | 397.2 766.4  |
| L     | 9  | 453.8 709.8  |
| Q     | 10 | 517.8 653.3  |
| S     | 11 | 561.3 589.2  |
| T     | 12 | 611.8 545.7  |
| P     | 13 | 660.4 495.2  |
| T     | 14 | 710.9 446.7  |
| C     | 15 | 790.9 396.1  |
| M     | 16 | 856.4 316.1  |
| P     | 17 | 904.9 250.6  |

//rcfs3/Saghetelien\_Lab/PBS/Sequest/amitchell32238am562kerlic-te31n2\_ericdb/32238am562kerlic-te31n2.5061.5061.3.dat    RAVPAQGLLQSTPTCMPWTP    Mono    C=160.00000

gd 1.2 © 1994, 1995, Quest Protein Database Center, Cold Spring Harbor Labs

# NTTQESLEKGP Sf: .78

32238am562kerlic-te24n2 #5218 RT: 72.83 AV: 1 NL: 1.70E3  
T: ITMS + c NSI d Full ms2 602.30@cid35.00 [155.00-1215.00]

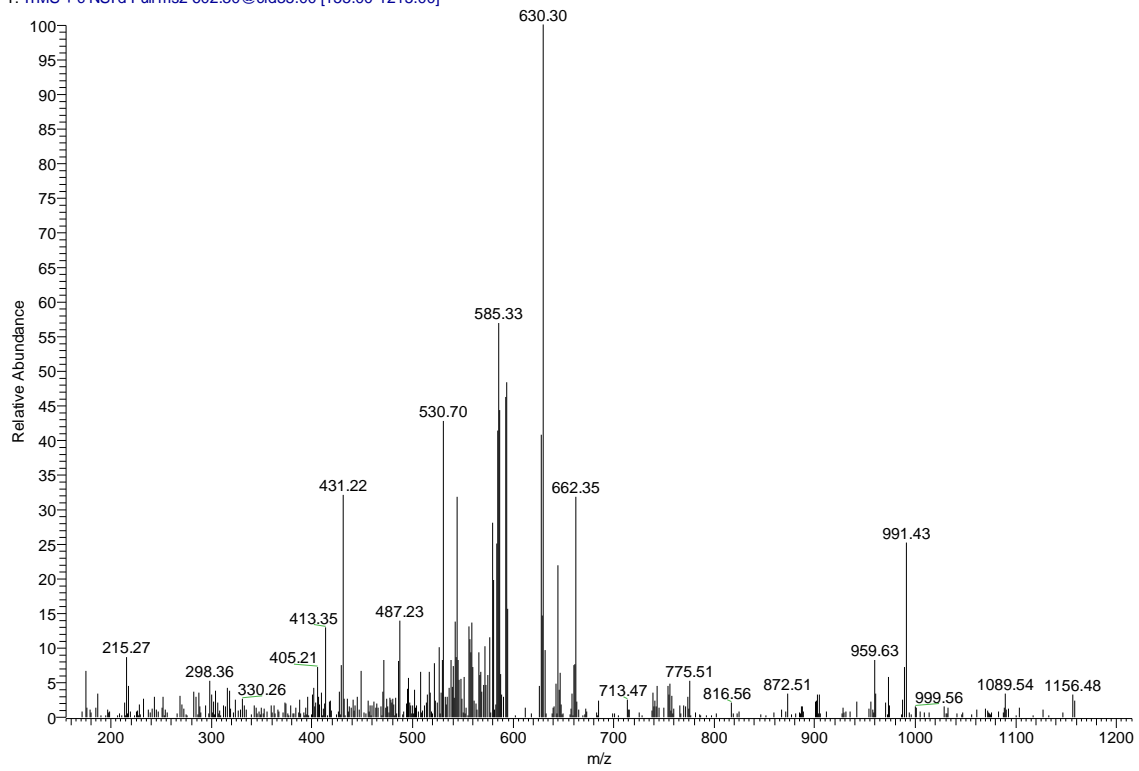

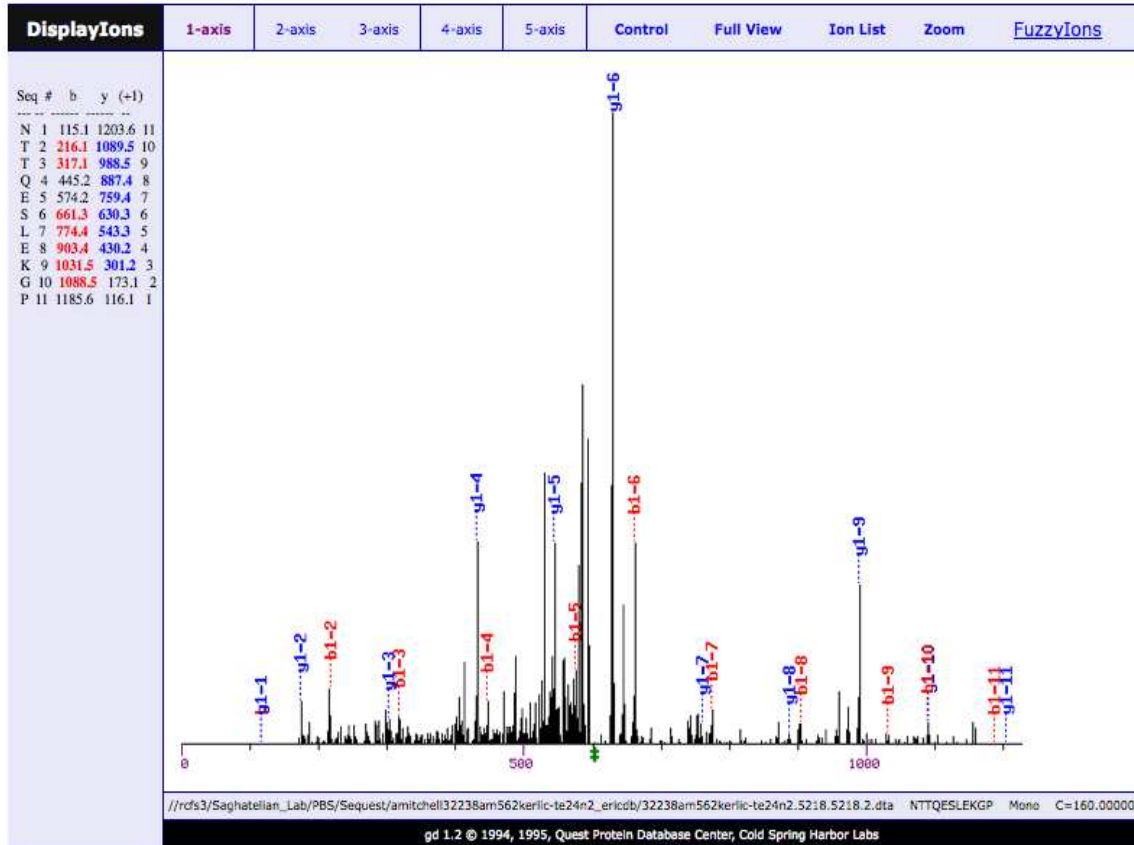

EALNEFLTR Sf: .87

32238am562kerlic-te19n3 #7567 RT: 103.76 AV: 1 NL: 7.71E2  
 T: ITMS + c NSI d Full ms2 546.79@cid35.00 [140.00-1105.00]

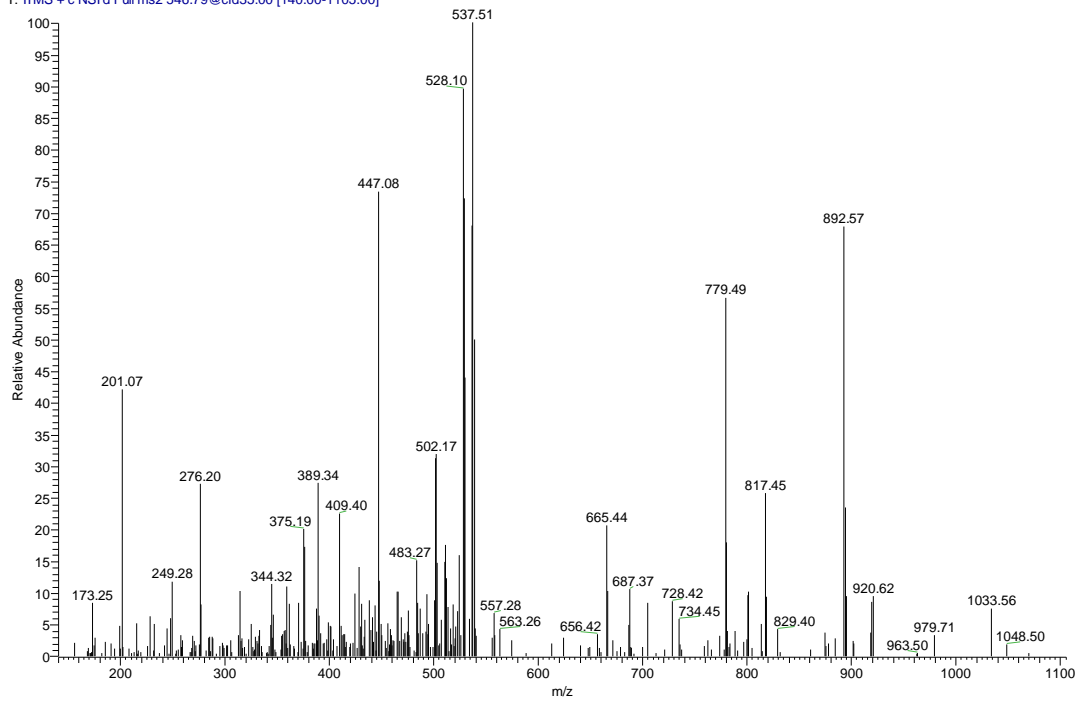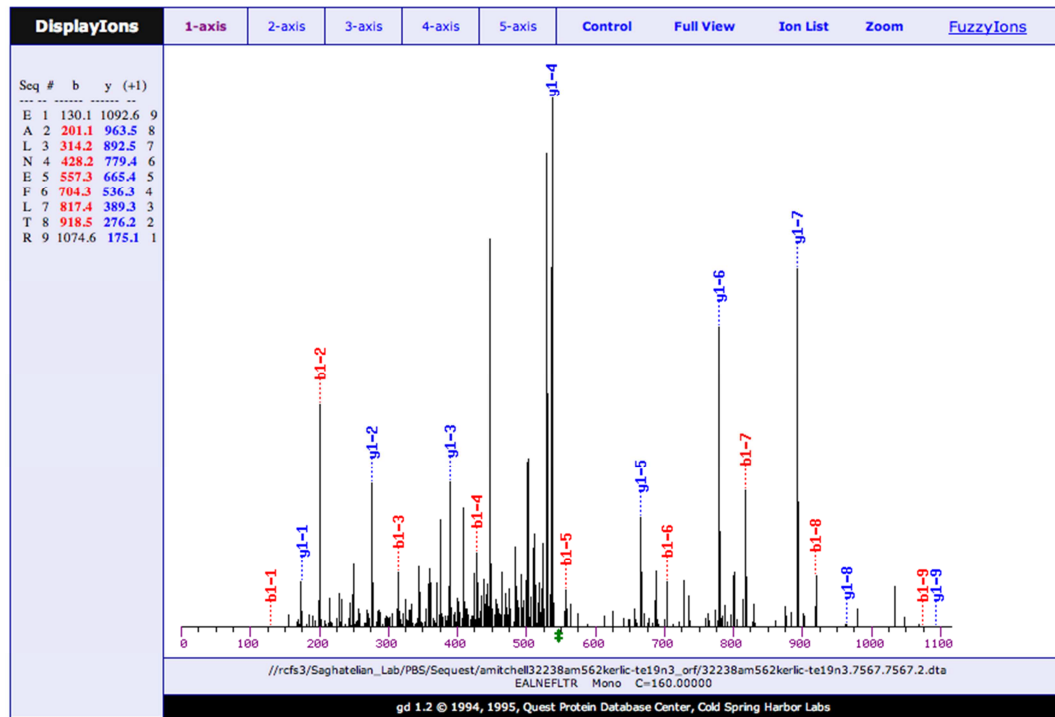

AEPLQTAGQAGR Sf: .83

32238am562kerlic-te14n1 #3892 RT: 51.67 AV: 1 NL: 5.36E3  
 T: ITMS + c NSI d Full ms2 599.81 @cid35.00 [155.00-1210.00]

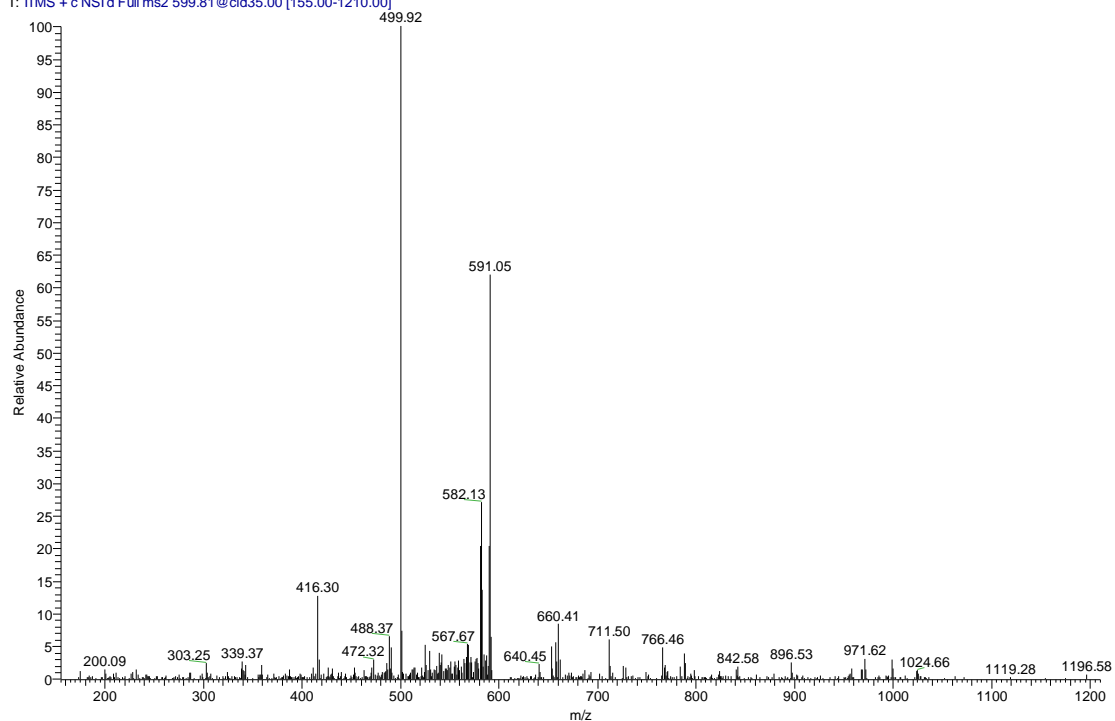

| DisplayIons         | 1-axis | 2-axis | 3-axis | 4-axis | 5-axis | Control | Full View | Ion List | Zoom | FuzzyIons |
|---------------------|--------|--------|--------|--------|--------|---------|-----------|----------|------|-----------|
| Seq # b y (+1)      |        |        |        |        |        |         |           |          |      |           |
| A 1 72.0 1198.6 12  |        |        |        |        |        |         |           |          |      |           |
| E 2 201.1 1127.6 11 |        |        |        |        |        |         |           |          |      |           |
| P 3 298.1 998.5 10  |        |        |        |        |        |         |           |          |      |           |
| L 4 411.2 901.5 9   |        |        |        |        |        |         |           |          |      |           |
| Q 5 539.3 788.4 8   |        |        |        |        |        |         |           |          |      |           |
| T 6 640.3 660.3 7   |        |        |        |        |        |         |           |          |      |           |
| A 7 711.4 559.3 6   |        |        |        |        |        |         |           |          |      |           |
| G 8 768.4 488.3 5   |        |        |        |        |        |         |           |          |      |           |
| Q 9 896.4 431.2 4   |        |        |        |        |        |         |           |          |      |           |
| A 10 967.5 303.2 3  |        |        |        |        |        |         |           |          |      |           |
| G 11 1024.5 232.1 2 |        |        |        |        |        |         |           |          |      |           |
| R 12 1180.6 175.1 1 |        |        |        |        |        |         |           |          |      |           |

  

//rcfs3/Saghatelian\_Lab/PBS/Sequest/amitchell32238am562kerlic-te14n1\_ericdb/32238am562kerlic-te14n1.3892.2.dta  
 AEPLQTAGQAGR Mono C=160.00000

gd 1.2 © 1994, 1995, Quest Protein Database Center, Cold Spring Harbor Labs

AGNLILLQ Sf: .82

32238am562kerlic-te09n2 #4917 RT: 62.56 AV: 1 NL: 4.66E4  
 T: ITMS + c NSI d Full ms2 421.26@cid35.00 [105.00-855.00]

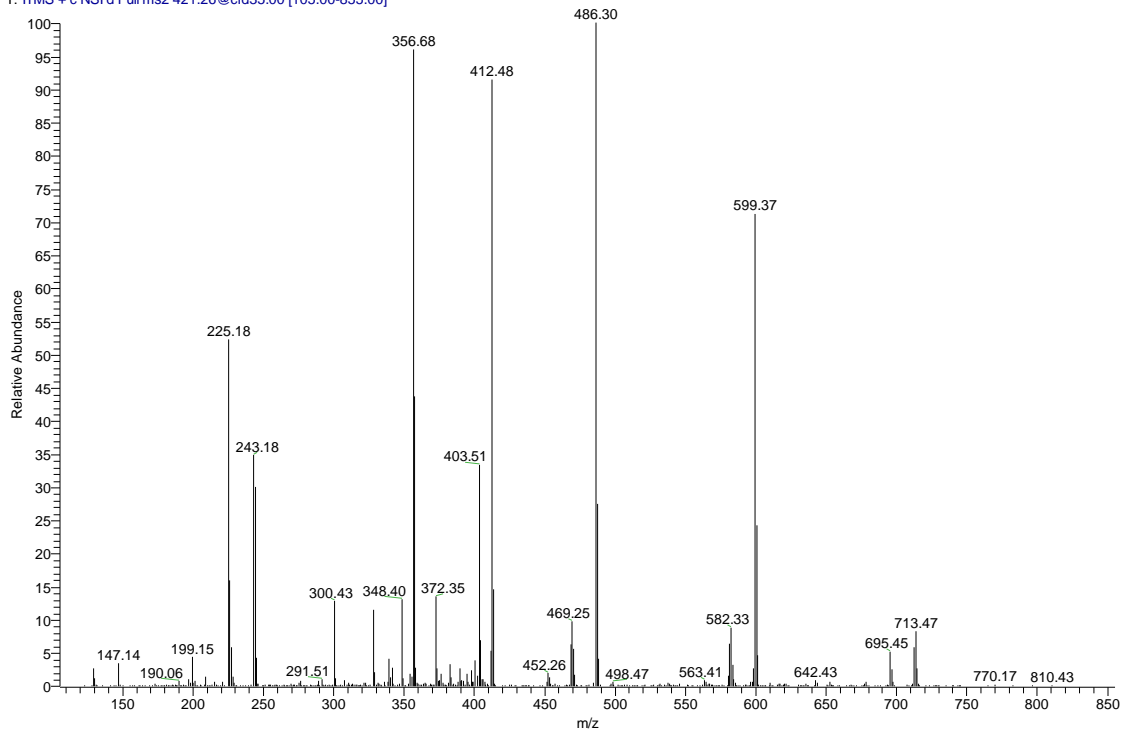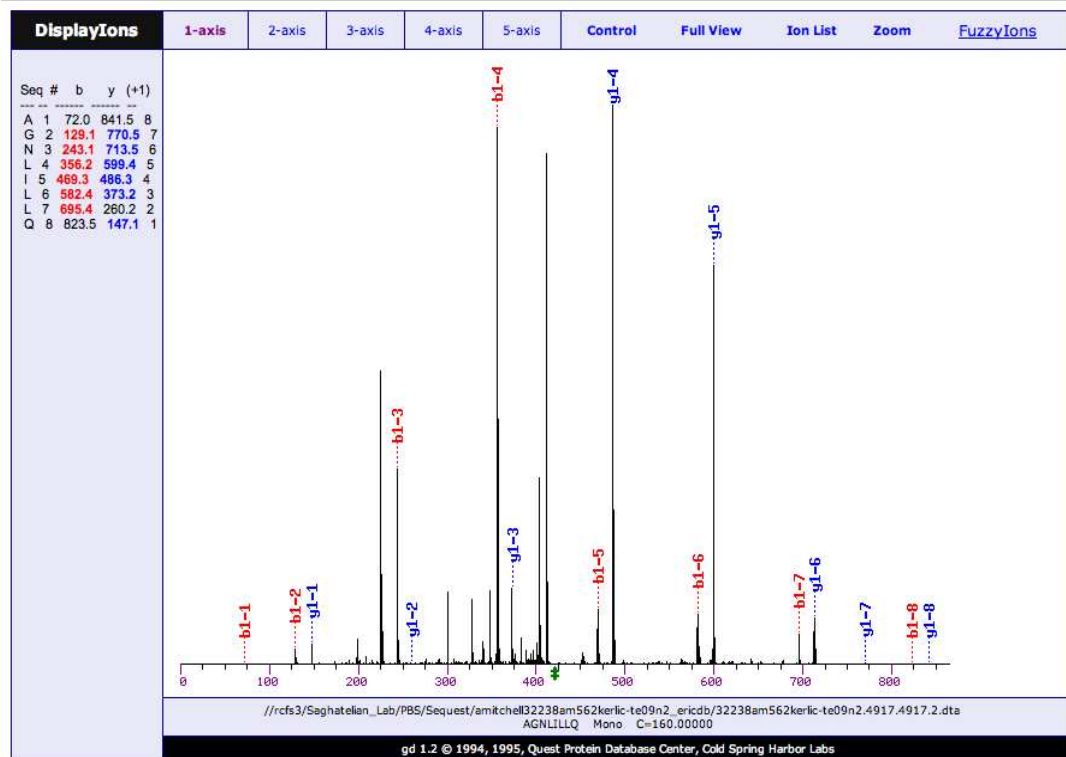

STTIGGMNQR Sf: .77

32238am562kerlic-te26n1 #7966 RT: 88.17 AV: 1 NL: 3.61E3  
 T: ITMS + c NSI d Full ms2 540.76@cid35.00 [135.00-1095.00]

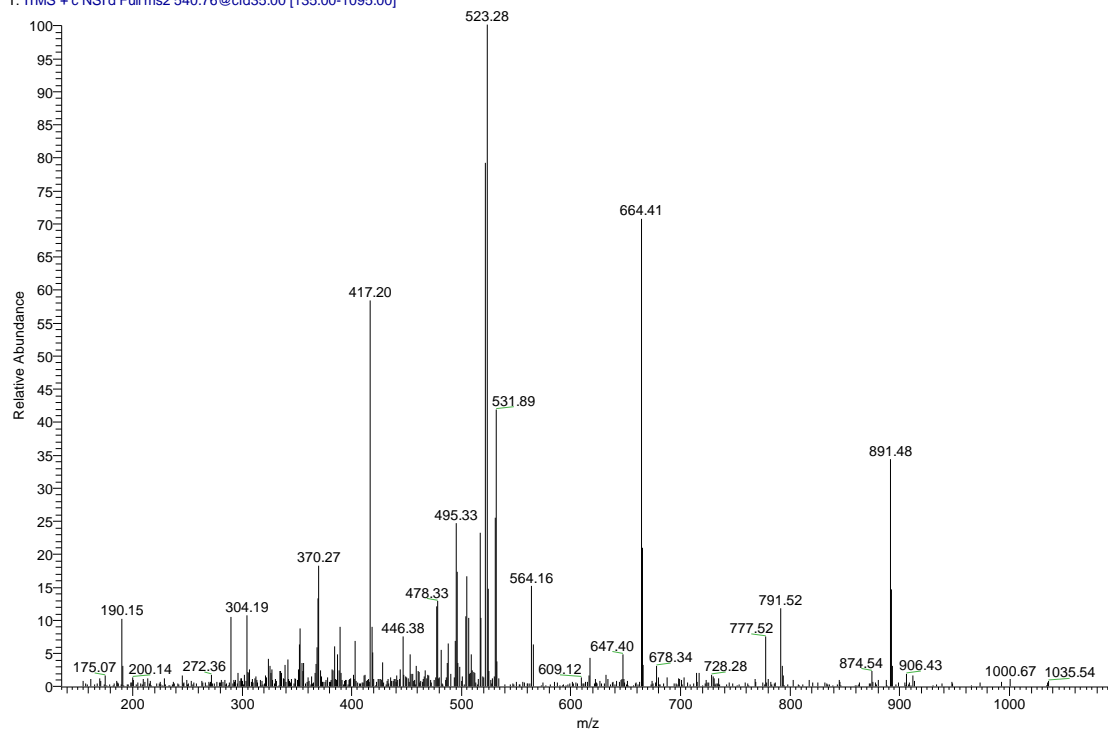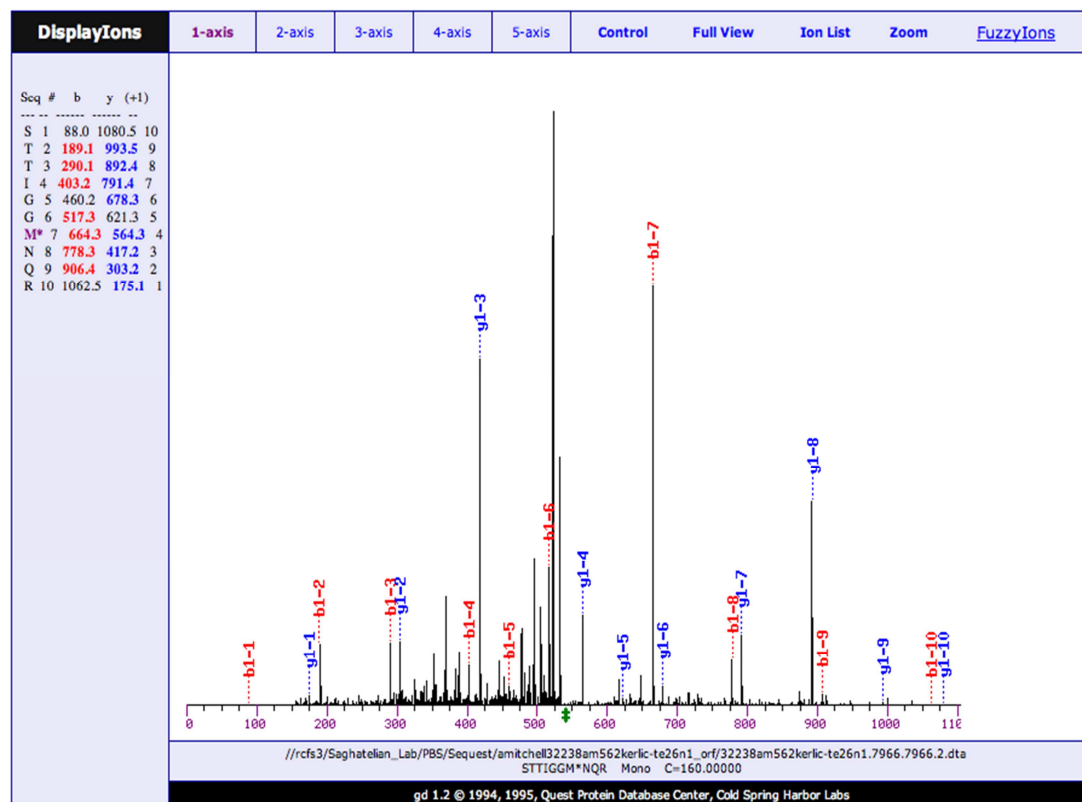

ERPANSLIDQCSQR Sf: .8

32375562k10kda2-e17ft #8516 RT: 78.82 AV: 1 NL: 1.05E4  
 T: ITMS + c NSI.d Full ms2 837.40@cid35.00 [220.00-1685.00]

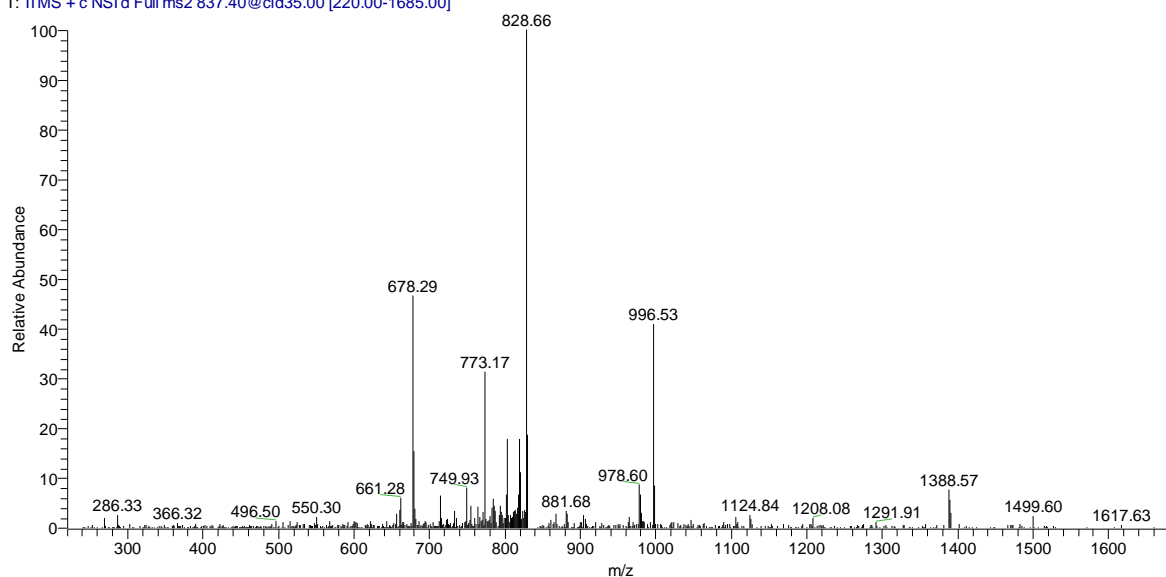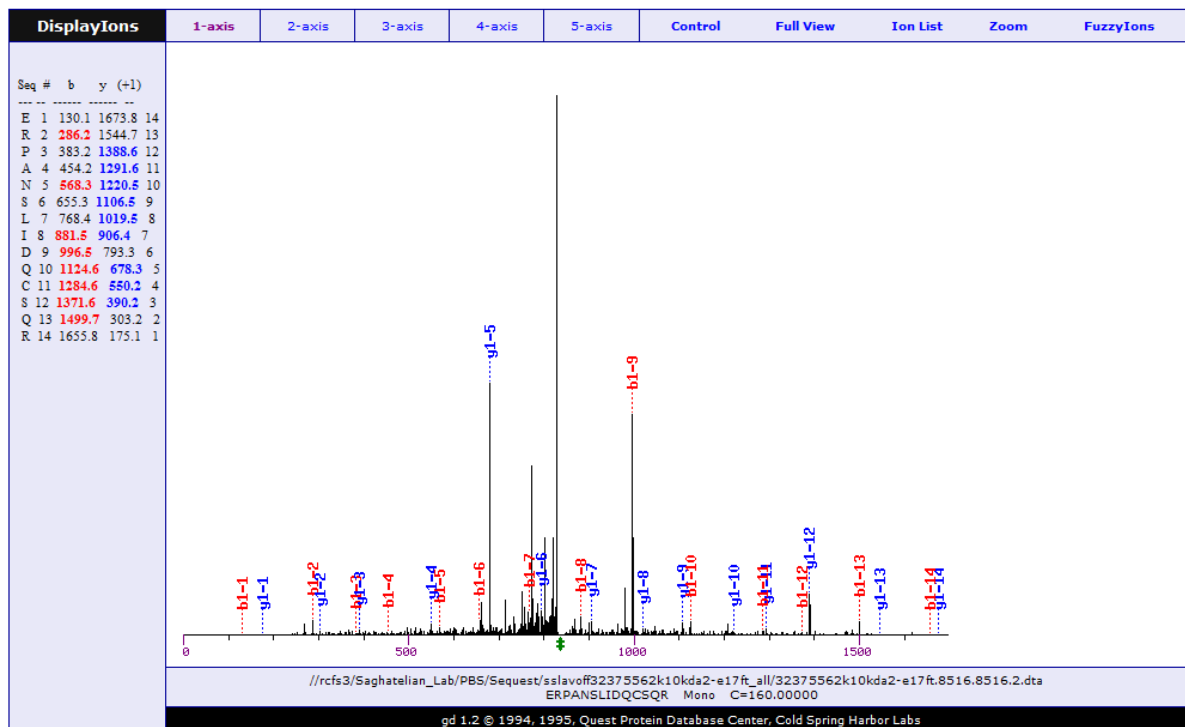

VFFKNLLAFAR Sf: .90



32238am562keric-te14n1 #7006 RT: 77.45 AV: 1 NL: 8.36E3  
 T: ITMS + c NSI d Full ms2 663.39@cid35.00 [170.00-2000.00]

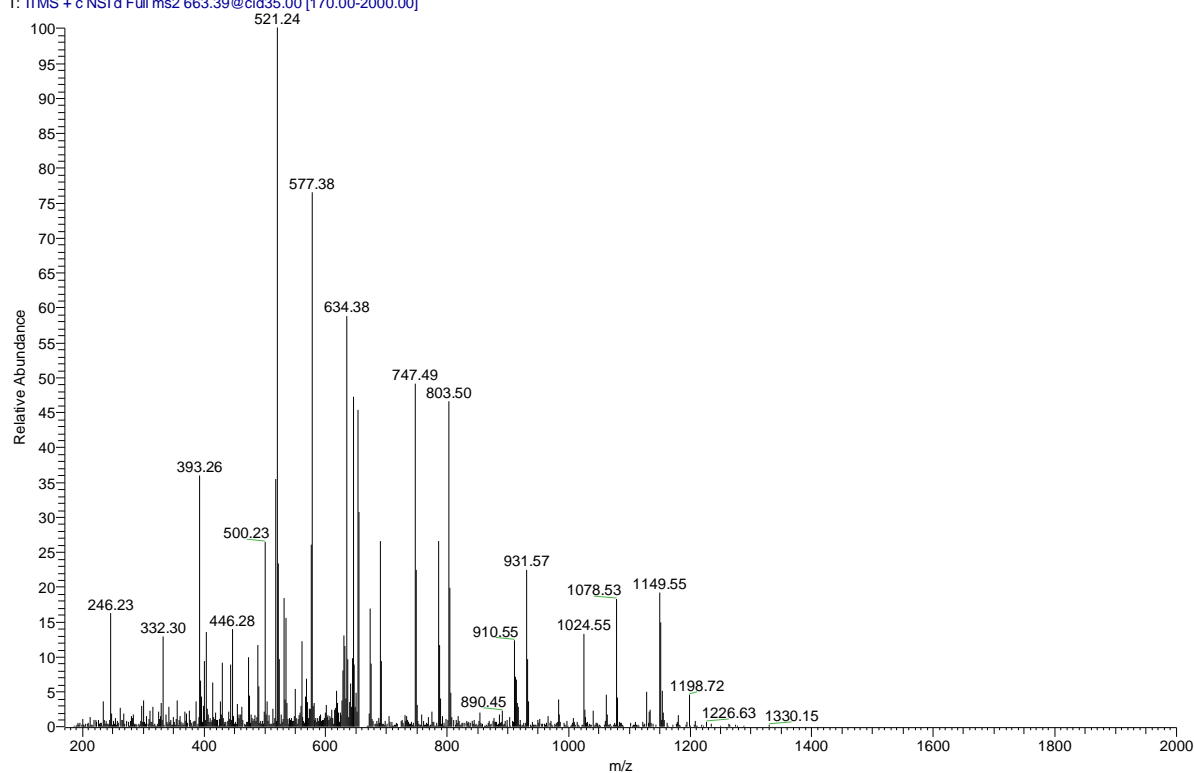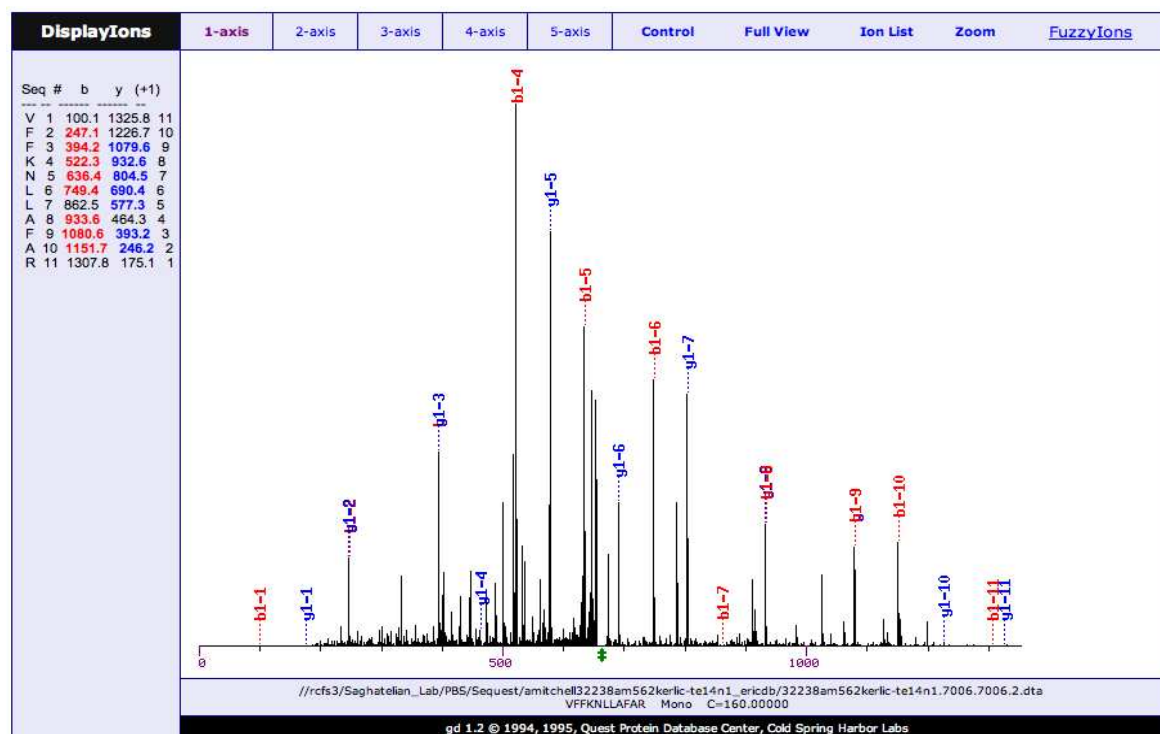

AELSFLNR: .84

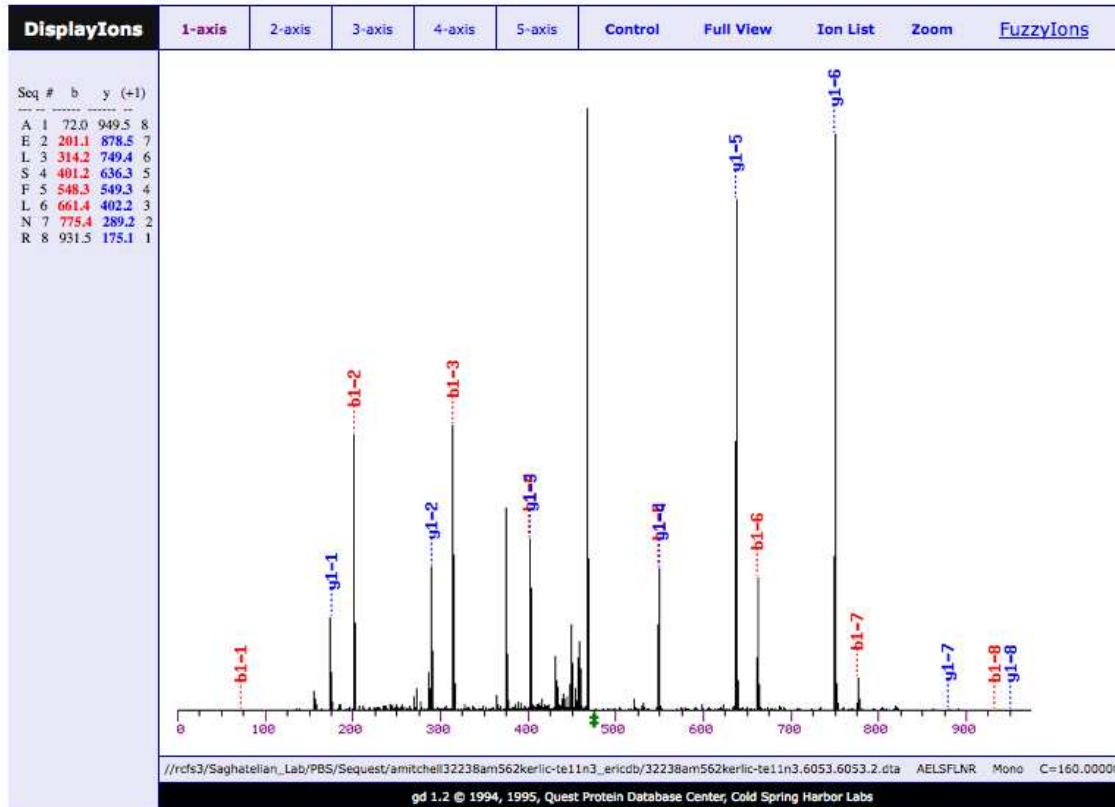

C:\Users\...32238am562kerlic-te11n3    10/4/2010 4:25:10 PM    32238AM562KERLIC-TE11N3  
 IF121005cm5um PF2457523cm3um ERLIC run N=3  
 32238am562kerlic-te11n3 #6053 RT: 70.31 AV: 1 NL: 1.64E4  
 T: ITMS + c NSI d Full ms2 476.76@cid35.00 [120.00-965.00]

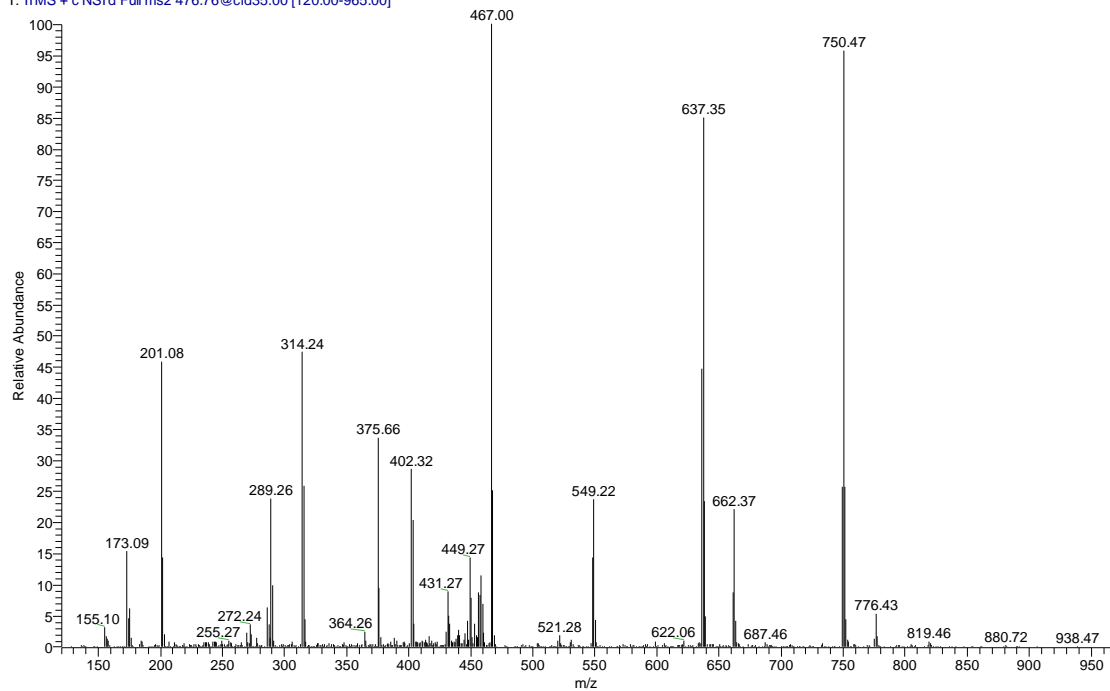

LLPLGASPAGVVGGGLAPPR Sf: .93

32375562k10kda2-e08ft#15520 RT: 139.85 AV: 1 NL: 9.31E3  
 T: ITMS + c NSI d Full ms2 900.03@cid35.00 [235.00-1815.00]

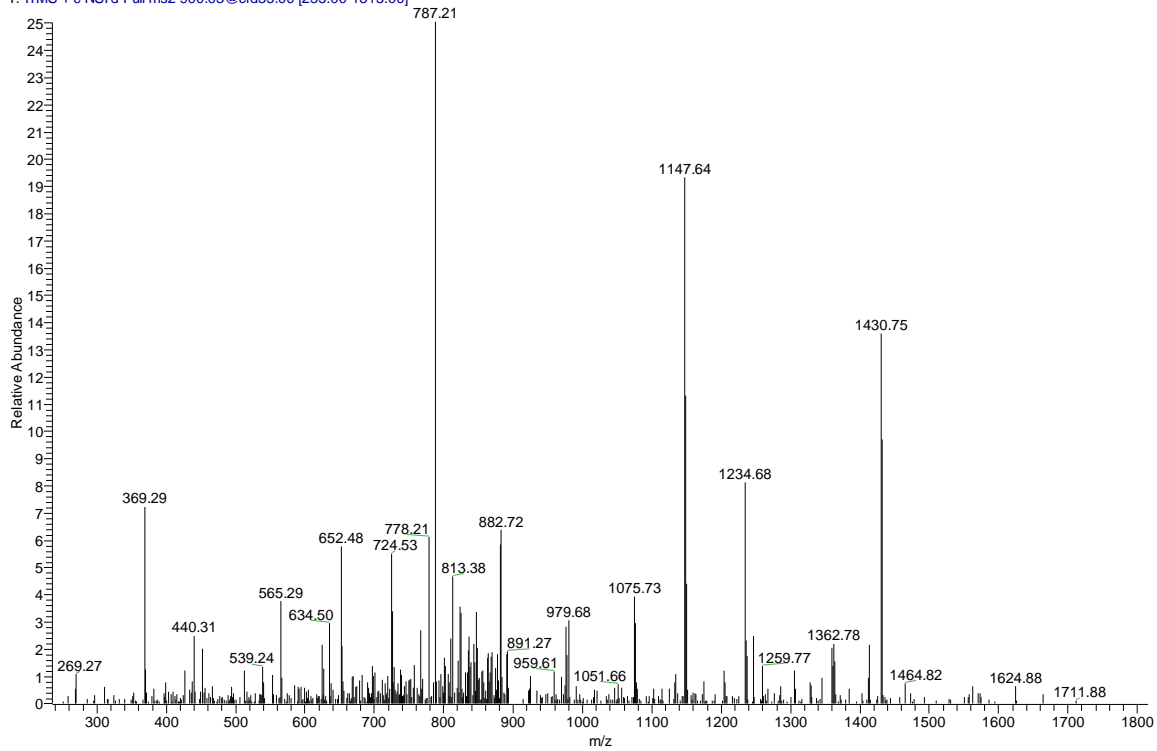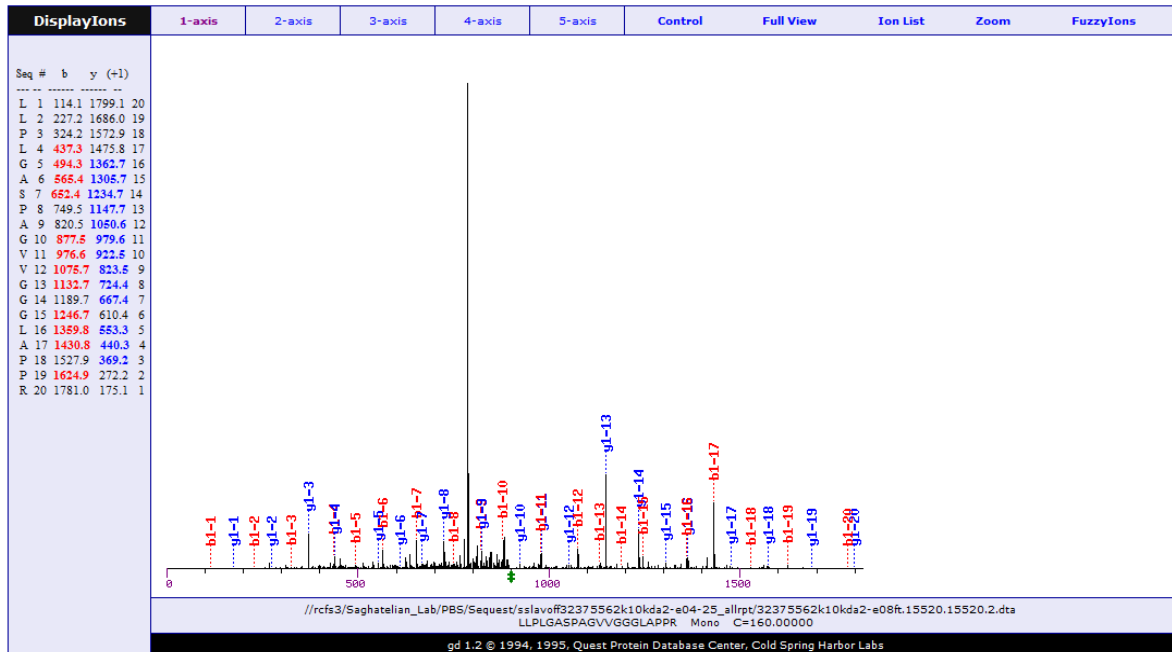

TWLPSCEDLTLPGGR Sf: .92

32375562k10kda2-e21ft#17544 RT: 141.48 AV: 1 NL: 3.91E3  
T: ITMS + c NSI d Full ms2 851.41 @cid35.00 [220.00-1715.00]

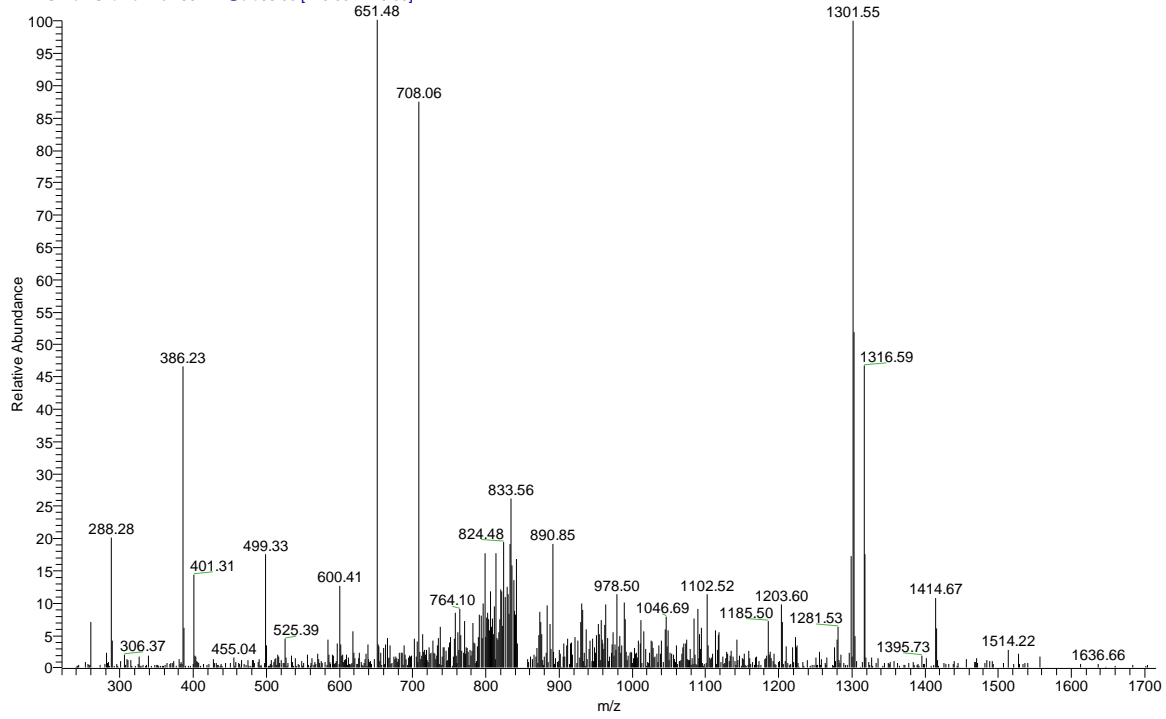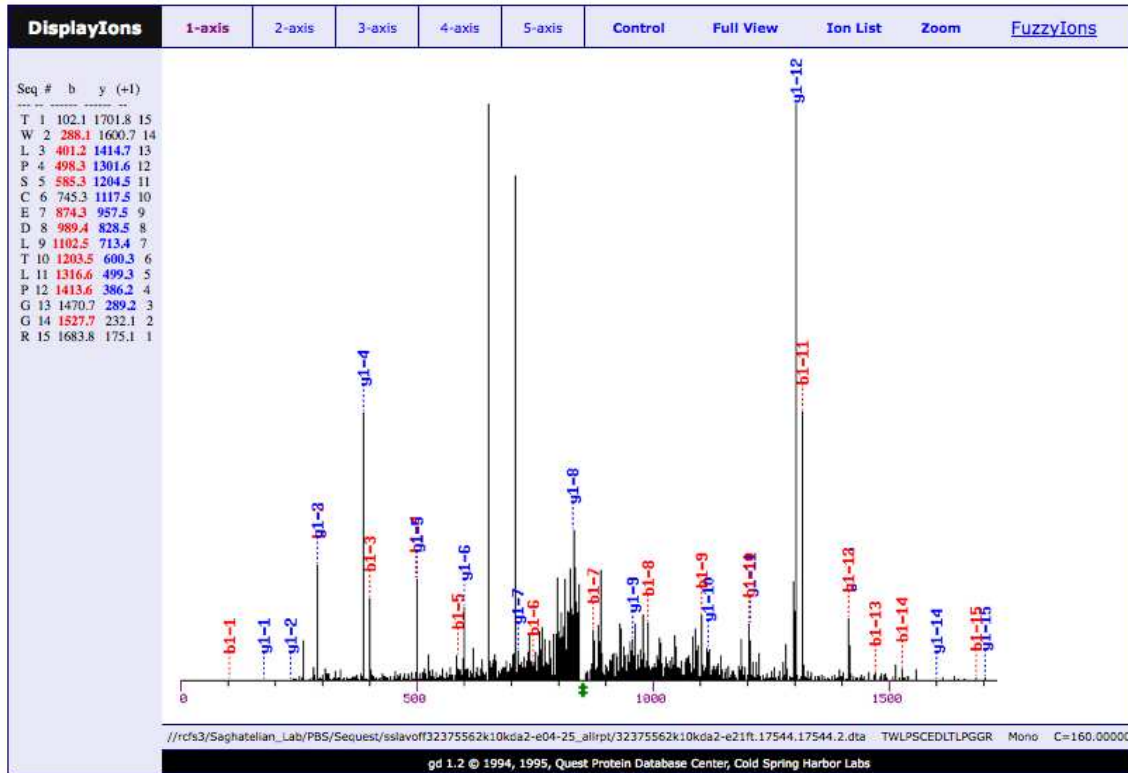

FLPVDLSLLR Sf: .78

32238am562kerlic-te08n3 #9802 RT: 113.26 AV: 1 NL: 6.90E3  
 T: ITMS + c NSI d Full ms2 586.86@cid35.00 [150.00-1185.00]

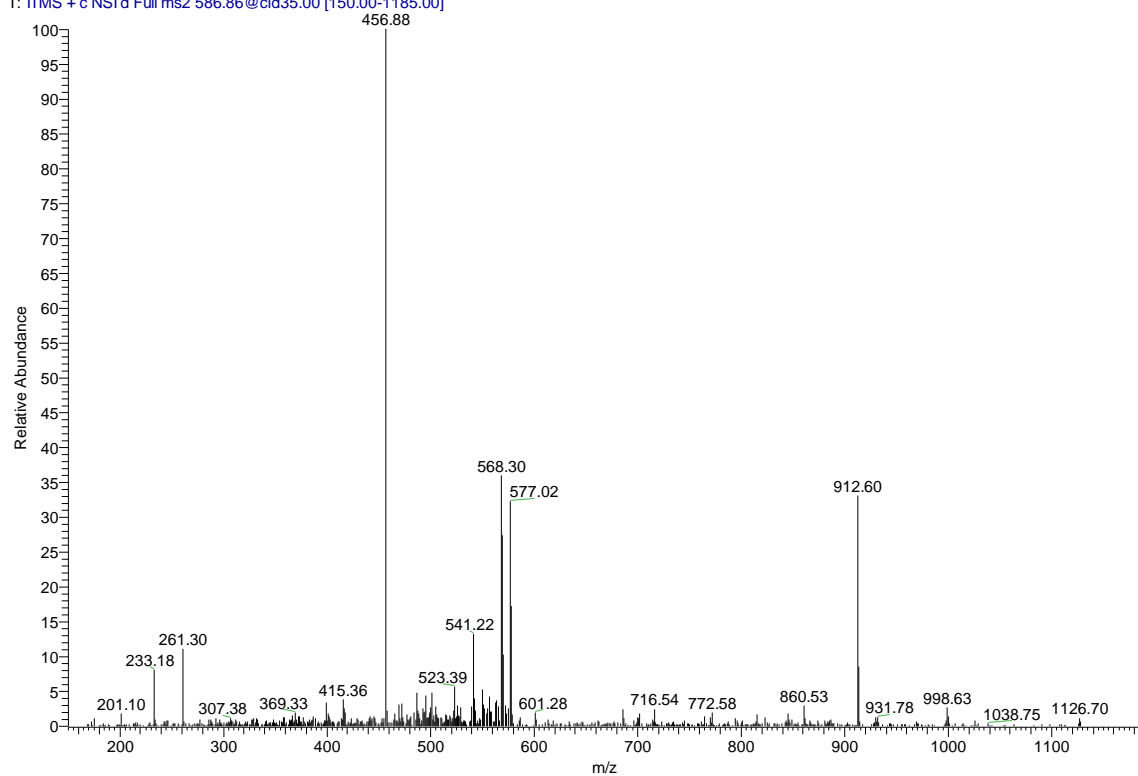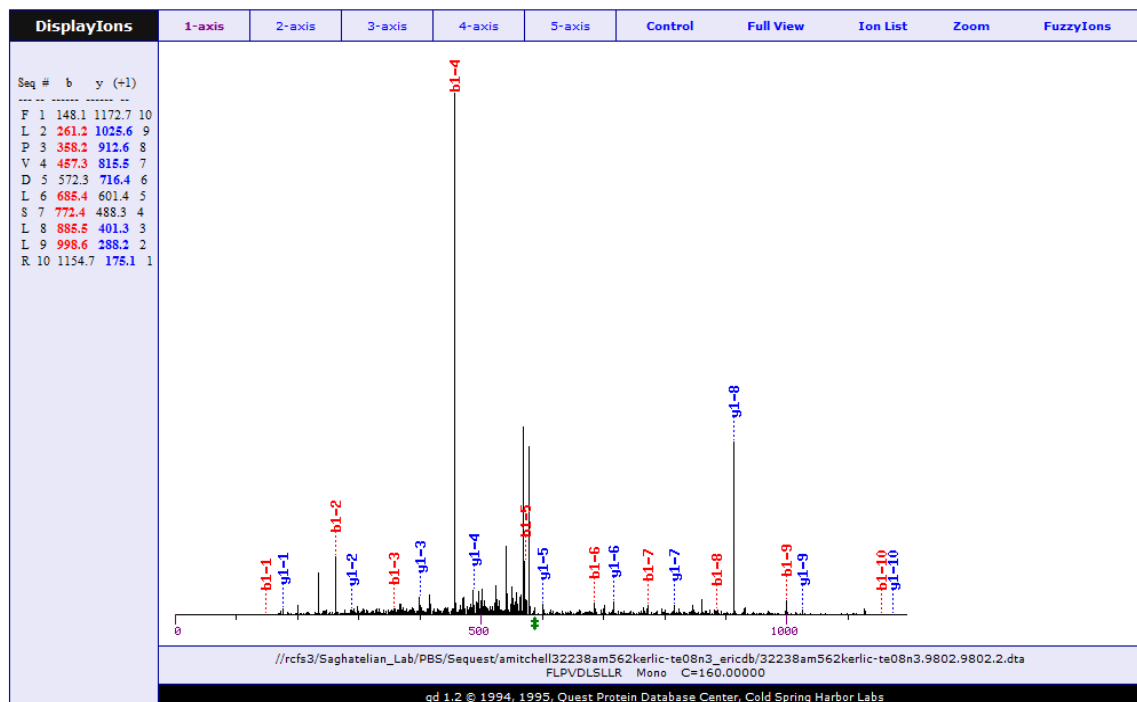

SLSSYGACSR Sf: .89

32238am562kerlic-te32n1 #2475 RT: 42.72 AV: 1 NL: 1.09E3  
 T: ITMS + c NSI d Full ms2 544.24@cid35.00 [135.00-1100.00]

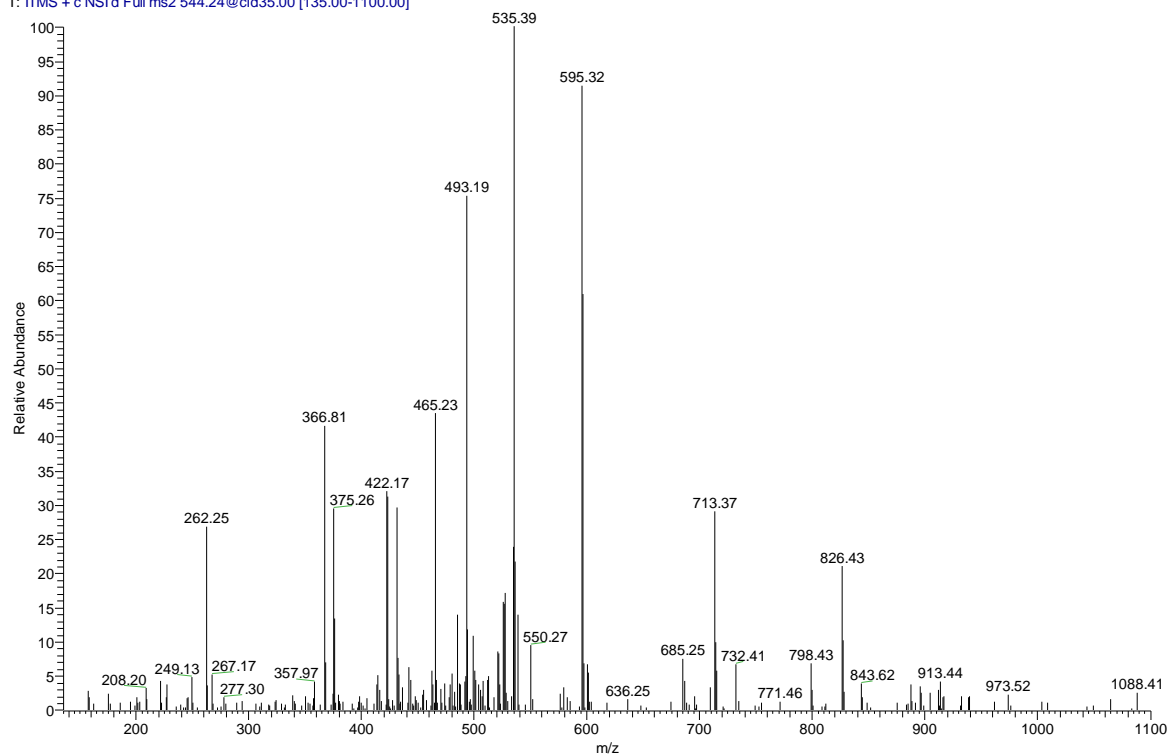

| DisplayIons                                                                                                                                                                                                                                                                         | 1-axis | 2-axis | 3-axis | 4-axis | 5-axis | Control | Full View | Ion List | Zoom | FuzzyIons |
|-------------------------------------------------------------------------------------------------------------------------------------------------------------------------------------------------------------------------------------------------------------------------------------|--------|--------|--------|--------|--------|---------|-----------|----------|------|-----------|
| <p>Seq # b y (+1)</p> <p>S 1 88.0 1087.5 10</p> <p>L 2 201.1 1000.4 9</p> <p>S 3 288.2 887.3 8</p> <p>S 4 375.2 800.3 7</p> <p>Y 5 538.3 713.3 6</p> <p>G 6 595.3 550.2 5</p> <p>A 7 666.3 493.2 4</p> <p>C 8 826.3 422.2 3</p> <p>S 9 913.3 262.2 2</p> <p>R 10 1069.4 175.1 1</p> |        |        |        |        |        |         |           |          |      |           |
| <p>//rcfs3/Seghatehian_Lab/PBS/Sequest/amitchell32238am562kerlic-te32n1_ericob/32238am562kerlic-te32n1_2475.2475.2.dta SLSSYGACSR Mono C=160.00000</p> <p>gd 1.2 © 1994, 1995, Quest Protein Database Center, Cold Spring Harbor Labs</p>                                           |        |        |        |        |        |         |           |          |      |           |

GPSGTQEMGPLSR Sf: .95

32238am562kerlic-te13n1 #5346 RT: 64.95 AV: 1 NL: 5.31E3  
 T: ITMS + c NSI d Full ms2 658.82@cid35.00 [170.00-1330.00]

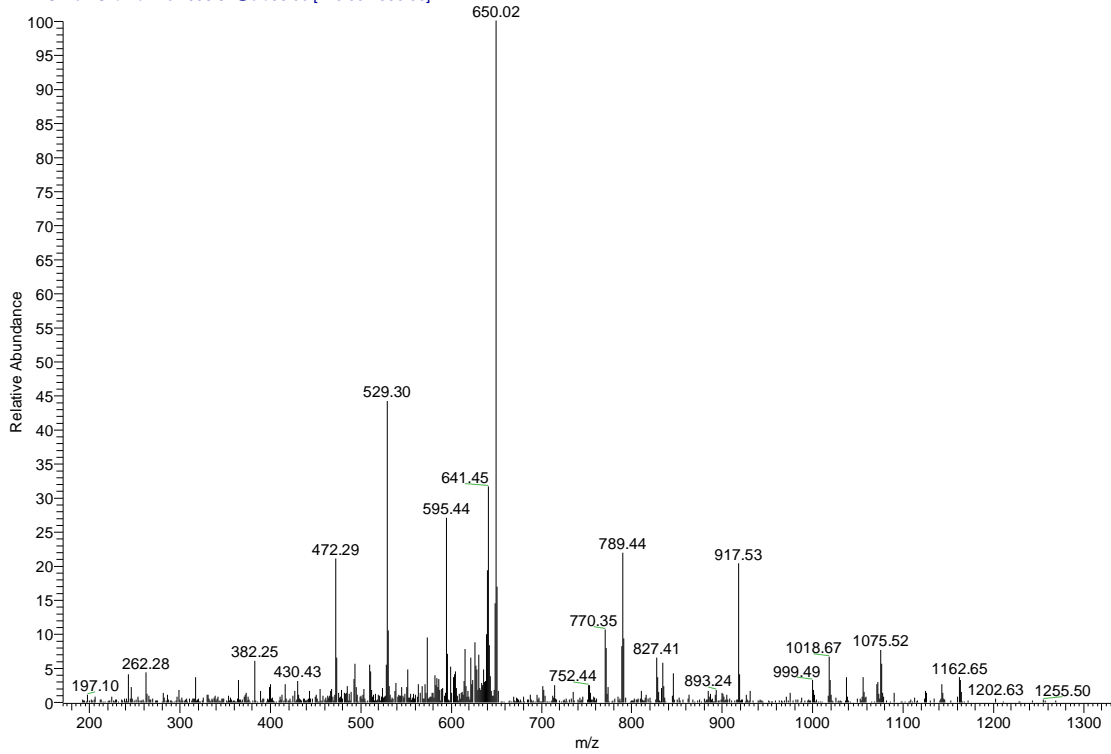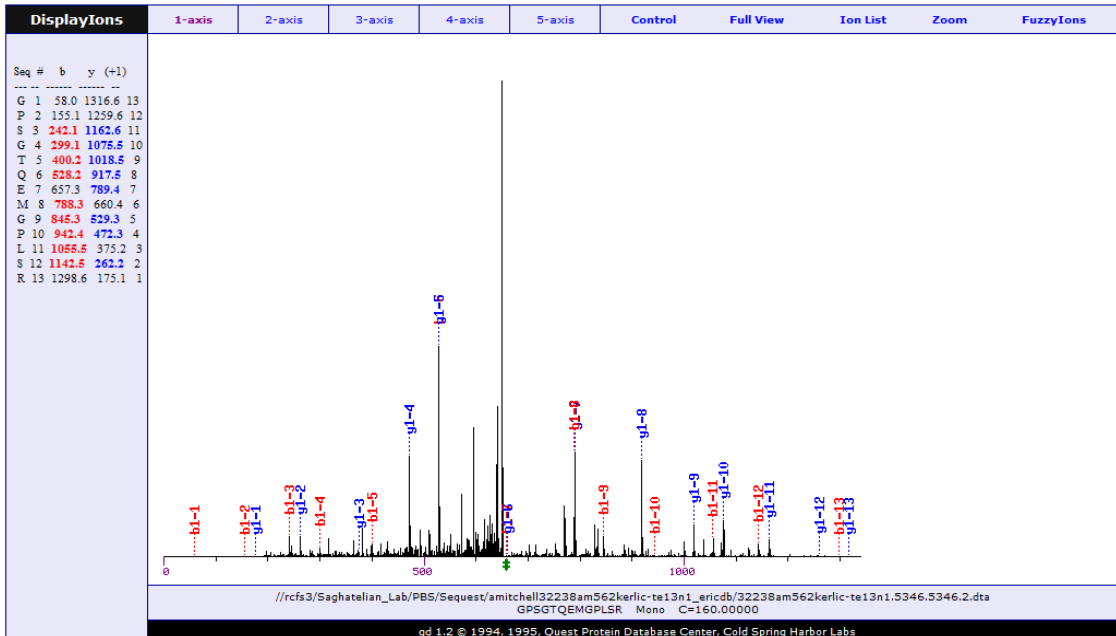

APEPGAVLAPAEVVL R Sf: .95

32238am562kerlic-te14n1 #8891 RT: 95.31 AV: 1 NL: 2.04E3  
 T: ITMS + c NSI d Full ms2 794.96@cid35.00 [205.00-1600.00]

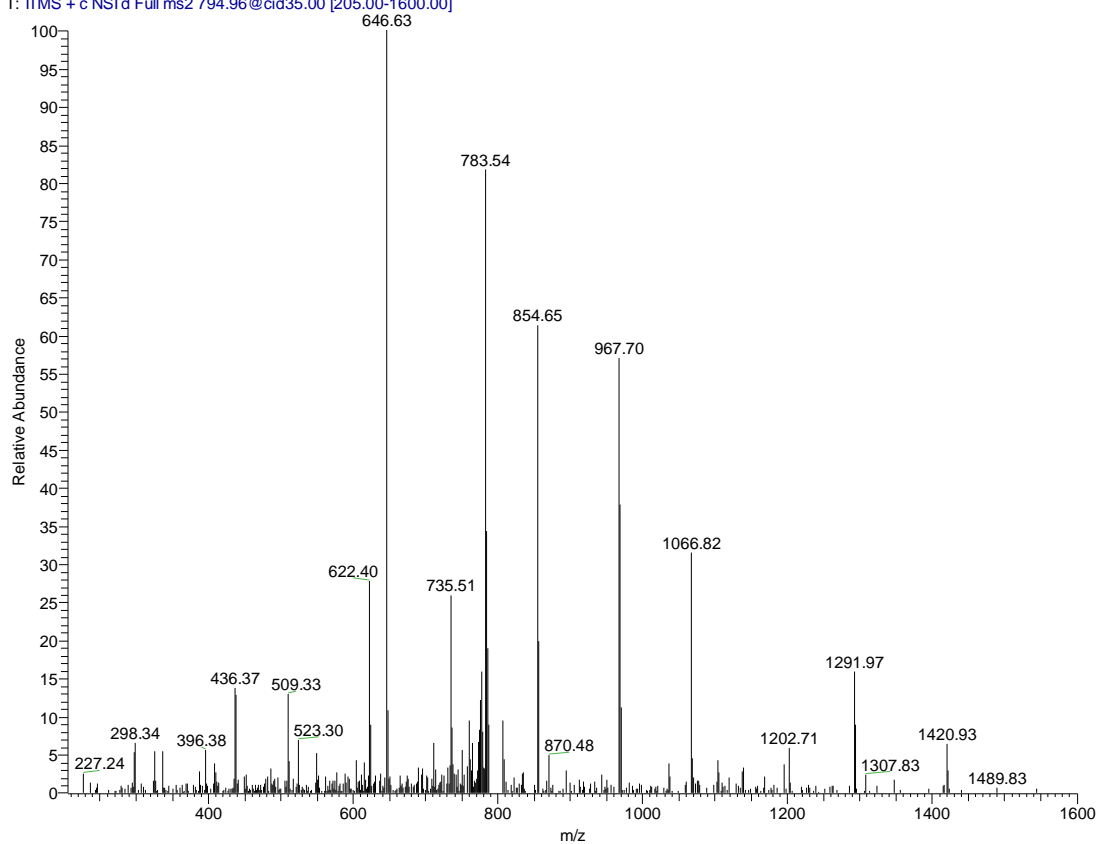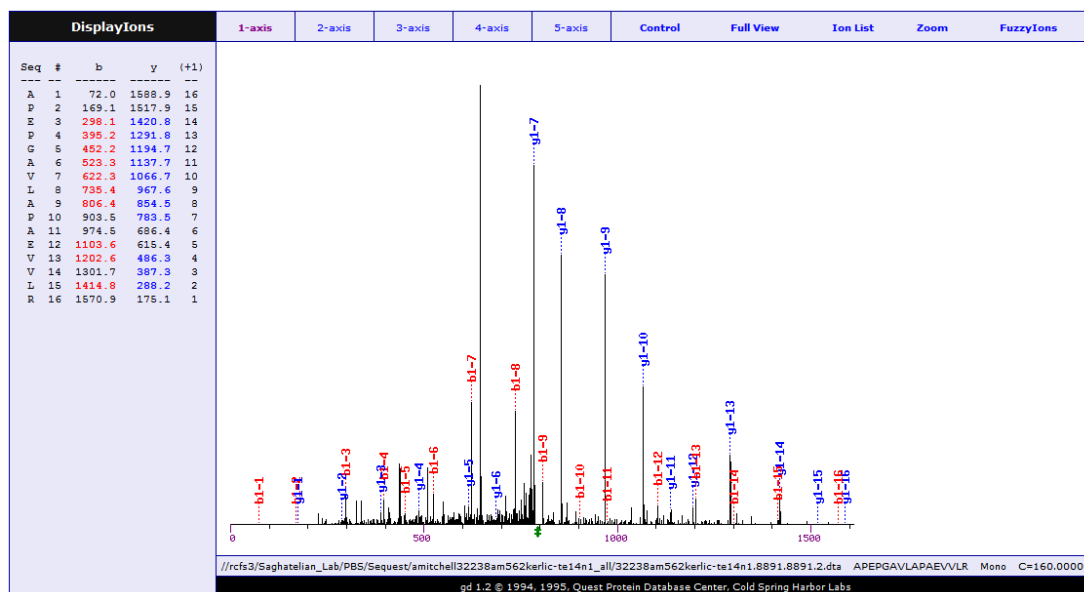

LLVSGSPSAETLPLR Sf: .94



32238am562kerlic-te08n1 #7404 RT: 87.62 AV: 1 NL: 2.32E3  
 T: ITMS + c NSI d Full ms2 770.44@cid35.00 [200.00-1555.00]

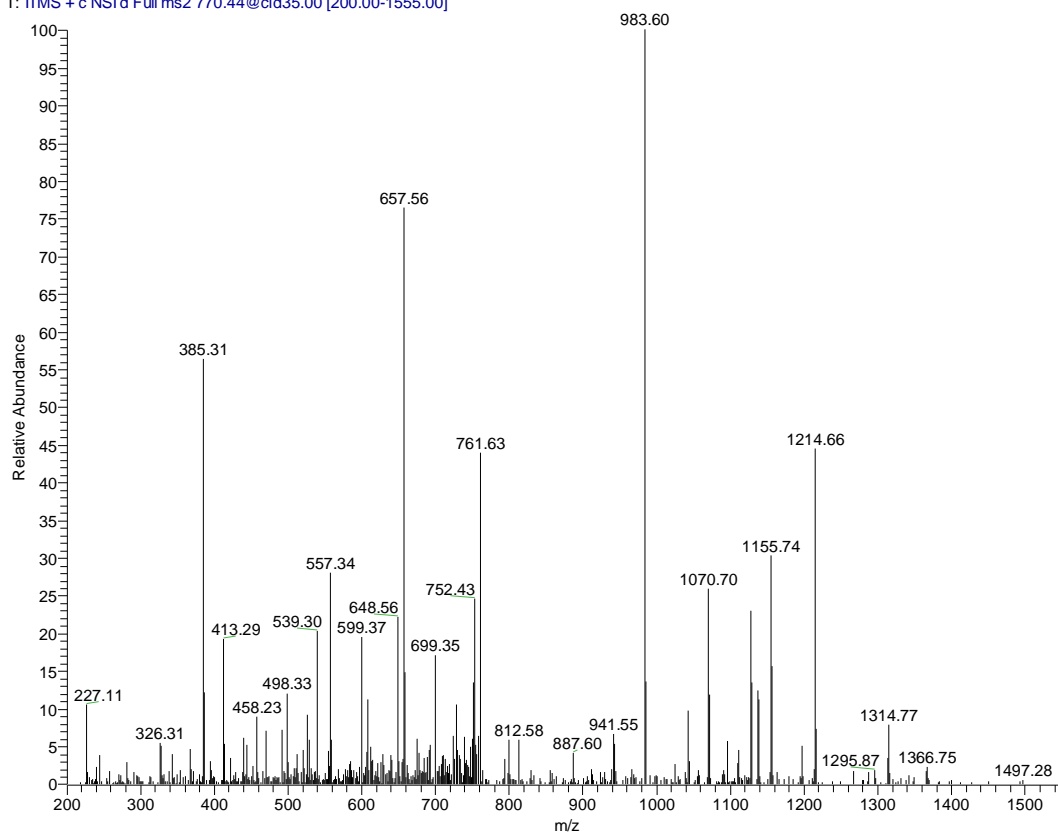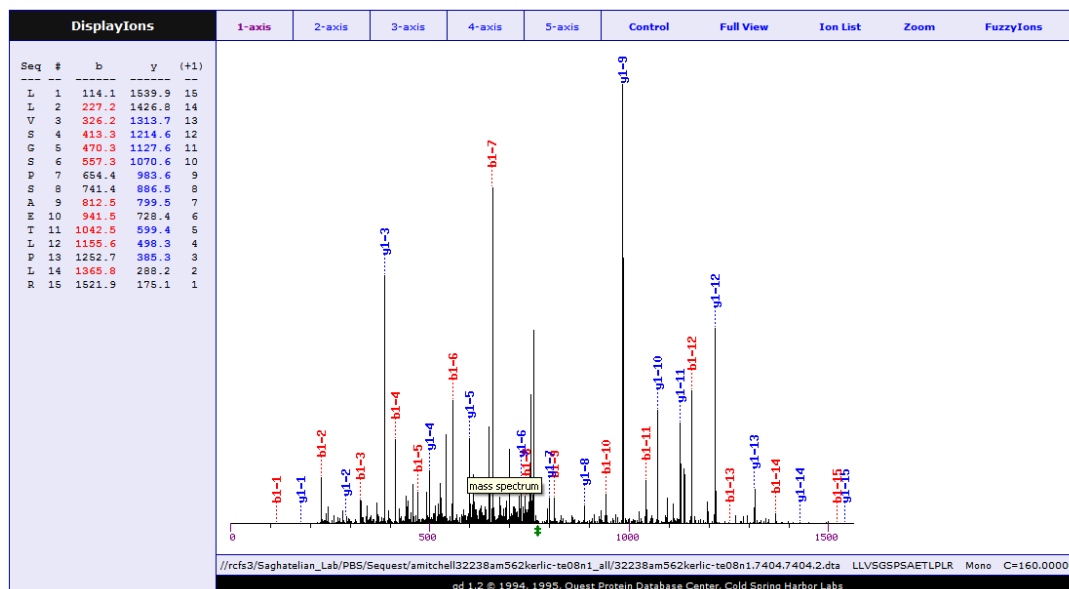

ALAQGSLTPSQIYSA Sf: .95

32238am562kerlic-te14n1 #7916 RT: 85.98 AV: 1 NL: 2.47E3  
 T: ITMS + c NSI d Full ms2 753.89@cid35.00 [195.00-1520.00]

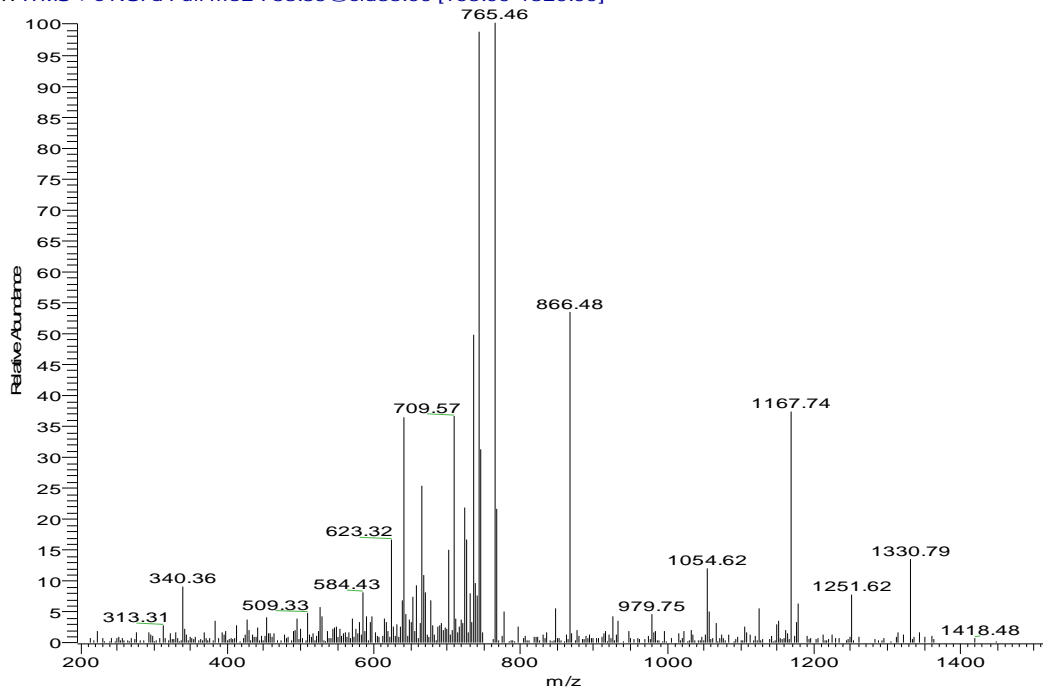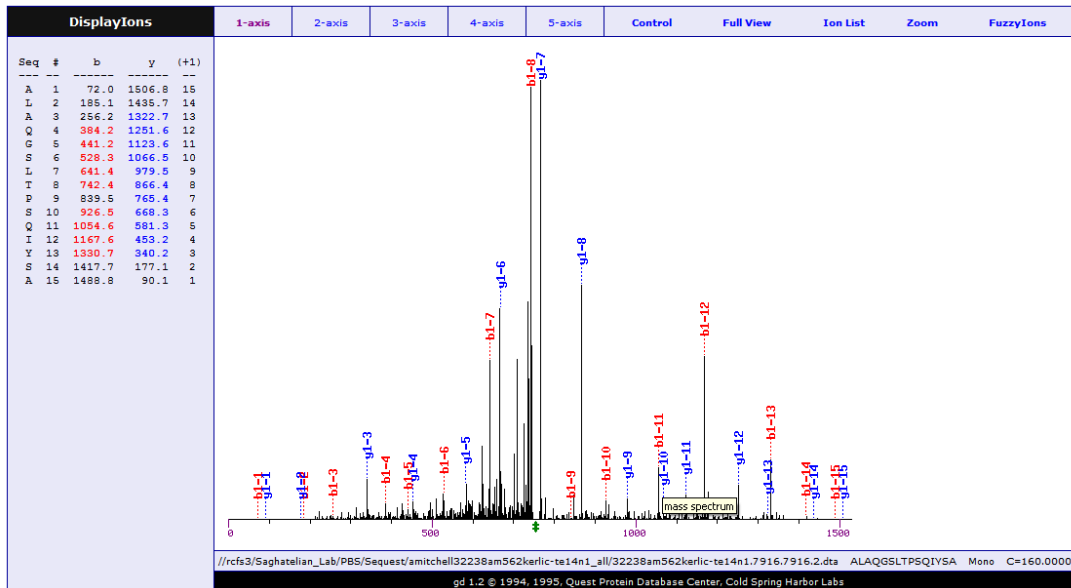

LSAPQPGPDILQAPAR Sf: .93

32238am562kerlic-te13n1 #7432 RT: 81.81 AV: 1 NL: 5.29E3  
 T: ITMS + c NSI d Full ms2 815.95@cid35.00 [210.00-1645.00]

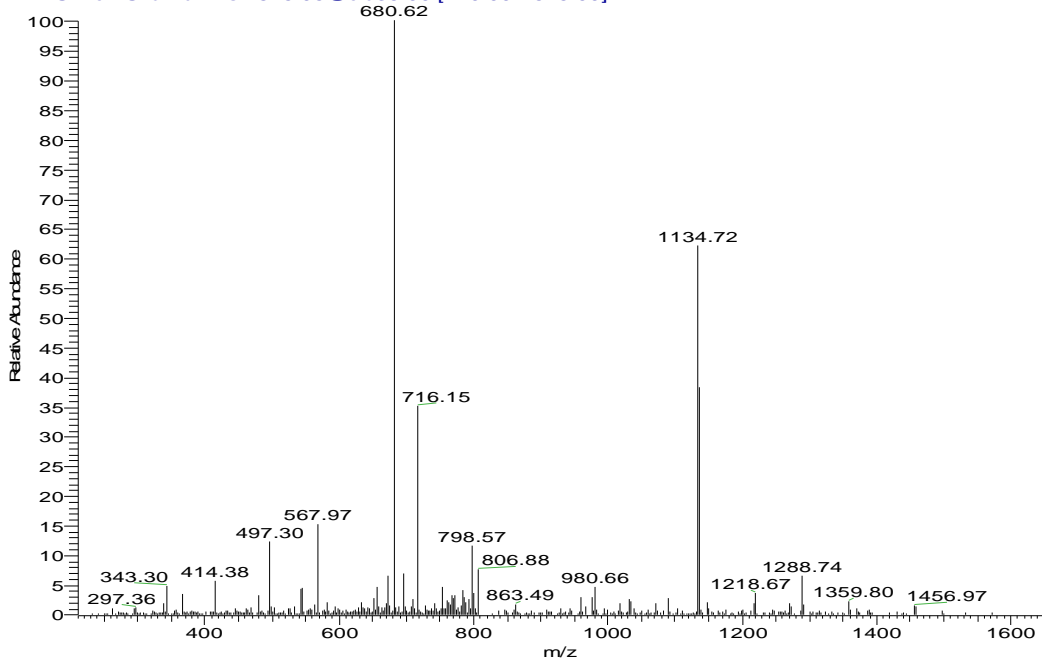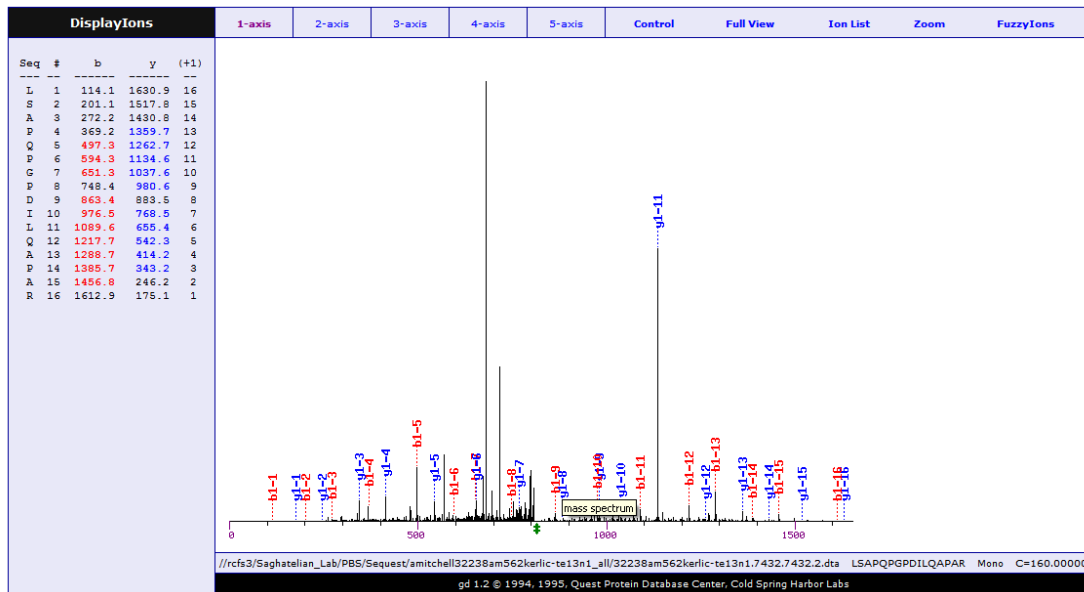

YIYFQPVFEEQYAK Sf: .92

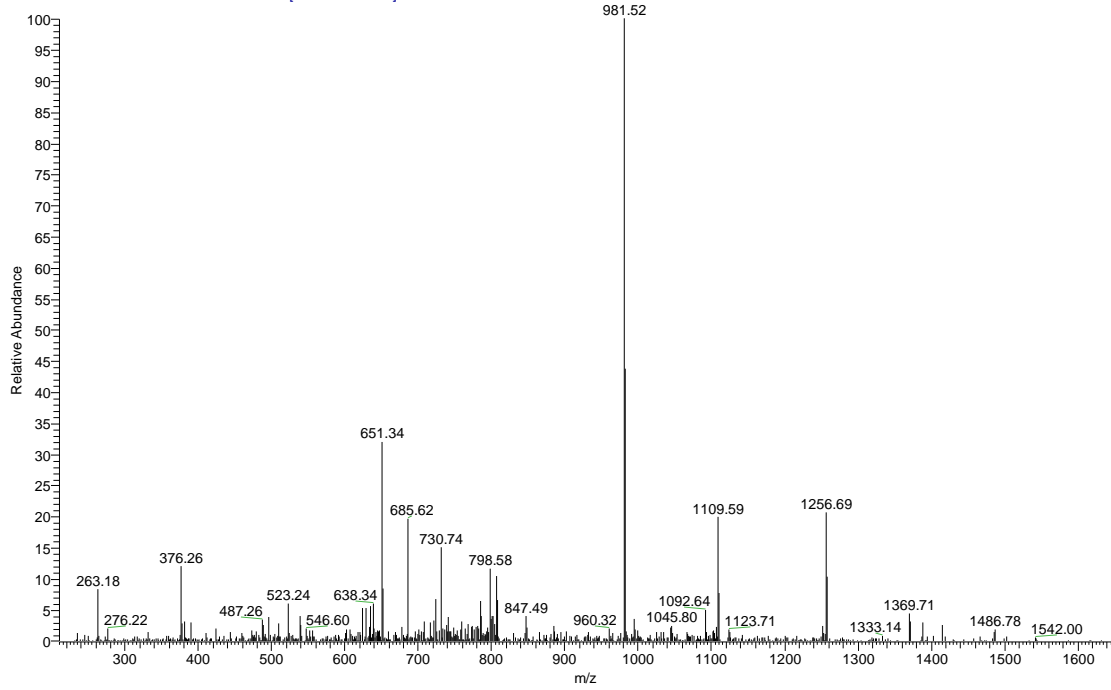

| Display Ions                                                                                                                                                                                                                                                                                        | 1-axis | 2-axis | 3-axis | 4-axis | 5-axis | Control | Full View | Ion List | Zoom | Fuzzy Ions |
|-----------------------------------------------------------------------------------------------------------------------------------------------------------------------------------------------------------------------------------------------------------------------------------------------------|--------|--------|--------|--------|--------|---------|-----------|----------|------|------------|
| <pre> Seq #  b  y (+1) V 1 100.1 1631.8 13 Y 2 263.1 1532.8 12 I 3 376.2 1369.7 11 F 4 523.3 1256.6 10 Q 5 651.4 1109.6 9 P 6 748.4 981.5 8 V 7 847.5 884.5 7 F 8 994.5 785.4 6 E 9 1123.6 638.3 5 Q 10 1251.6 509.3 4 Y 11 1414.7 381.2 3 A 12 1485.7 218.2 2 K 13 1613.8 147.1 1           </pre> |        |        |        |        |        |         |           |          |      |            |
| <p>//rfs3/Saghatelian_Lab/PBS/Sequest/amitchell/32238am562kerlic-te10n2_all/32238am562kerlic-te10n2.10877.10877.2.dta VY1FQPVFQYAK Mono C=160.00000</p> <p>gd 1.2 © 1994, 1995, Quest Protein Database Center, Cold Spring Harbor Labs</p>                                                          |        |        |        |        |        |         |           |          |      |            |

NEQTELLYNK Sf: .90

32238am562kerlic-te35n3 #8893 RT: 106.93 AV: 1 NL: 1.66E3  
 T: ITMS + c NSI d Full ms2 626.32@cid35.00 [160.00-1265.00]

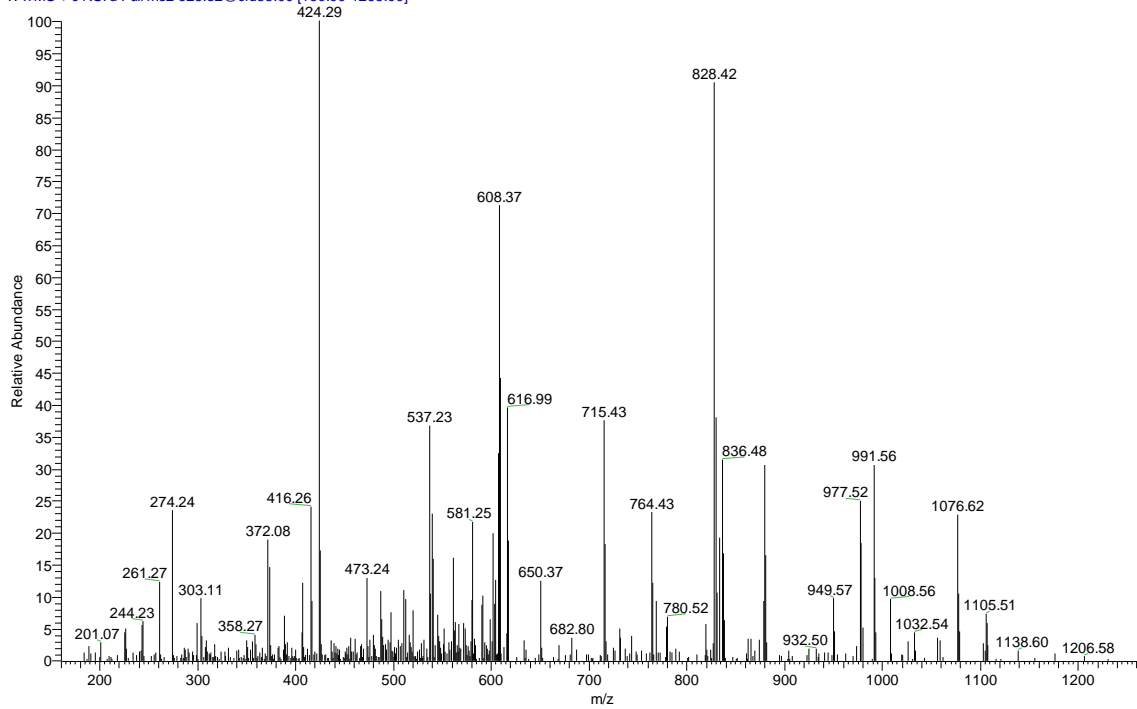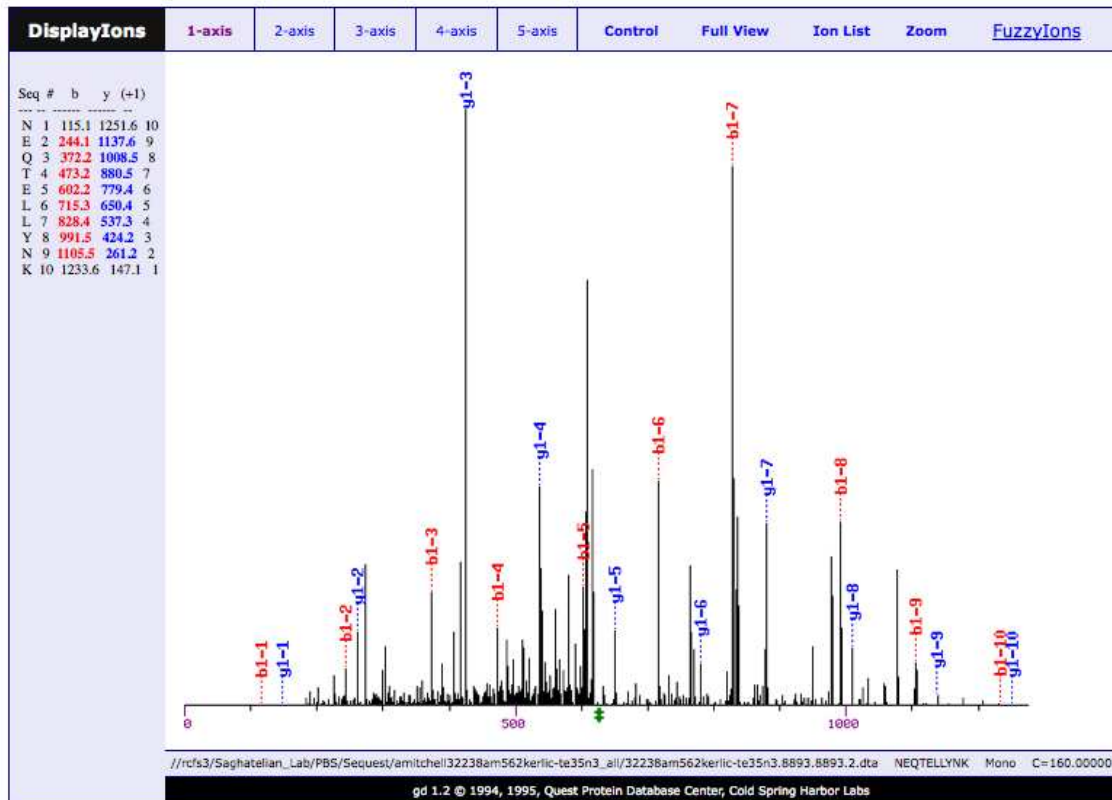

ILEDFLPSSSRPQS Sf: .84

32238am562kerlic-te23n3 #8258 RT: 105.94 AV: 1 NL: 2.97E3  
 T: ITMS + c NSI d Full ms2 836.93@cid35.00 [220.00-1685.00]

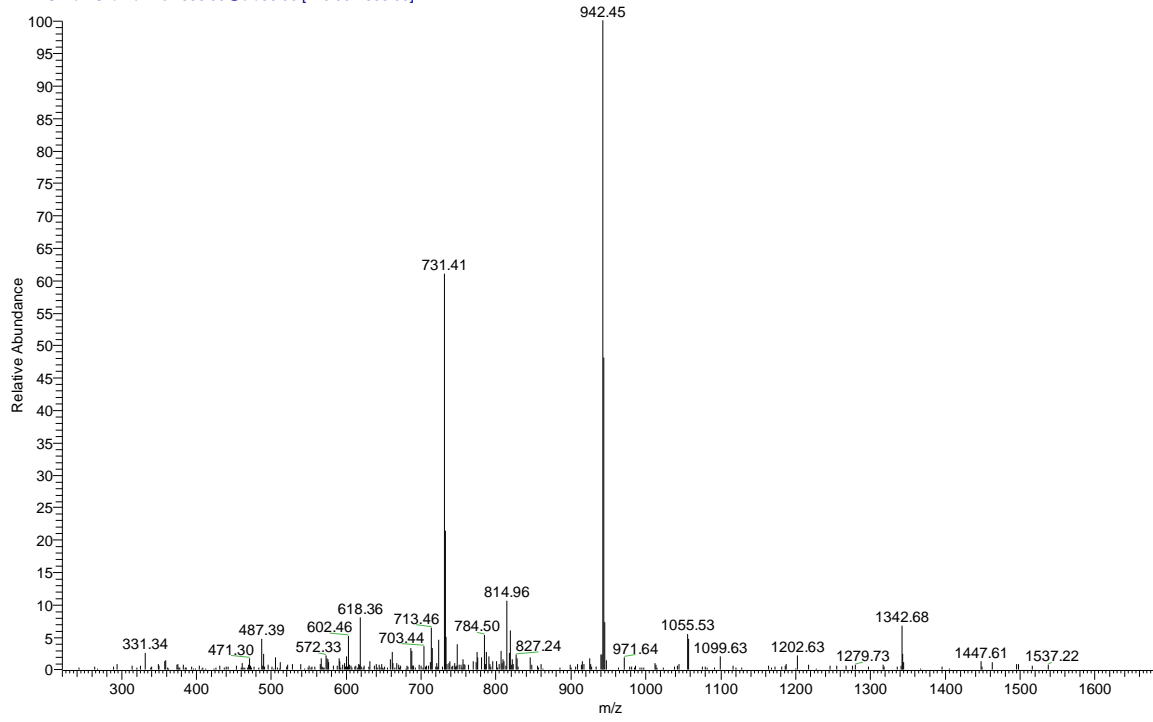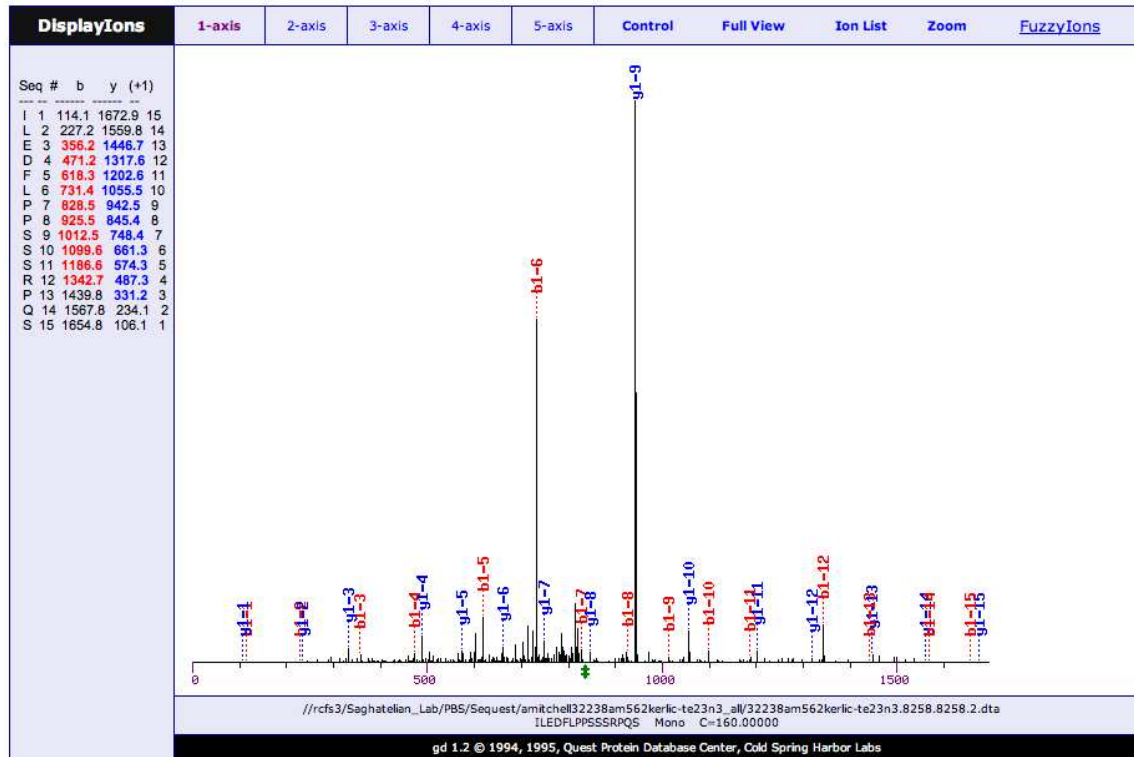

# DLPGVAPRPSLSLSPG Sf: .83

C:\Users\... \32238am562kerlic-te13n3  
 IF121005cm5um PF2457523cm3um ERLIC run N=3

10/5/2010 11:19:28 AM

32238AM562KERLIC-TE13N3

32238am562kerlic-te13n3 #8728 RT: 91.26 AV: 1 NL: 6.91E3  
 T: ITMS + c NSI d Full ms2 830.46@cid35.00 [215.00-1675.00]

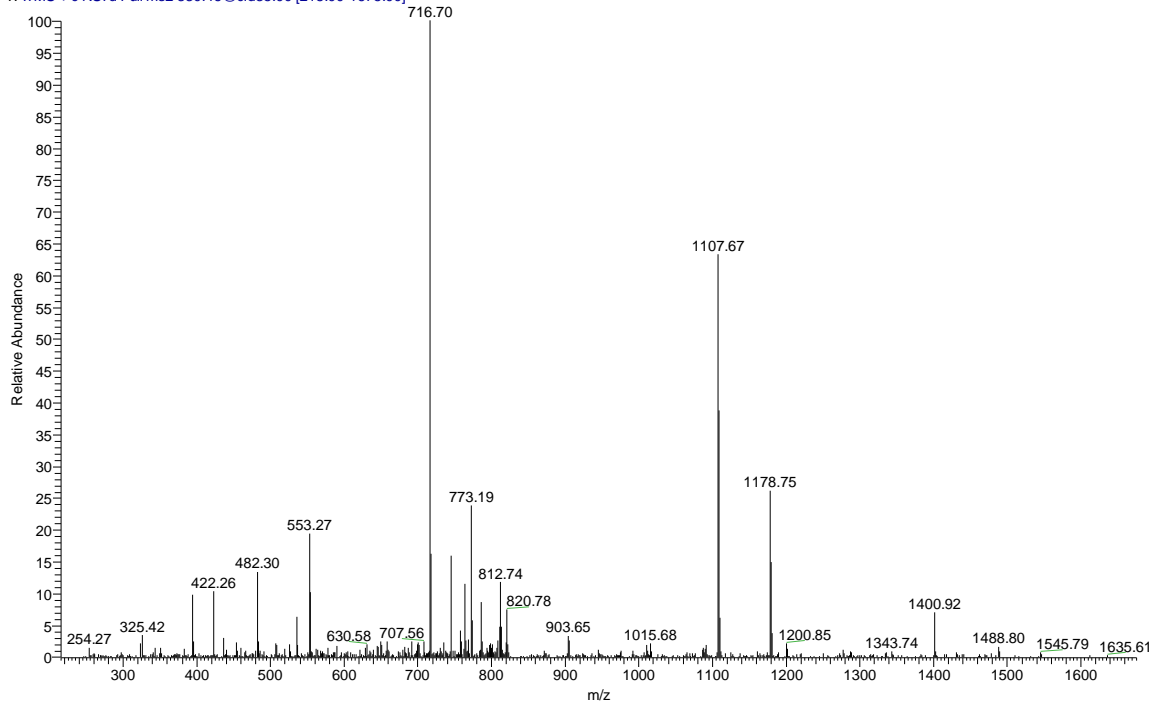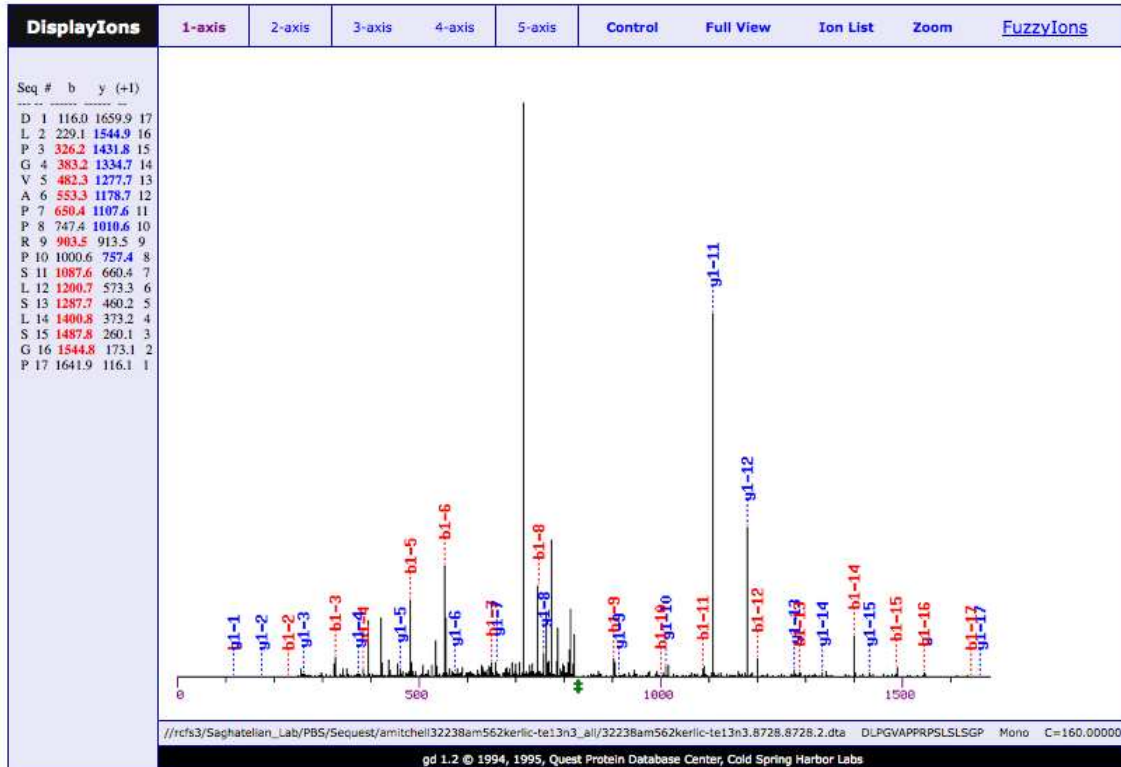

# AAASGQPRPEM\*QCPAEQTEIK Sf: .81

C:\Users\... \32375562k10kda2-e20ft  
 IF141005cm5um PF3617524cm3um ERLIC 100%

12/16/2010 9:00:45 PM

32375562K10KDA2-E21FT

32375562k10kda2-e20ft #7228 RT: 72.92 AV: 1 NL: 1.23E4  
 T: ITMS + c NSI d Full ms2 772.70@cid35.00 [200.00-2000.00]

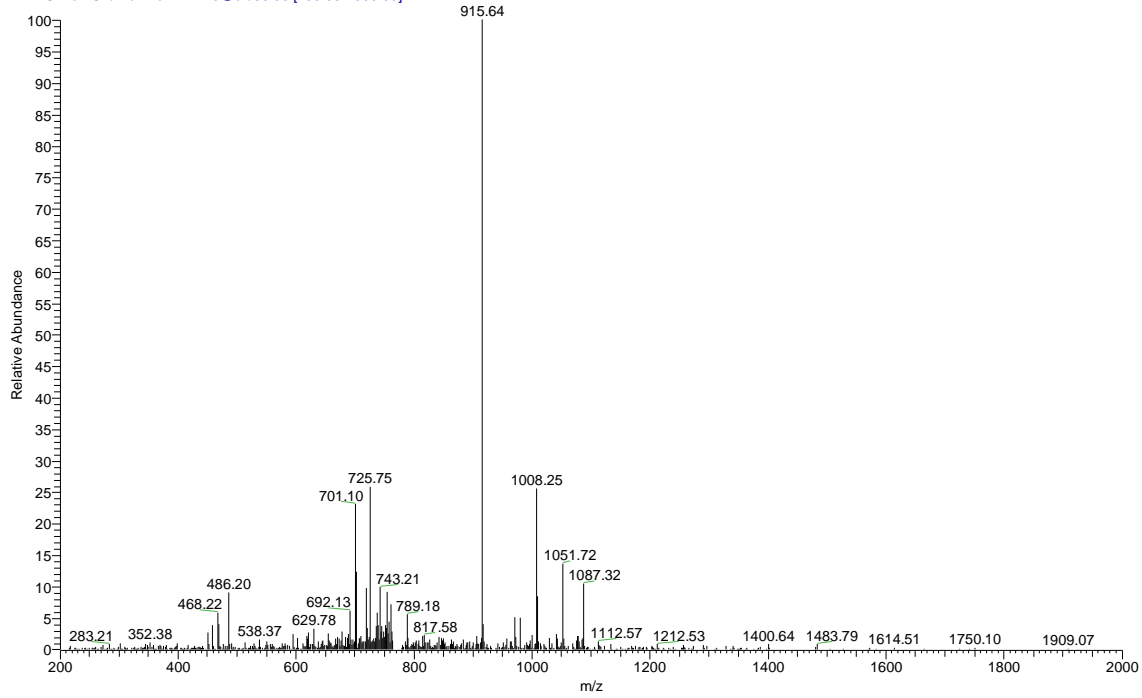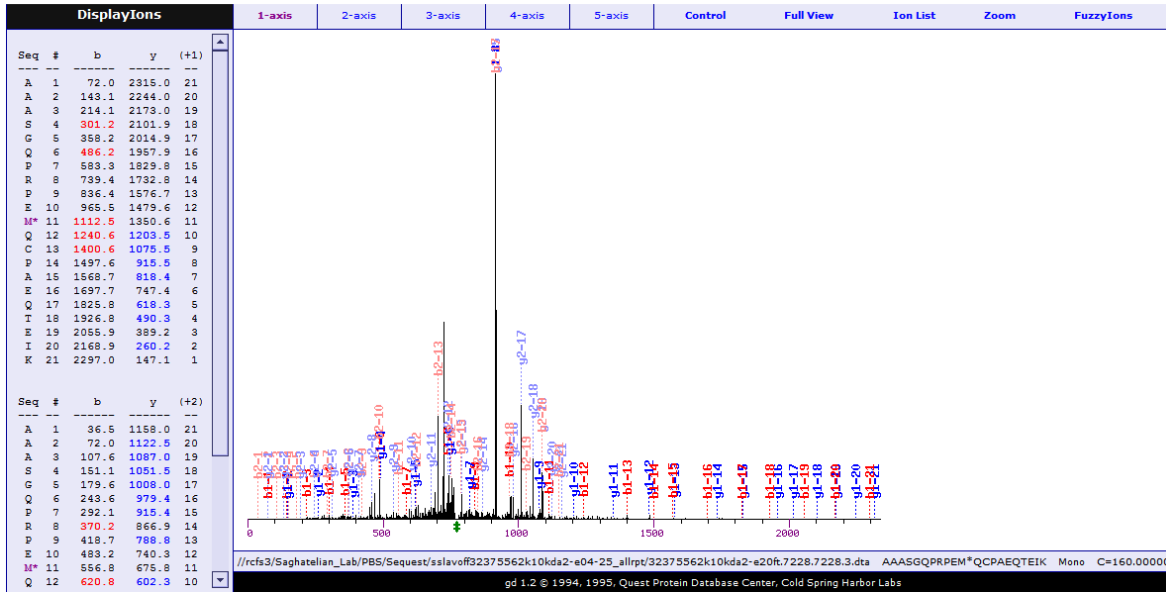

# AQHGVSNTASPGLPAGAPR Sf: .96



32375562k10kda2-e15ft #7230 RT: 70.73 AV: 1 NL: 1.99E3  
 T: ITMS + c NSI d Full ms2 962.99@cid35.00 [255.00-1940.00]

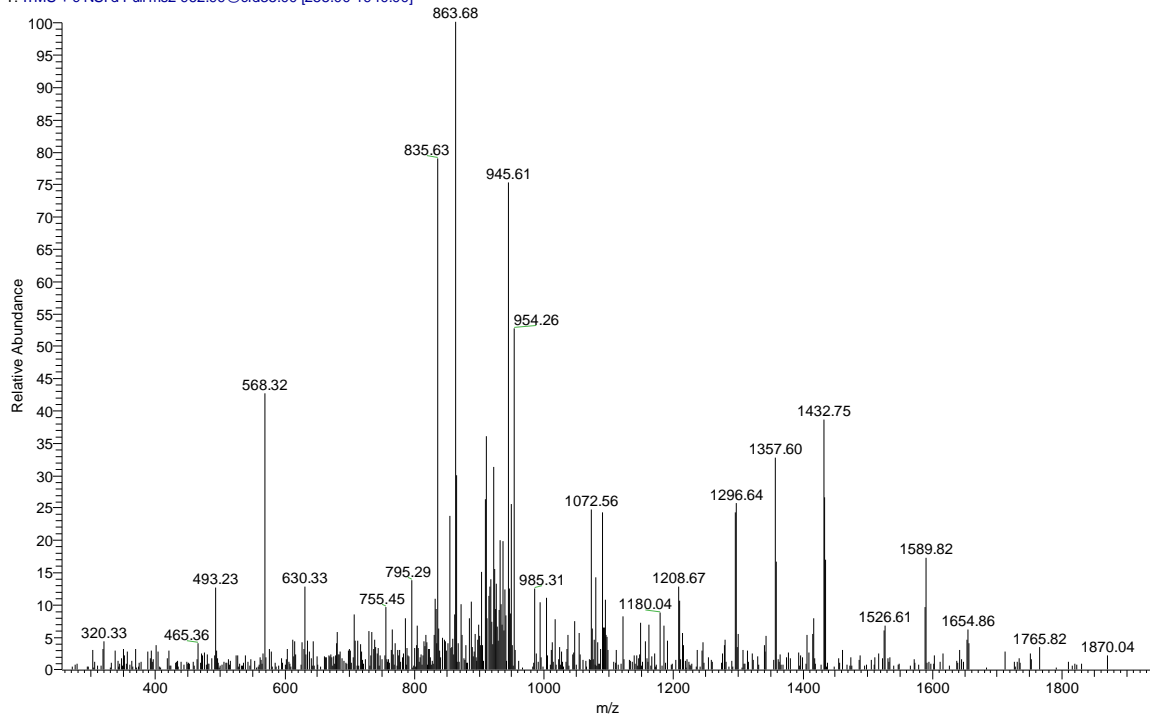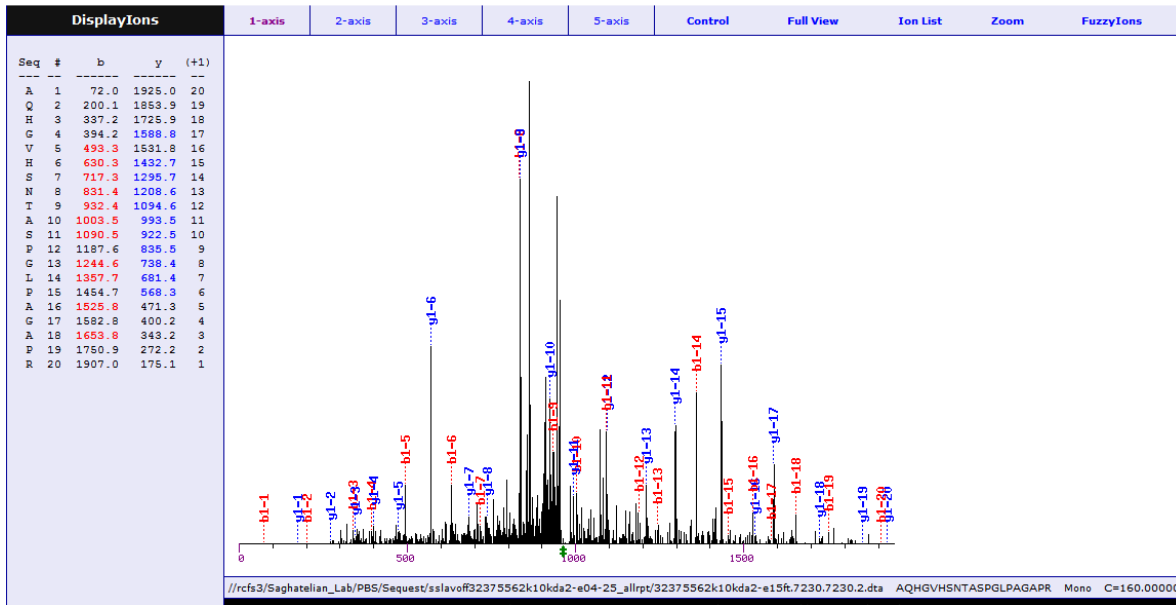

KQGGFVQVSANAL Sf: .75

32375562k10kda2-e07ft#11764 RT: 116.83 AV: 1 NL: 1.66E4  
 T: ITMS + c NSI d Full ms2 660.86@cid35.00 [170.00-1335.00]

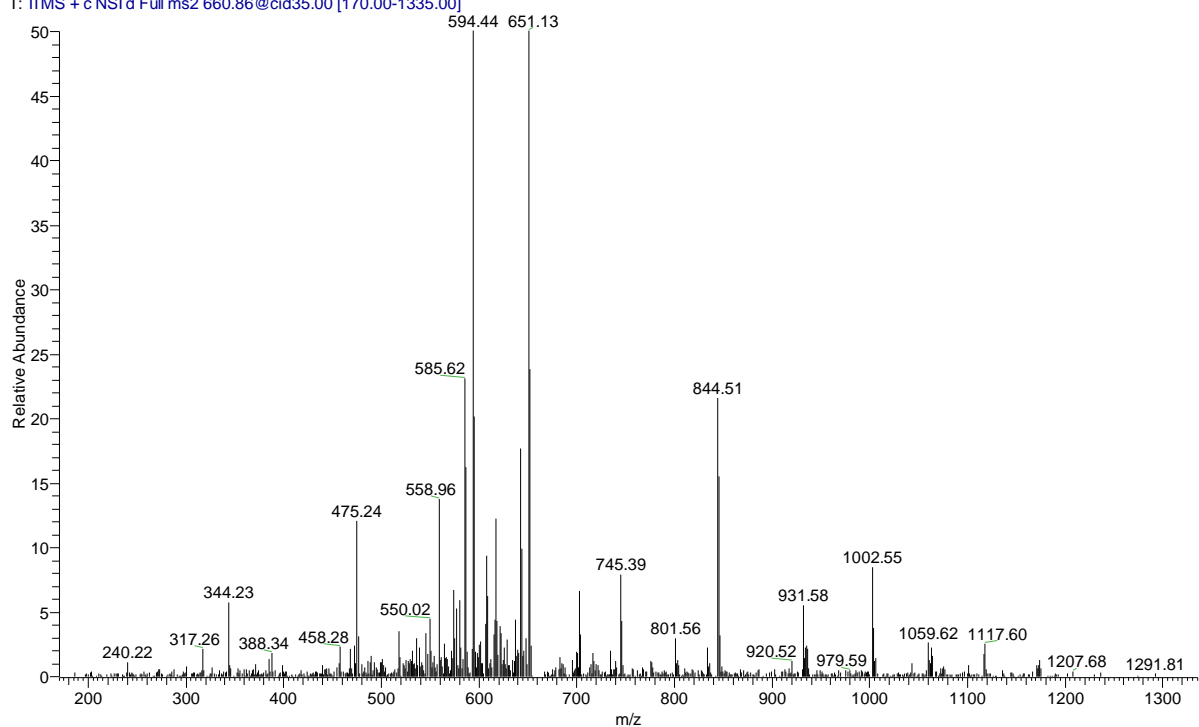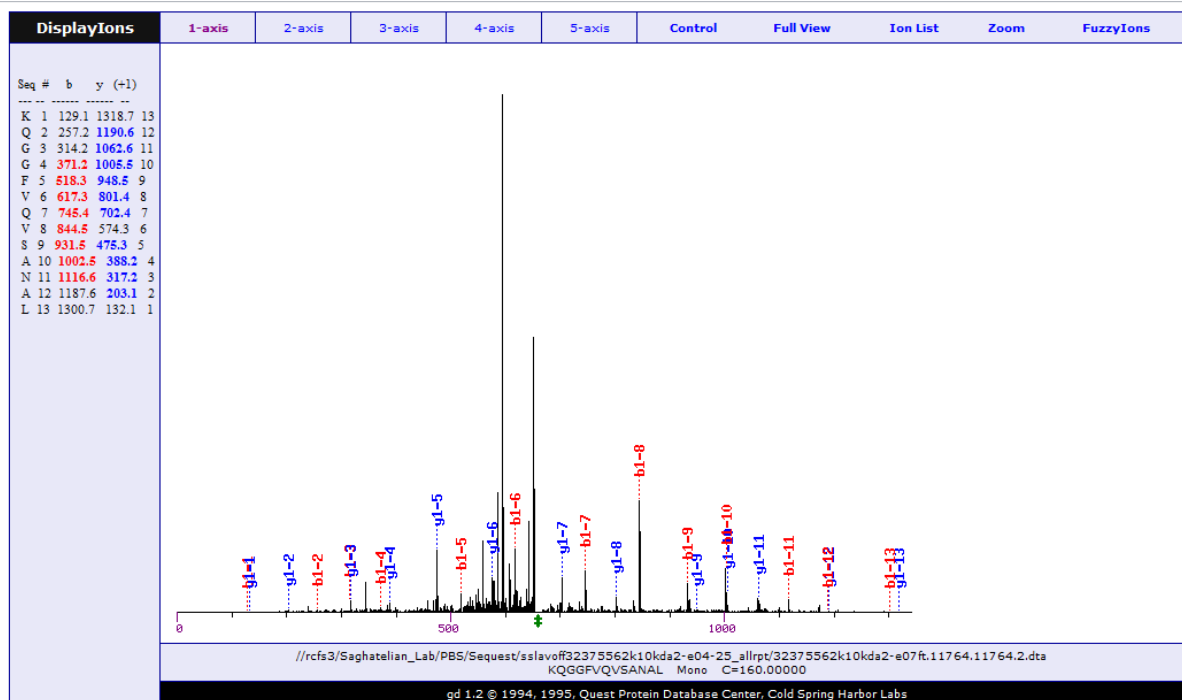

LNINQSIAVSTATQR Sf: .96

32375562k10kda2-e07ft #10693 RT: 108.95 AV: 1 NL: 2.33E3  
 T: ITMS + c NSI d Full ms2 808.44@cid35.00 [210.00-1630.00]

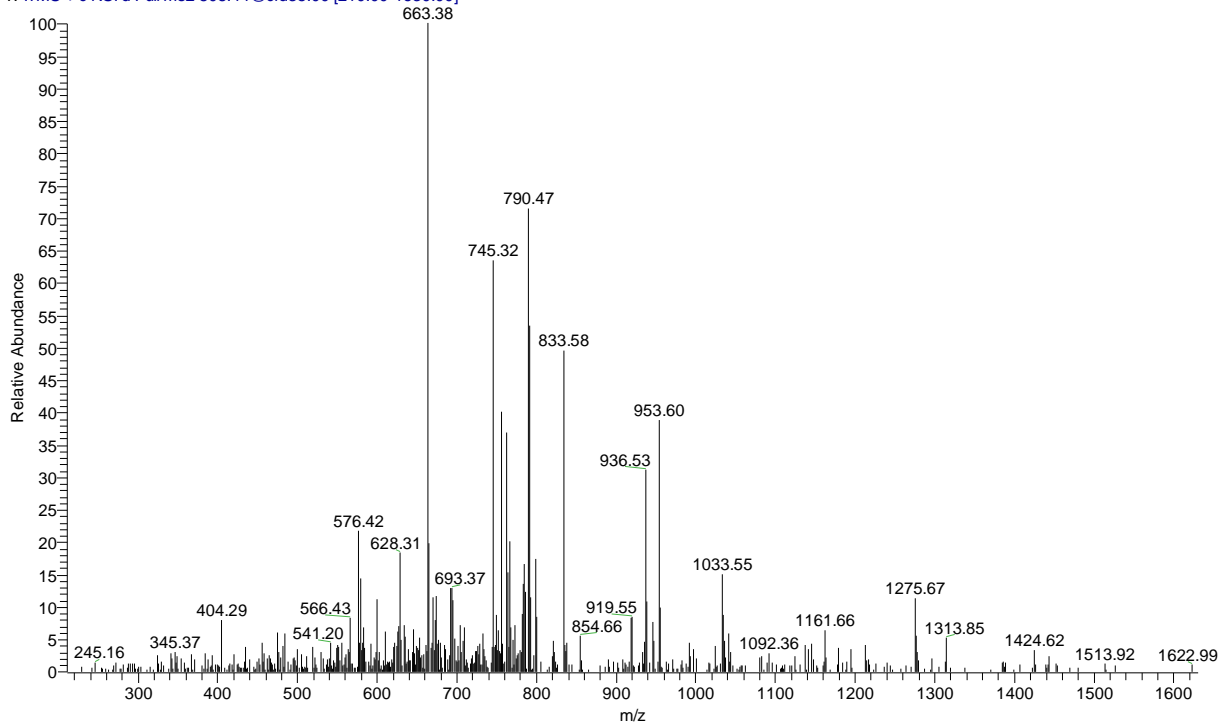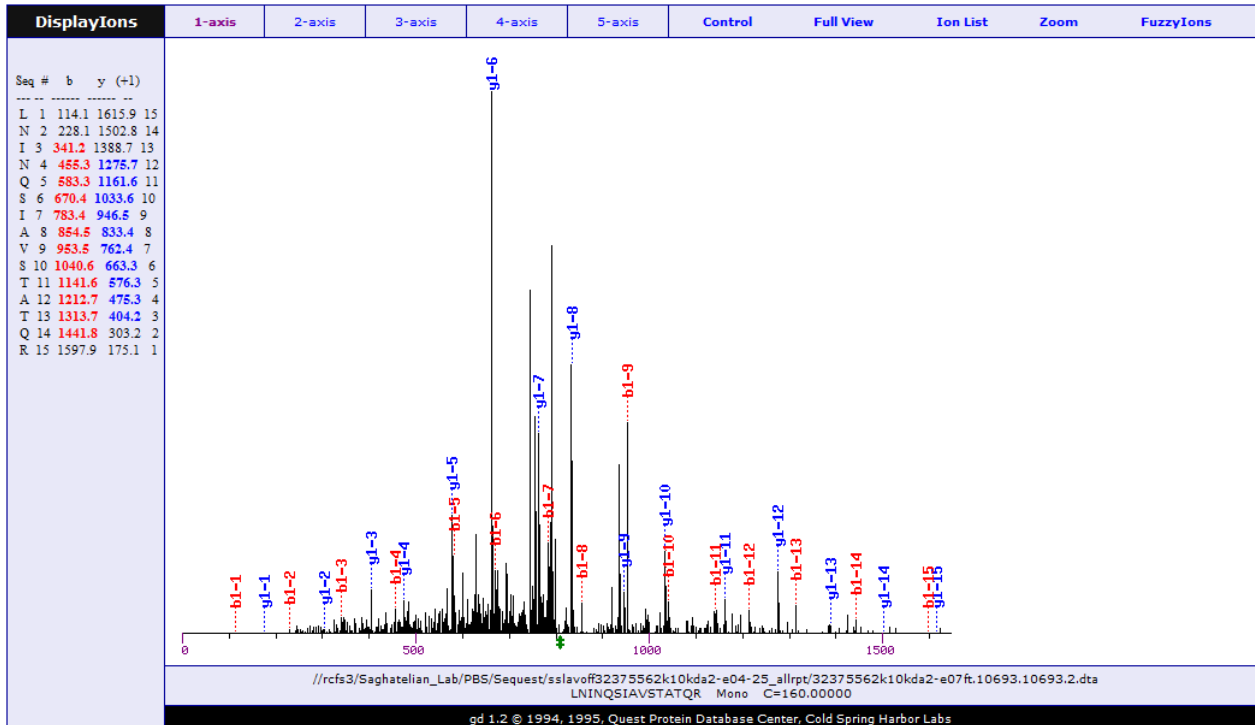

LPGQATTQQTDFDQR Sf: .88

32375562k10kda2-e15ft #9915 RT: 88.09 AV: 1 NL: 5.47E3  
 T: ITMS + c NSI.d Full ms2 795.90@cid35.00 [205.00-1605.00]

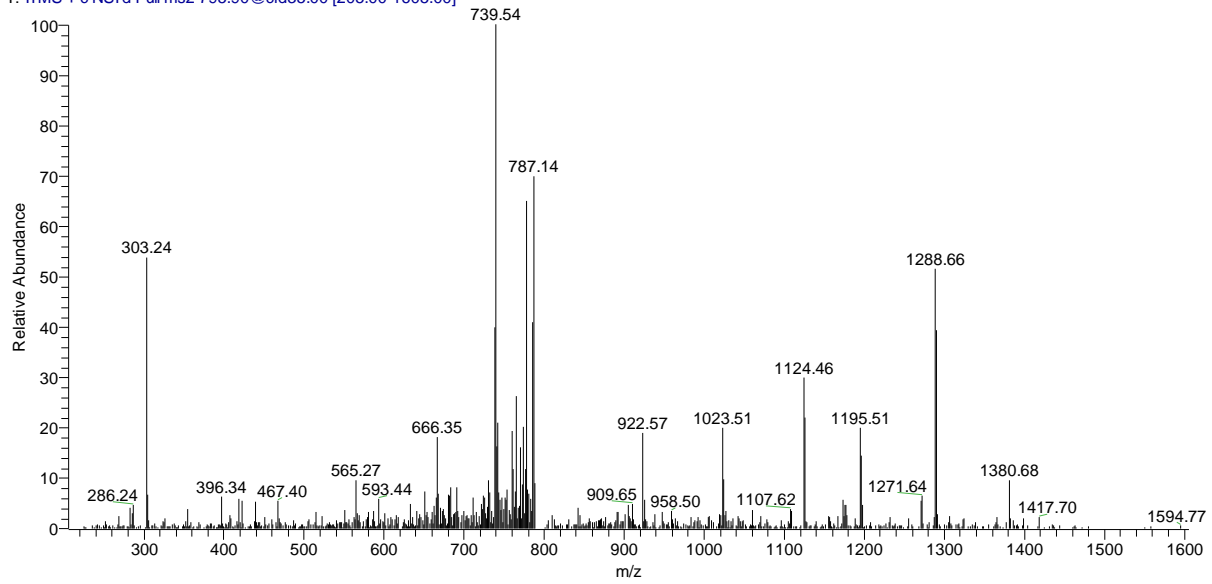

| DisplayIons         | 1-axis | 2-axis | 3-axis | 4-axis | 5-axis | Control | Full View | Ion List | Zoom | FuzzyIons |
|---------------------|--------|--------|--------|--------|--------|---------|-----------|----------|------|-----------|
| Seq # b y (+1)      |        |        |        |        |        |         |           |          |      |           |
| L 1 114.1 1590.8 14 |        |        |        |        |        |         |           |          |      |           |
| P 2 211.1 1477.7 13 |        |        |        |        |        |         |           |          |      |           |
| G 3 268.2 1380.7 12 |        |        |        |        |        |         |           |          |      |           |
| Q 4 396.2 1323.6 11 |        |        |        |        |        |         |           |          |      |           |
| A 5 467.3 1195.6 10 |        |        |        |        |        |         |           |          |      |           |
| T 6 568.3 1124.5 9  |        |        |        |        |        |         |           |          |      |           |
| T 7 669.4 1023.5 8  |        |        |        |        |        |         |           |          |      |           |
| Q 8 797.4 922.4 7   |        |        |        |        |        |         |           |          |      |           |
| Q 9 925.5 794.4 6   |        |        |        |        |        |         |           |          |      |           |
| T 10 1026.5 666.3 5 |        |        |        |        |        |         |           |          |      |           |
| F 11 1173.6 565.3 4 |        |        |        |        |        |         |           |          |      |           |
| D 12 1288.6 418.2 3 |        |        |        |        |        |         |           |          |      |           |
| Q 13 1416.7 303.2 2 |        |        |        |        |        |         |           |          |      |           |
| R 14 1572.8 175.1 1 |        |        |        |        |        |         |           |          |      |           |

  

//rcfs3/Saghatelian\_Lab/PBS/Sequest/sslavoff32375562k10kda2-e04-25\_allrpt/32375562k10kda2-e15ft.9915.9915.2.dta  
 LPQATTQTTFDQR Mono C=160.00000

gd 1.2 © 1994, 1995, Quest Protein Database Center, Cold Spring Harbor Labs

# LVSAVLAGE Sf: .75

32375562k10kda2-e09ft #7510 RT: 78.43 AV: 1 NL: 3.02E4  
 T: ITMS + c NSI d Full ms2 493.80@cid35.00 [125.00-1000.00]

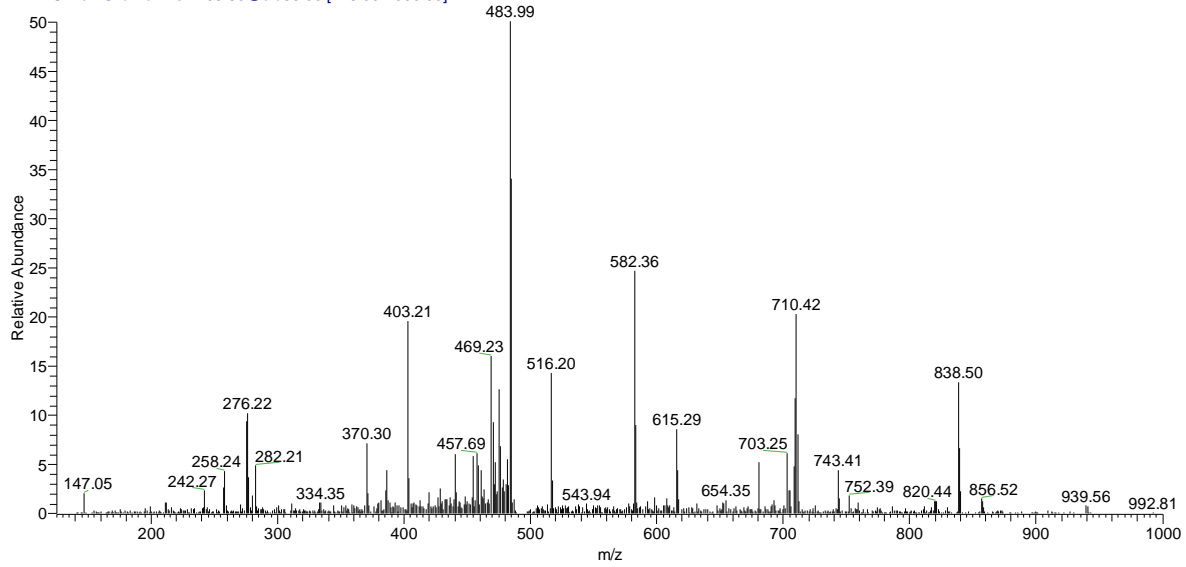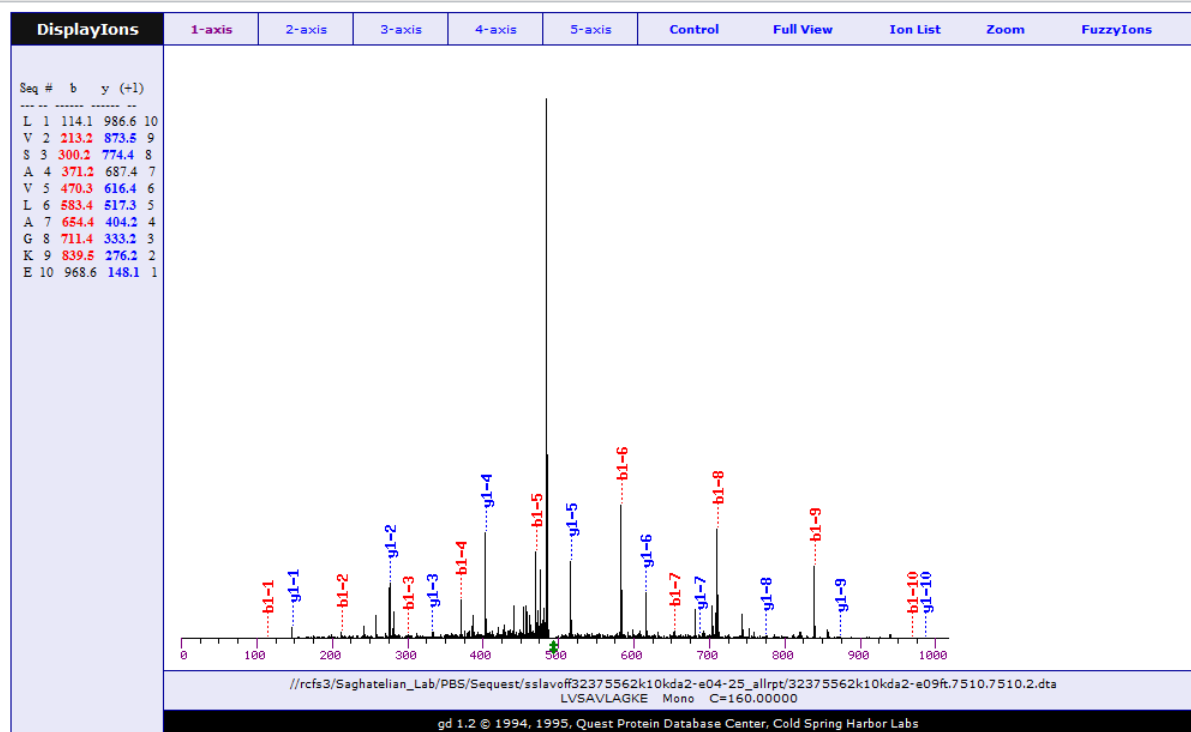

# PAVAAATLHLPAPEGPH Sf: .88

32375562k10kda2-e11ft#13798 RT: 113.90 AV: 1 NL: 7.18E4  
 T: ITMS + c NSI d Full ms2 573.98@cid35.00 [145.00-1735.00]

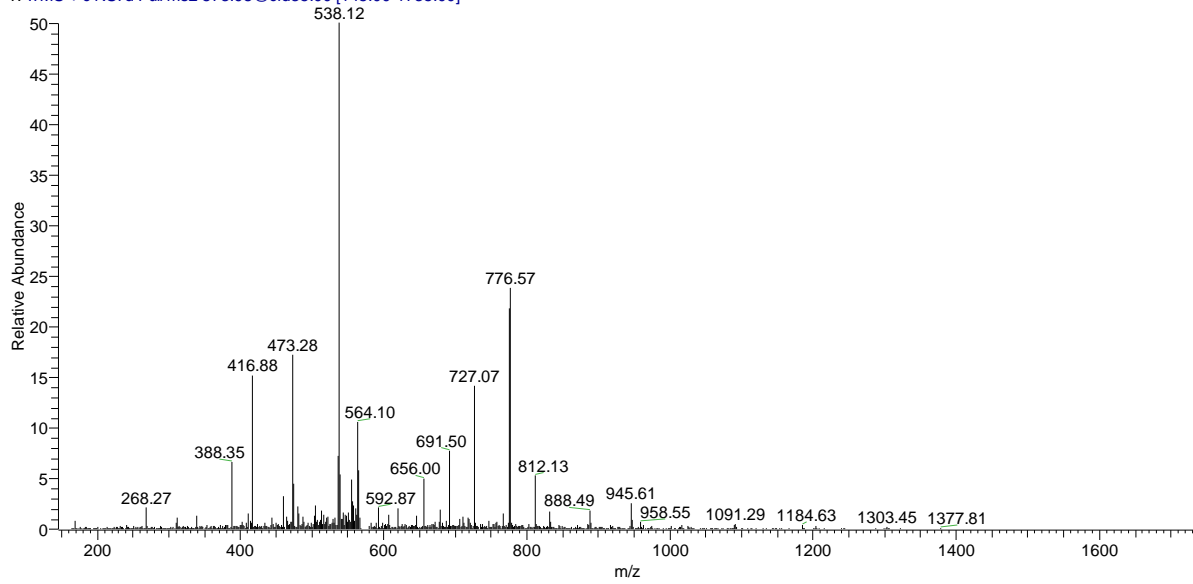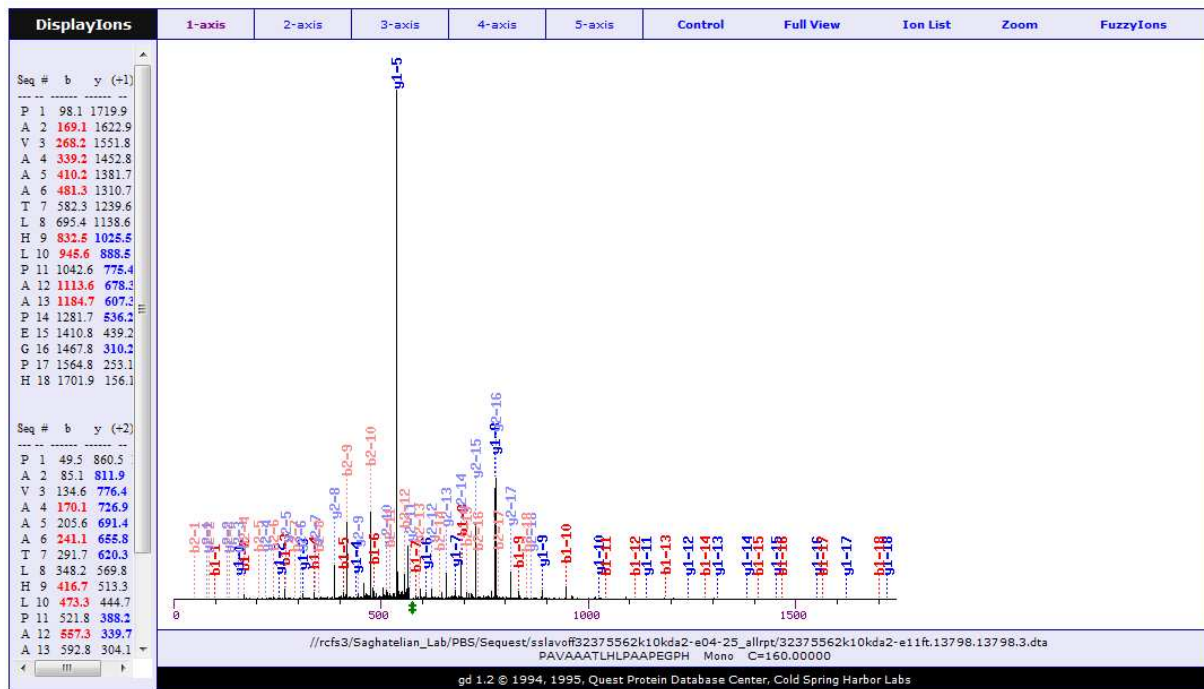

QELIGASLHTAR Sf: .75

32375562k10kda2-e18ft #10556 RT: 97.30 AV: 1 NL: 3.59E3  
T: ITMS + c NSI d Full ms2 648.36@cid35.00 [165.00-1310.00]

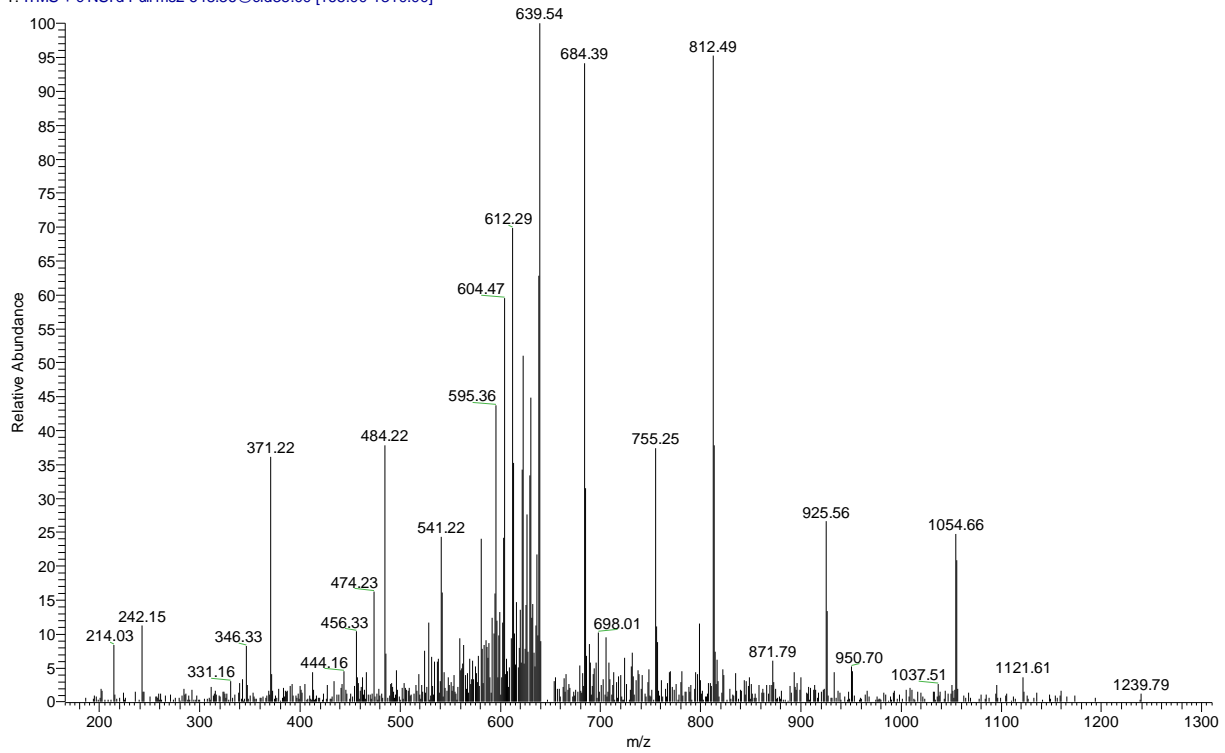

| DisplayIons    | 1-axis | 2-axis | 3-axis | 4-axis | 5-axis | Control | Full View | Ion List | Zoom | FuzzyIons |
|----------------|--------|--------|--------|--------|--------|---------|-----------|----------|------|-----------|
| Seq # b y (+1) |        |        |        |        |        |         |           |          |      |           |
| Q 1            | 129.1  | 1295.7 | 12     |        |        |         |           |          |      |           |
| E 2            | 258.1  | 1167.6 | 11     |        |        |         |           |          |      |           |
| L 3            | 371.2  | 1038.6 | 10     |        |        |         |           |          |      |           |
| I 4            | 484.3  | 925.5  | 9      |        |        |         |           |          |      |           |
| G 5            | 541.3  | 812.4  | 8      |        |        |         |           |          |      |           |
| A 6            | 612.3  | 755.4  | 7      |        |        |         |           |          |      |           |
| S 7            | 699.4  | 684.4  | 6      |        |        |         |           |          |      |           |
| L 8            | 812.5  | 597.3  | 5      |        |        |         |           |          |      |           |
| H 9            | 949.5  | 484.3  | 4      |        |        |         |           |          |      |           |
| T 10           | 1050.6 | 347.2  | 3      |        |        |         |           |          |      |           |
| A 11           | 1121.6 | 246.2  | 2      |        |        |         |           |          |      |           |
| R 12           | 1277.7 | 175.1  | 1      |        |        |         |           |          |      |           |

///rcfs3/Saghatelian\_Lab/PBS/Sequest/sslavoff32375562k10kda2-e04-25\_allrpt/32375562k10kda2-e18ft.10556.10556.2.dta QELIGASLHTAR Mono C=160.00000

gd 1.2 © 1994, 1995, Quest Protein Database Center, Cold Spring Harbor Labs

# THLGTEGQCCLPGAGGPAR Sf: .98

C:\Users\... \32375562k10kda2-e18ft  
 IF141005cm5um PF3617524cm3um ERLIC 100%

12/16/2010 11:45:26 AM

32375562K10KDA2-E18FT

32375562k10kda2-e18ft #9051 RT: 84.86 AV: 1 NL: 3.94E3  
 T: ITMS + c NSI d Full ms2 947.95@cid35.00 [250.00-1910.00]

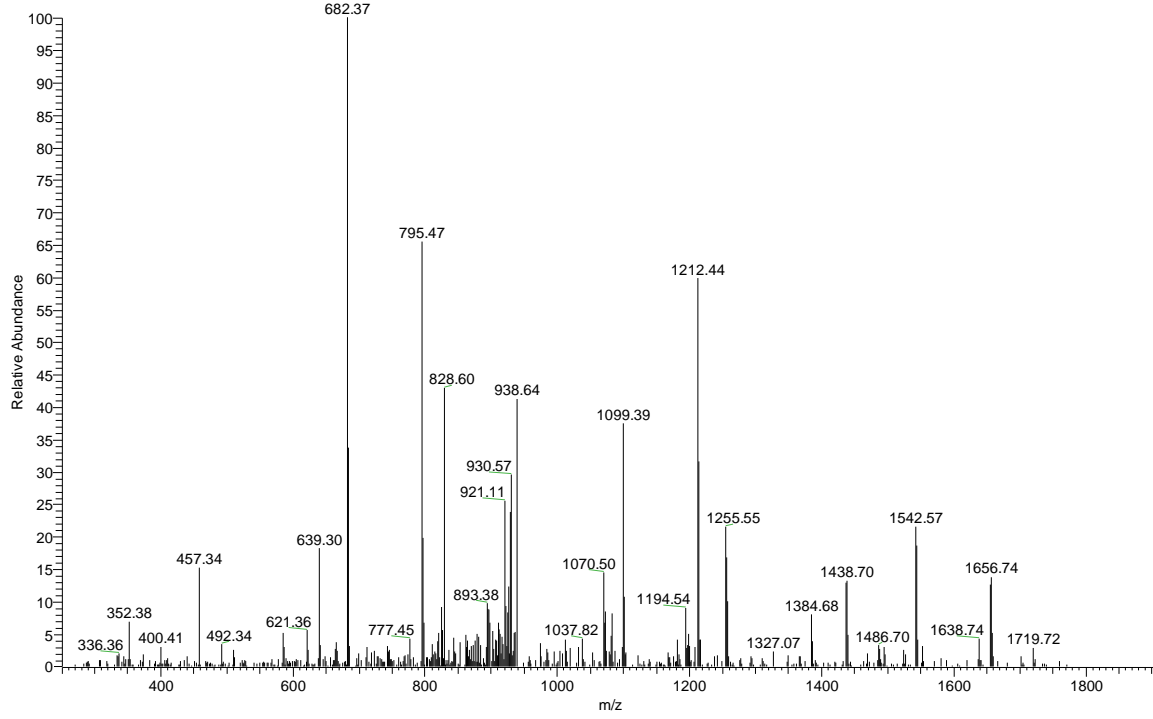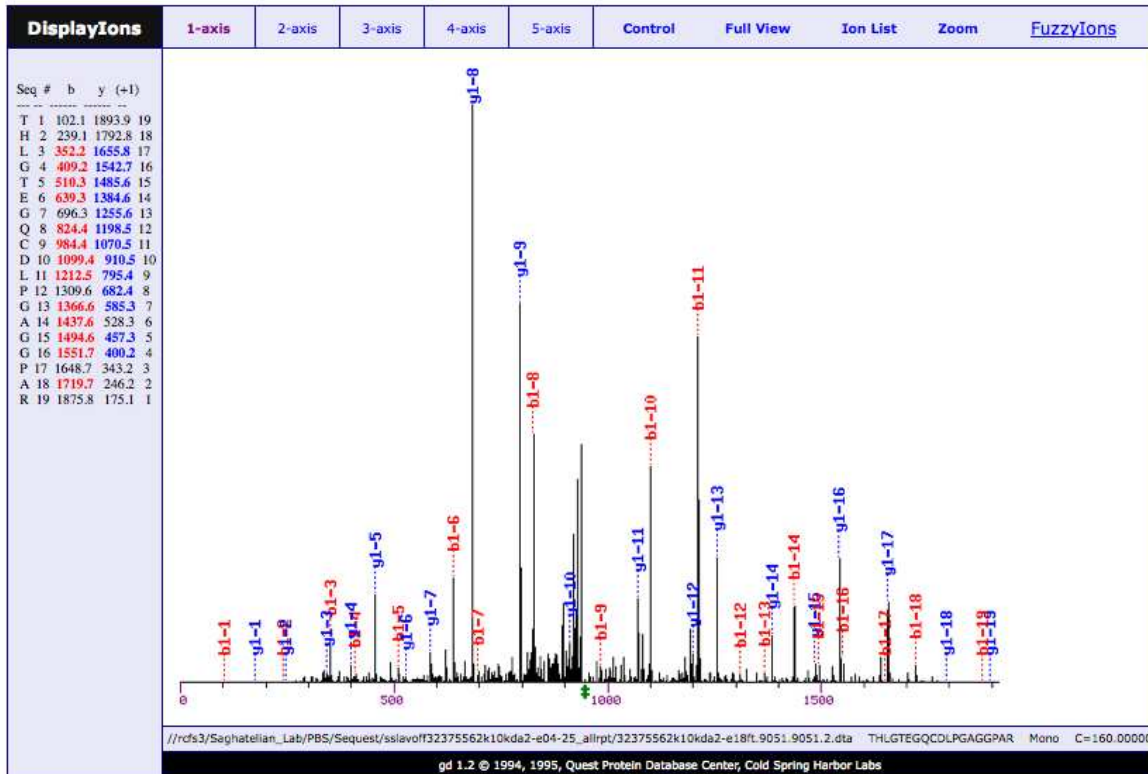



# TSDAPRPSATPPGADPLNSAGPGAR Sf: .81

32375562k10kda2-e18ft#9869 RT: 91.42 AV: 1 NL: 5.12E3  
 T: ITMS + c NSI d Full ms2 787.39@cid35.00 [205.00-2000.00]

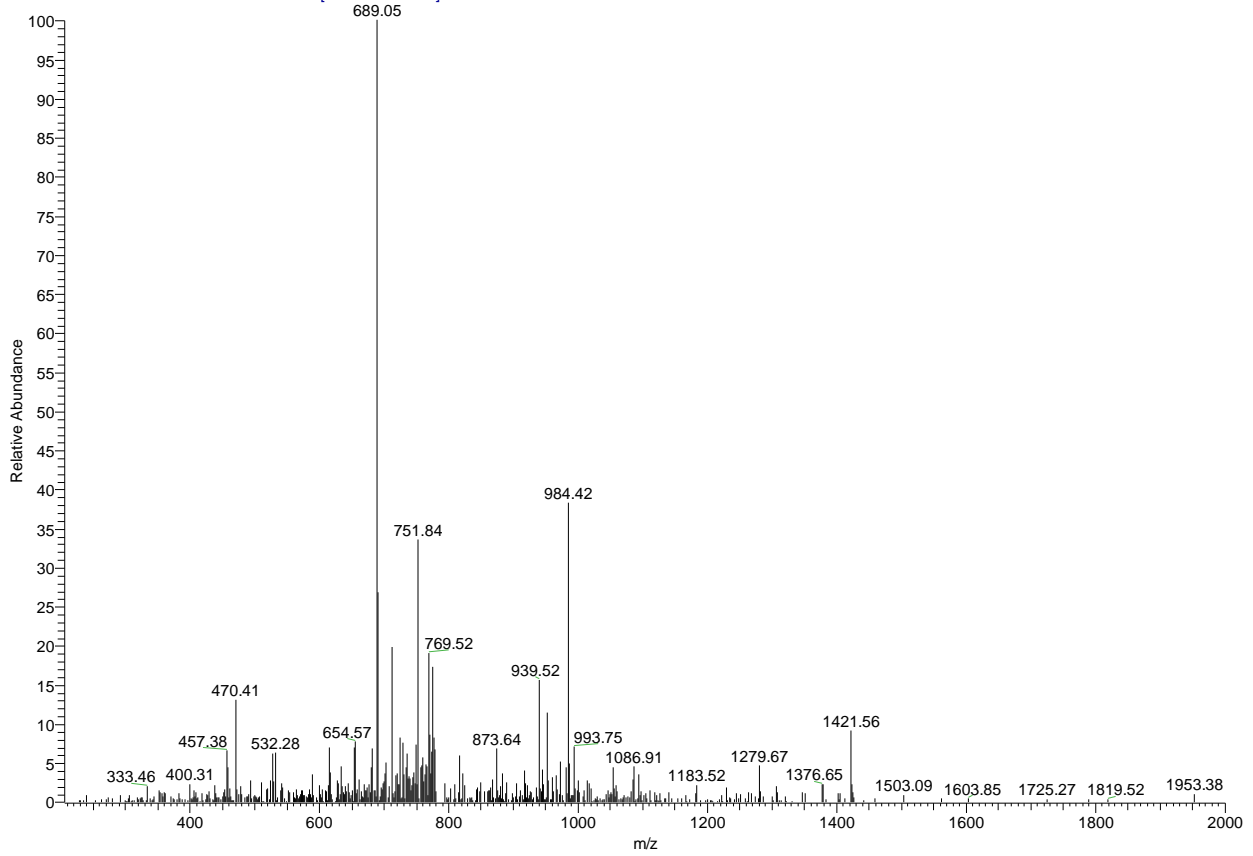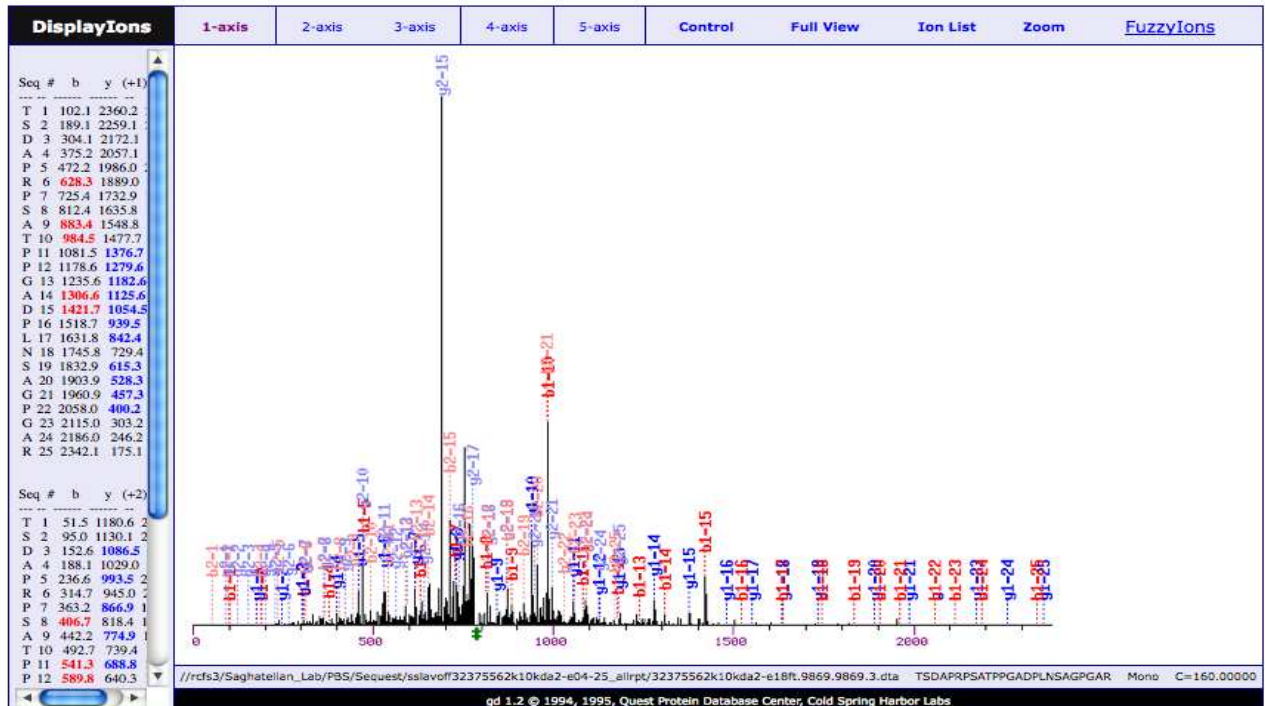

# VTSWDGQNPPR Sf: .76

C:\Users\...32375562k10kda2-e15ft  
IF141005cm5um PF3617524cm3um ERLIC 100%

12/15/2010 9:52:28 PM

32375562K10KDA2-E15FT

32375562k10kda2-e15ft #8814 RT: 80.79 AV: 1 NL: 5.34E3  
T: ITMS + c NSI d Full ms2 628.81 @cid35.00 [160.00-1270.00]

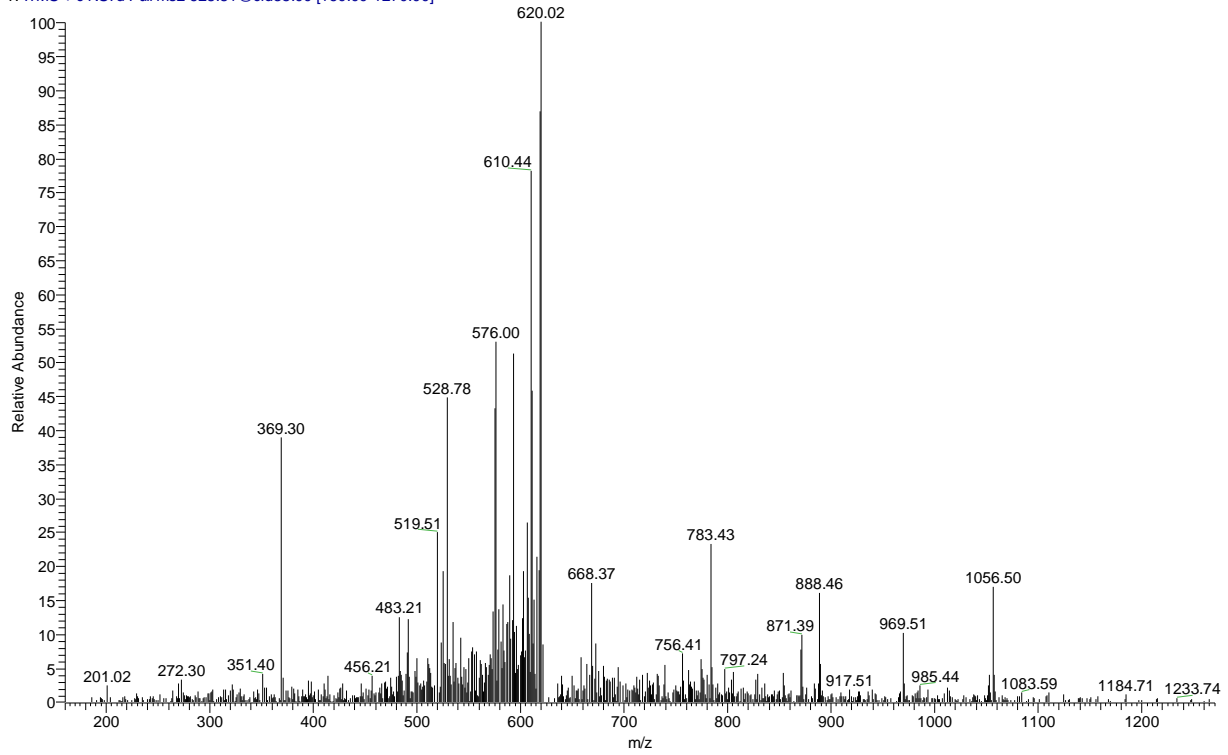

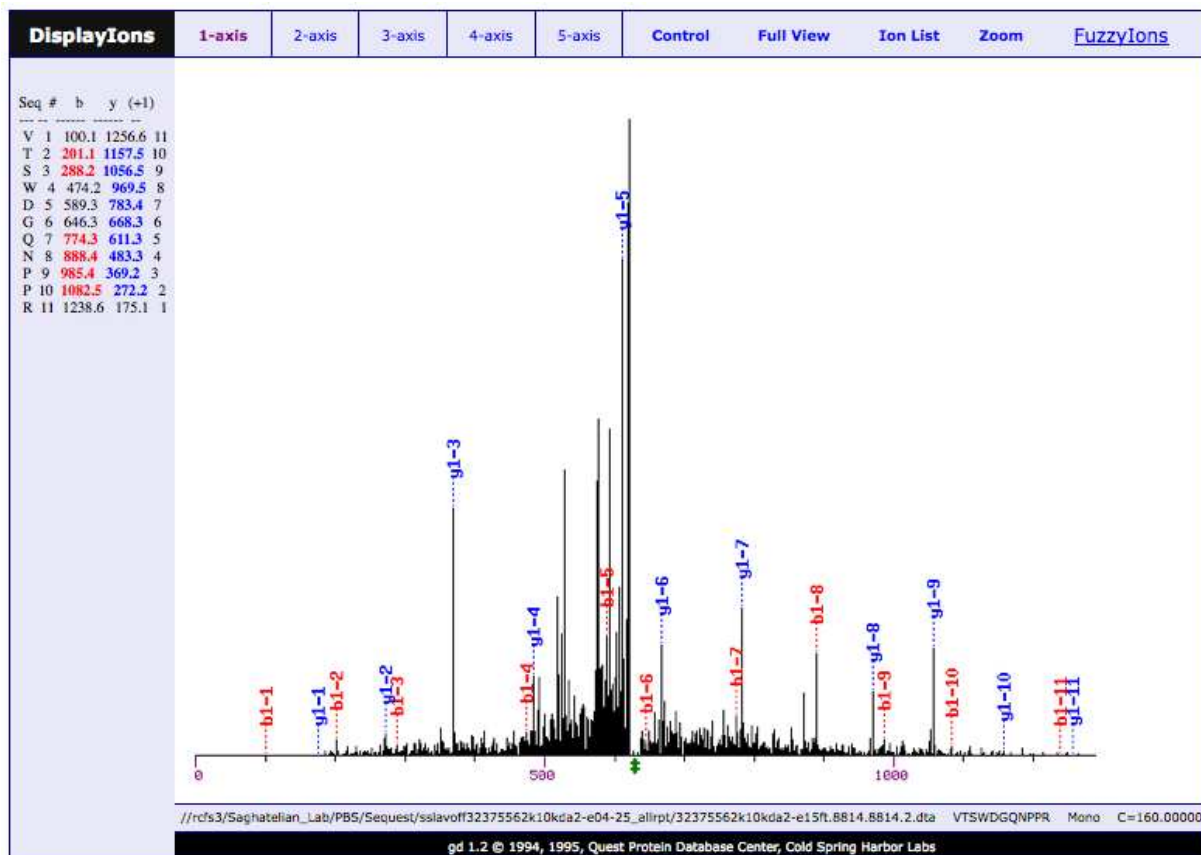

AAPGPTAAAAAQASAAAR Sf: .82

32375562k10kda2-e08ft #8326 RT: 87.48 AV: 1 NL: 3.38E4  
 T: ITMS + c NSI d Full ms2 762.90@cid35.00 [200.00-1540.00]

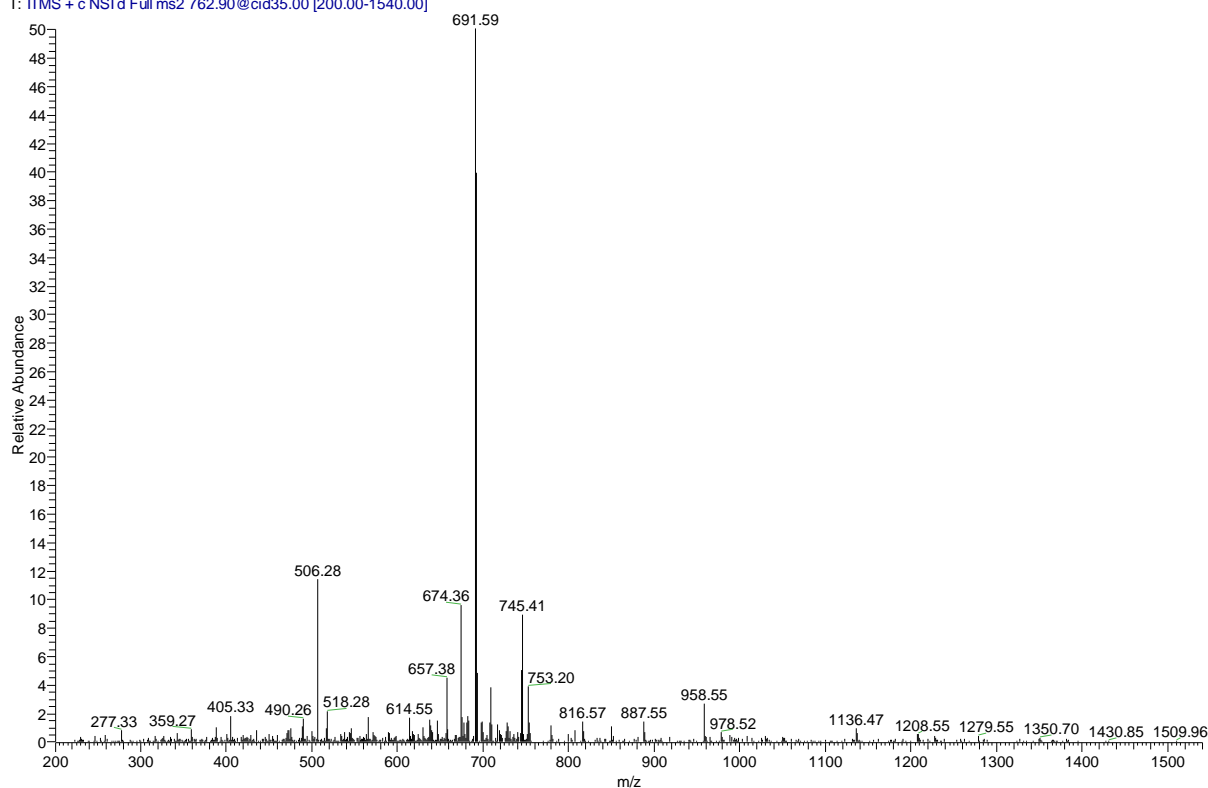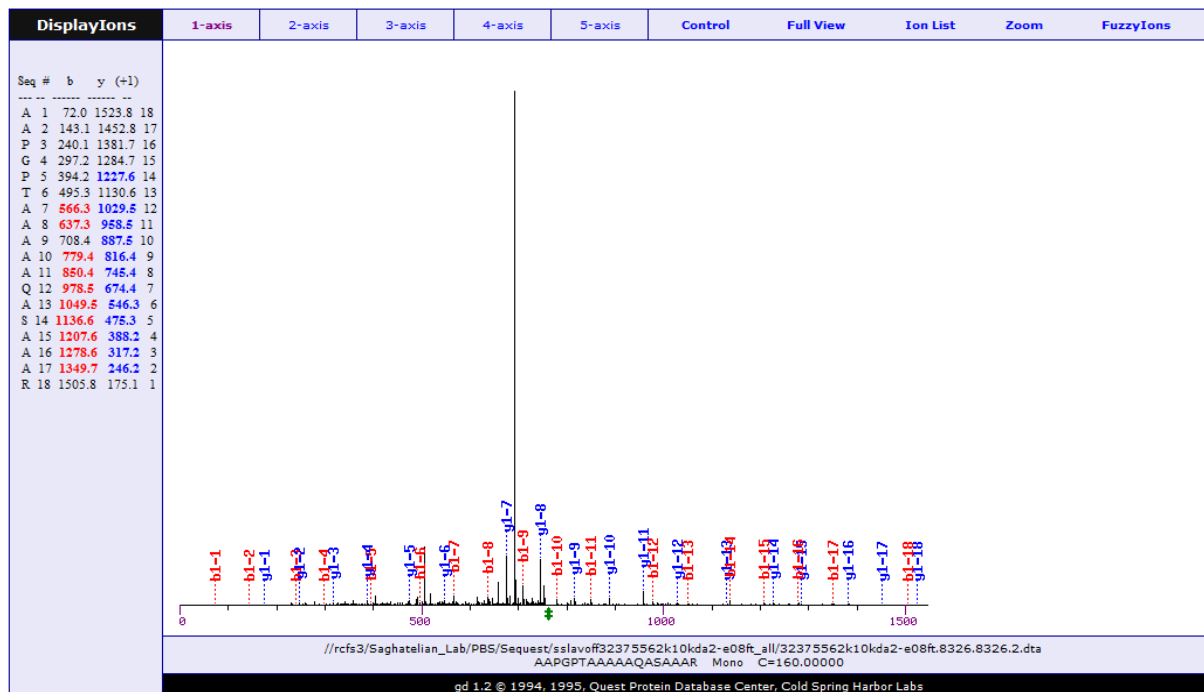

RLIIPPEK Sf: .82

32375562k10kda2-e08ft #7859 RT: 84.32 AV: 1 NL: 1.79E4  
 T: ITMS + c NSI d Full ms2 483.81@cid35.00 [120.00-980.00]

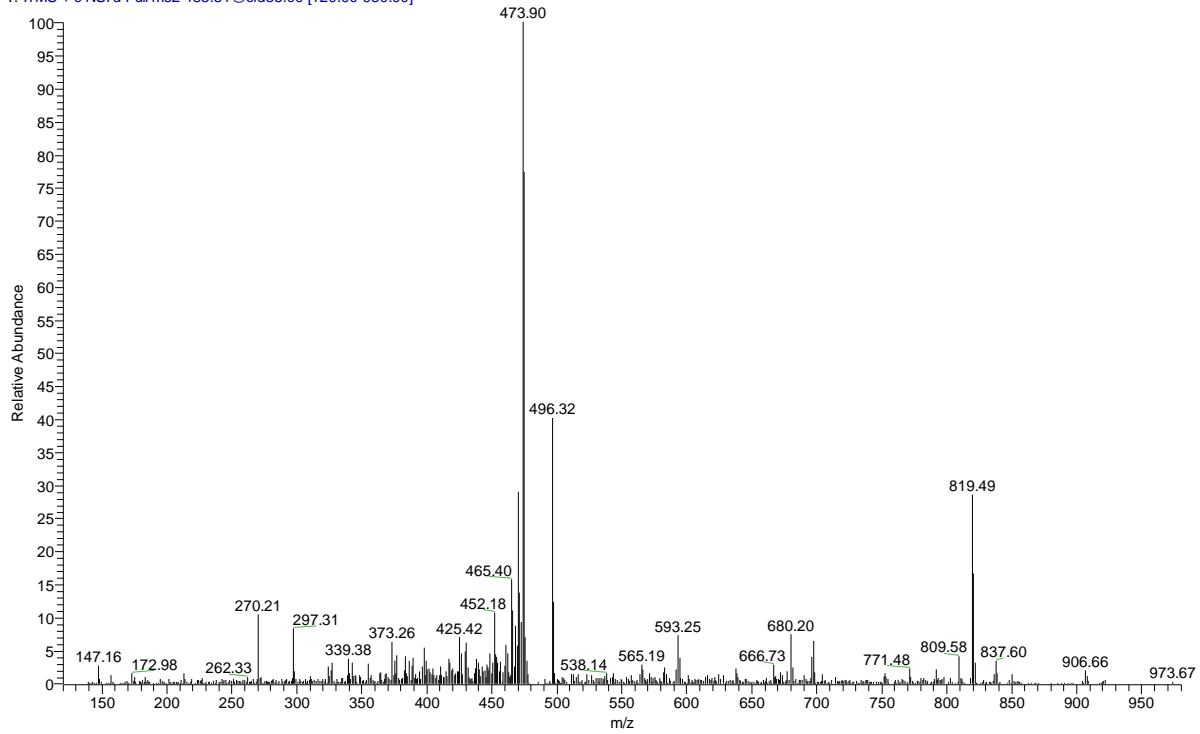

| DisplayIons                                                                                                                                                                                           | 1-axis | 2-axis | 3-axis | 4-axis | 5-axis | Control | Full View | Ion List | Zoom | FuzzyIons |
|-------------------------------------------------------------------------------------------------------------------------------------------------------------------------------------------------------|--------|--------|--------|--------|--------|---------|-----------|----------|------|-----------|
| <pre> Seq #  b  y (+1) ----- R 1  157.1 965.6 8 L 2  270.2 809.5 7 I 3  383.3 696.4 6 I 4  496.4 583.3 5 P 5  593.4 470.3 4 P 6  690.5 373.2 3 E 7  819.5 276.2 2 K 8  947.6 147.1 1           </pre> |        |        |        |        |        |         |           |          |      |           |
| <p>//rcfs3/Saghatelian_Lab/PBS/Sequest/sslavovoff32375562k10kda2-e08ft_all/32375562k10kda2-e08ft.7859.7859.2.dta<br/>           RLLIPPEK Mono C=160.00000</p>                                         |        |        |        |        |        |         |           |          |      |           |
| <p>gd 1.2 © 1994, 1995, Quest Protein Database Center, Cold Spring Harbor Labs</p>                                                                                                                    |        |        |        |        |        |         |           |          |      |           |

SPTTDSYGIPQGCK Sf: .89

32375562k10kda2-e17ft #9859 RT: 89.16 AV: 1 NL: 8.86E3  
 T: ITMS + c NSI d Full ms2 756.34@cid35.00 [195.00-1525.00]

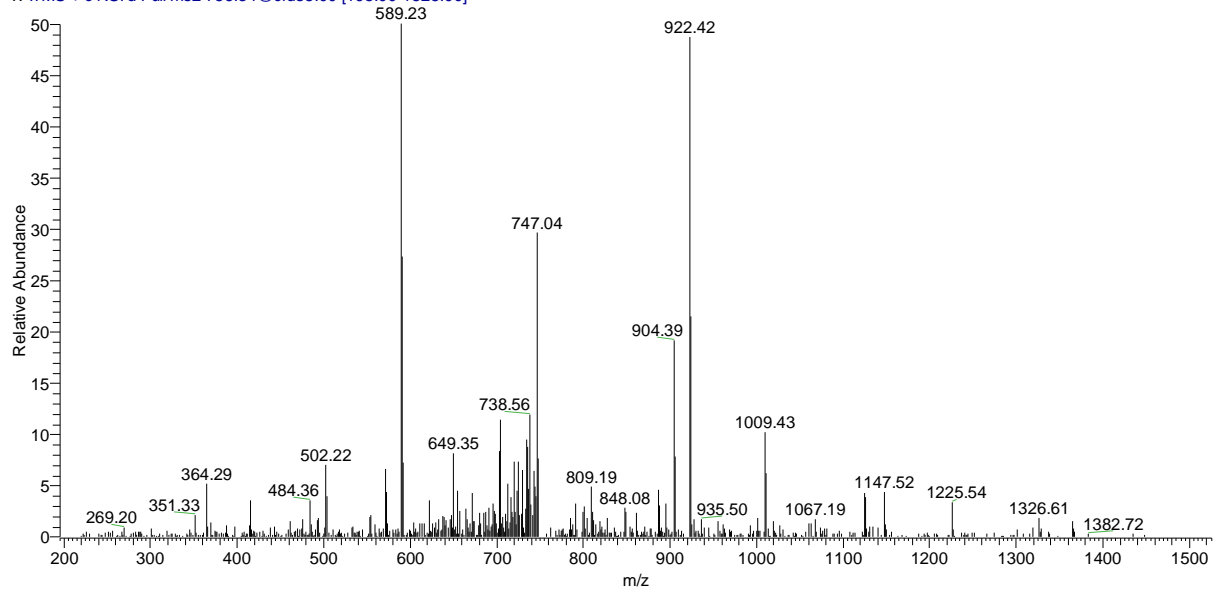

| DisplayIons                                                                                                                                                                                                                                                                                                                                   | 1-axis | 2-axis | 3-axis | 4-axis | 5-axis | Control | Full View | Ion List | Zoom | FuzzyIons |
|-----------------------------------------------------------------------------------------------------------------------------------------------------------------------------------------------------------------------------------------------------------------------------------------------------------------------------------------------|--------|--------|--------|--------|--------|---------|-----------|----------|------|-----------|
| <pre> Seq #  b  y (+1) ----- S 1  88.0 1510.7 14 P 2 185.1 1423.6 13 T 3  286.1 1326.6 12 T 4  387.2 1225.5 11 D 5  502.2 1124.5 10 S 6  589.2 1009.4 9 Y 7  752.3  922.4 8 G 8  809.3  759.4 7 I 9  922.4  702.3 6 P 10 1019.5  589.2 5 Q 11 1147.5  492.2 4 G 12 1204.5  364.1 3 C 13 1364.5  307.1 2 K 14 1492.6  147.1 1           </pre> |        |        |        |        |        |         |           |          |      |           |
| <p>///rcfs3/Saghatelian_Lab/PBS/Sequest/sslavoff32375562k10kda2-e17ft_all/32375562k10kda2-e17ft.9859.9859.2.dta<br/>           SPTTDSVGIPQGCK Mono C=160.00000</p>                                                                                                                                                                            |        |        |        |        |        |         |           |          |      |           |
| <p>gd 1.2 © 1994, 1995, Quest Protein Database Center, Cold Spring Harbor Labs</p>                                                                                                                                                                                                                                                            |        |        |        |        |        |         |           |          |      |           |

DYILSLEMFSILLWG Sf: .77

32375562k10kda2-e24ft #21298 RT: 158.82 AV: 1 NL: 2.77E3  
 T: ITMS + c NSI d Full ms2 900.46@cid35.00 [235.00-1815.00]

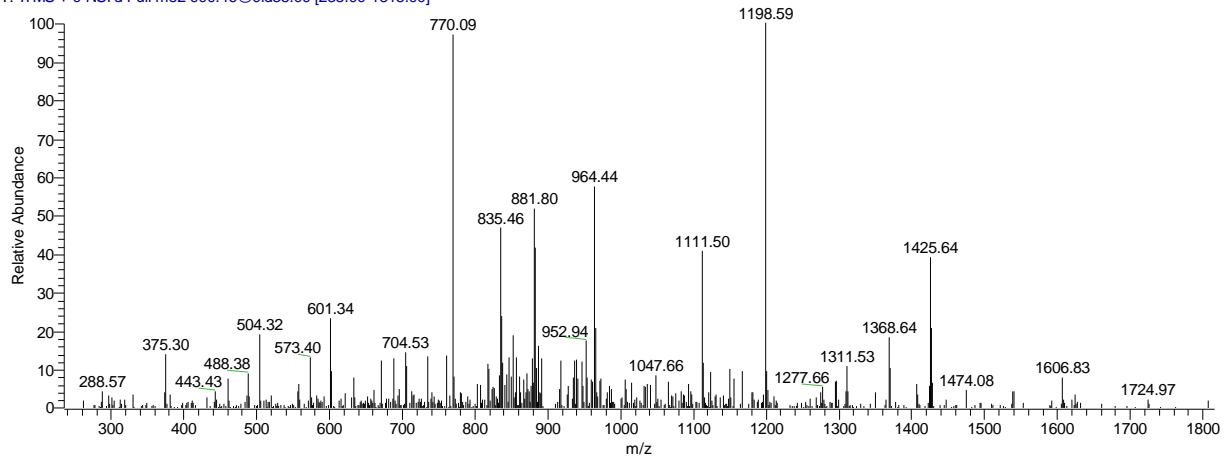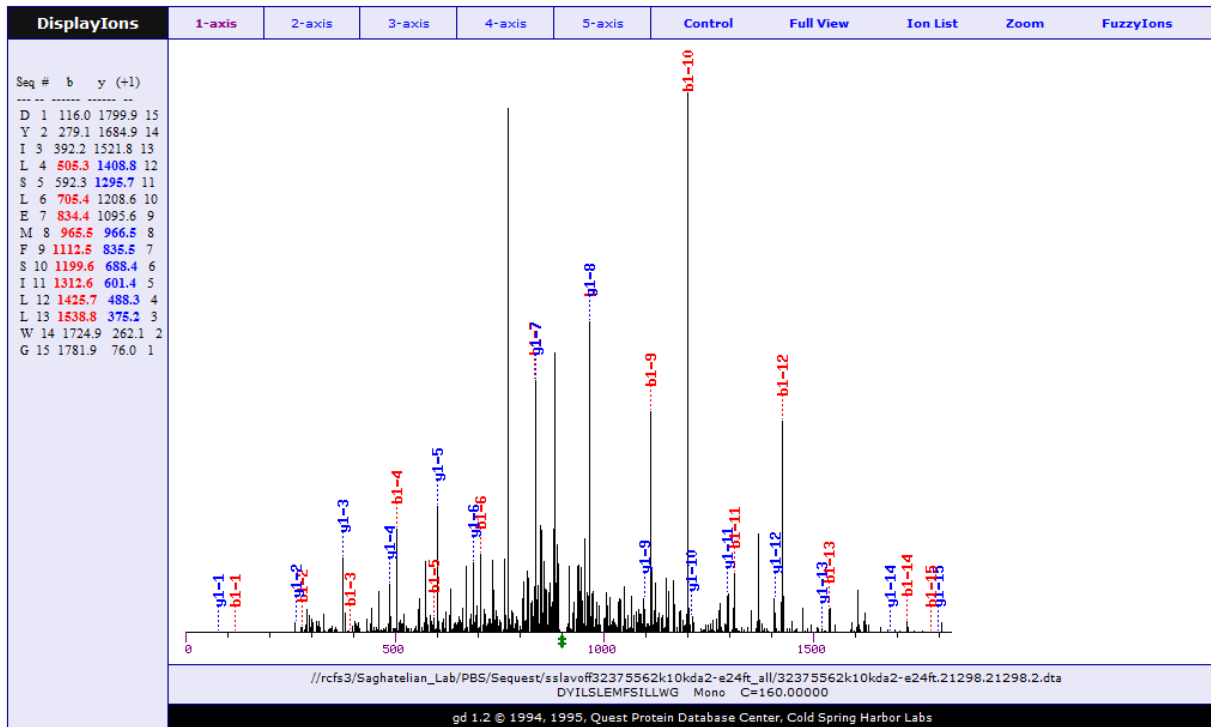

HGHSFPDPGLLLQNQGD Sf: .79

32375562k10kda2-e24ft #17199 RT: 129.29 AV: 1 NL: 1.23E4  
 T: ITMS + c NSI d Full ms2 611.97@cid35.00 [155,00-1850.00]

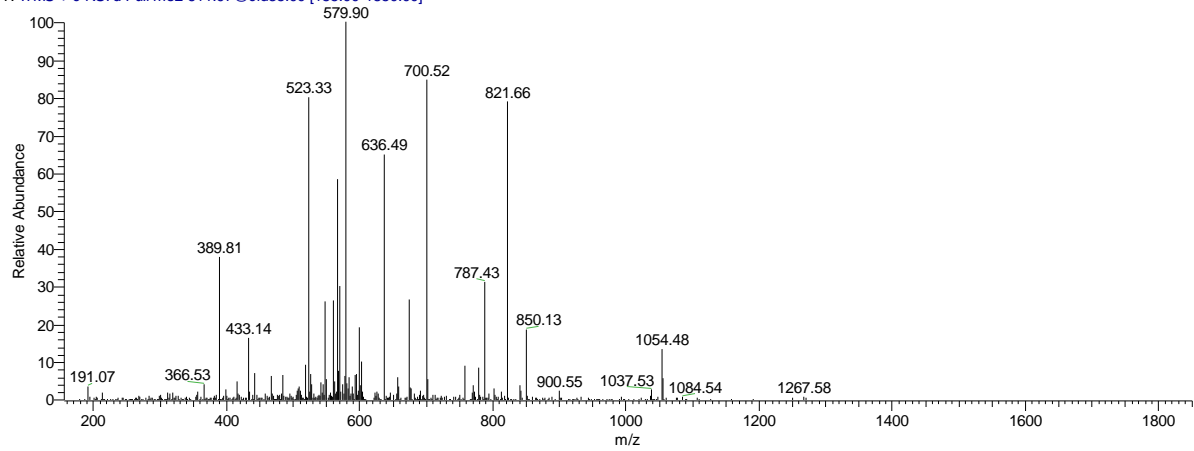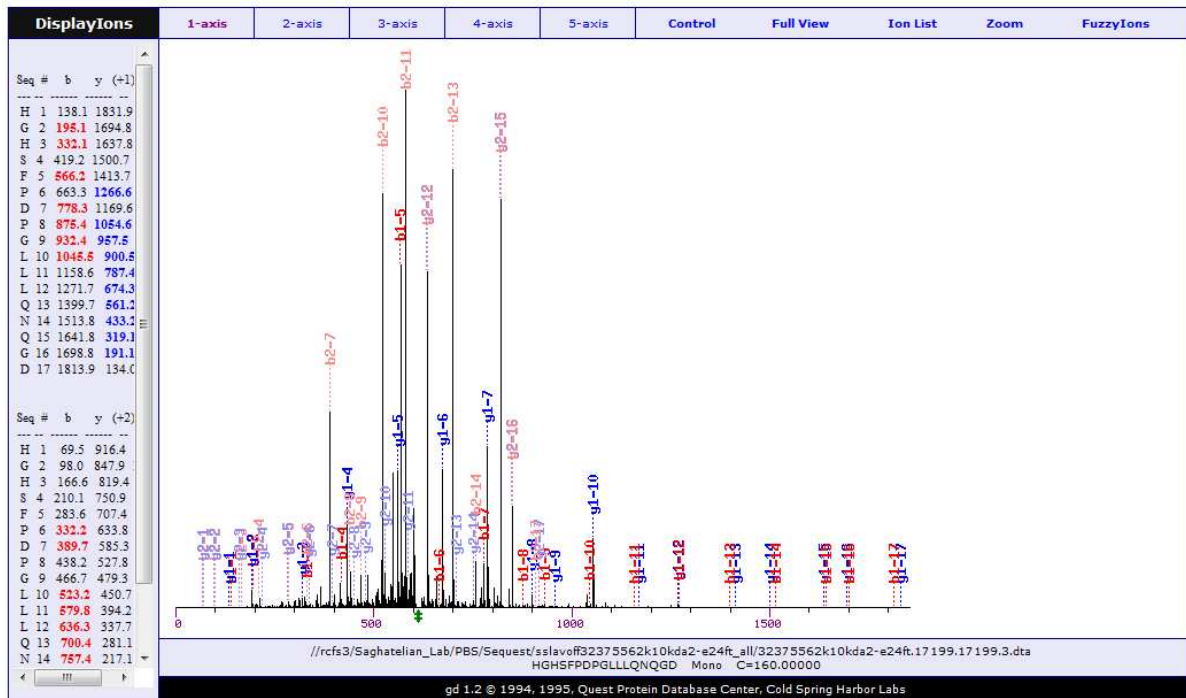

HDASSSPLGPPR Sf: .8



32375562k10kda2-e24ft #12565 RT: 98.66 AV: 1 NL: 6.65E3  
 T: ITMS + c NSI d Full ms2 611.31@cid35.00 [155.00-1235.00]

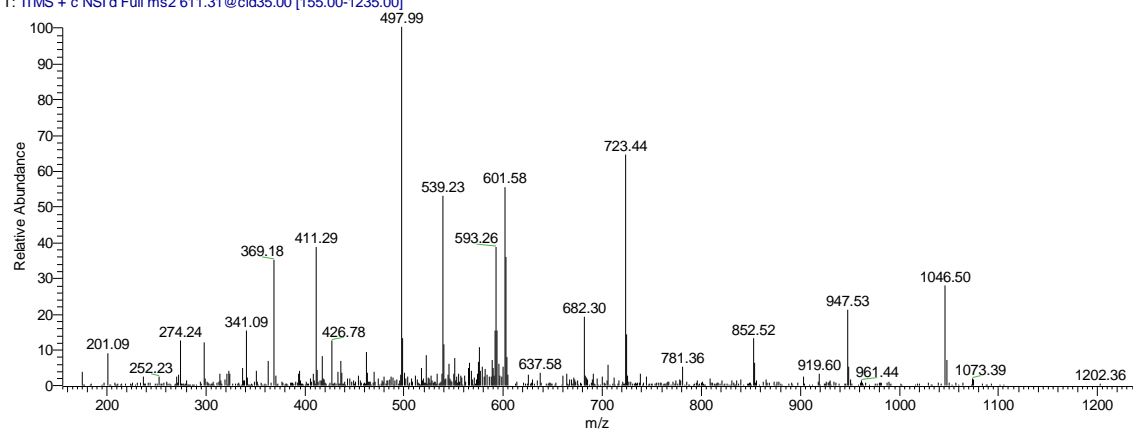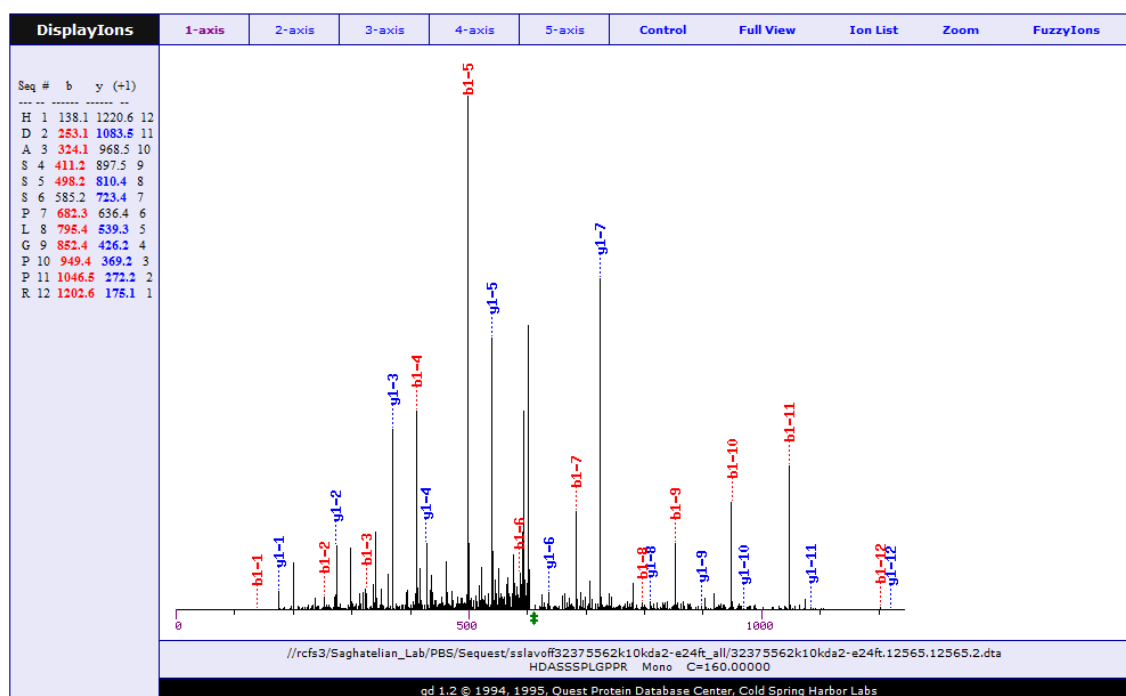

CLVYVLDLITDACTIKPLFNK Sf: .86

32375562k10kda2-e13ft#20550 RT: 153.39 AV: 1 NL: 1.05E4  
 T: ITMS + c NSI d Full ms2 833.45@cid35.00 [215.00-2000.00]

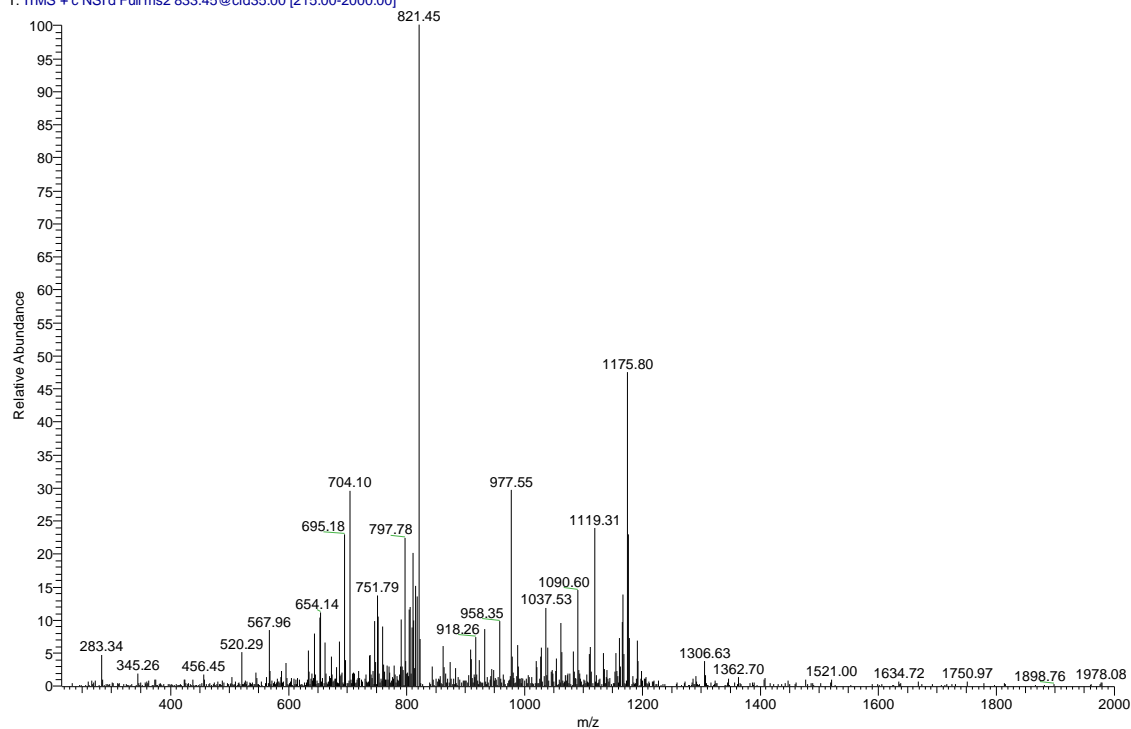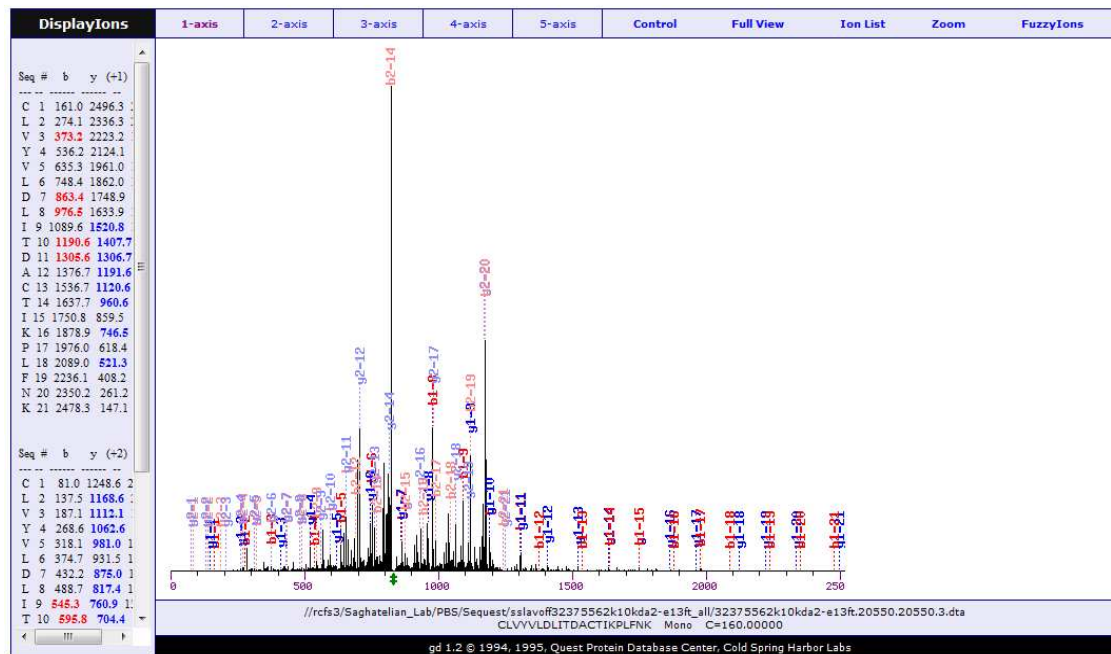

ASPGEAGPAGGAAAGQGAPR Sf: .89

32375562k10kda2-e15ft#6551 RT: 66.44 AV: 1 NL: 1.75E4  
 T: ITMS + c NSI d Full ms2 825.41@cid35.00 [215.00-1665.00]

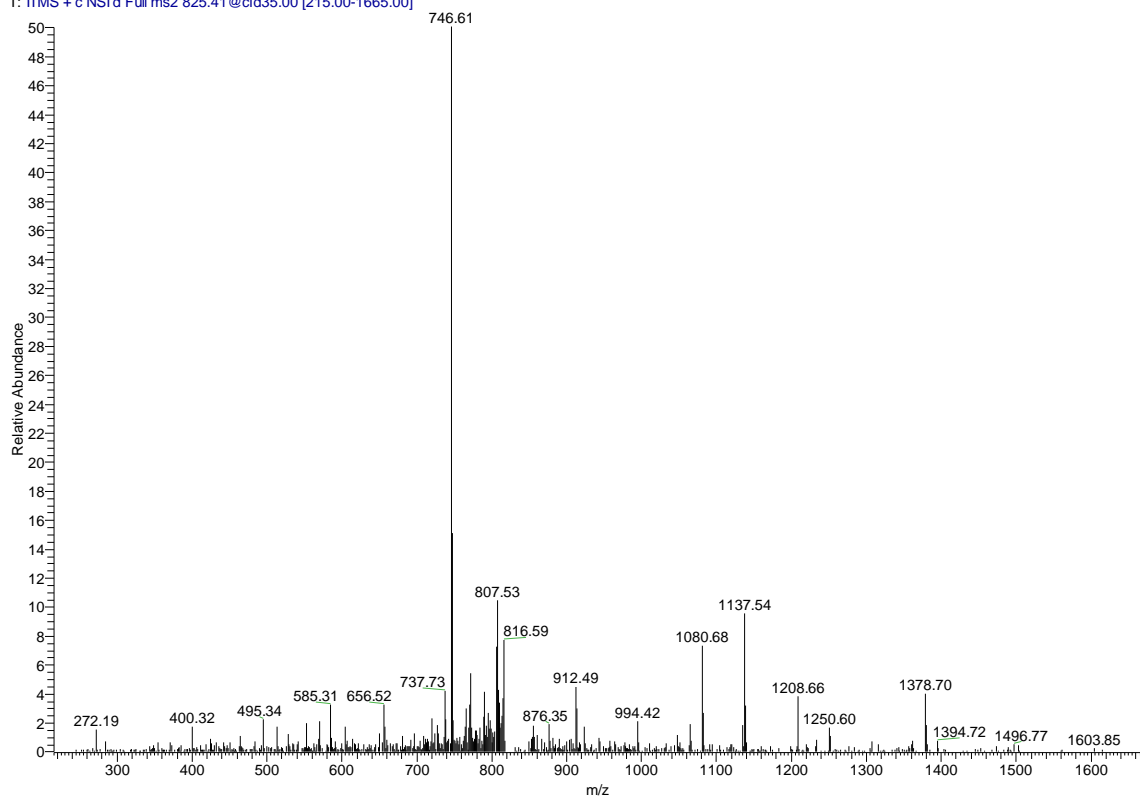

| Displays            | 1-axis | 2-axis | 3-axis | 4-axis | 5-axis | Control | Full View | Ion List | Zoom | FuzzyIons |
|---------------------|--------|--------|--------|--------|--------|---------|-----------|----------|------|-----------|
| Seq # b y (+1)      |        |        |        |        |        |         |           |          |      |           |
| A 1 72.0 1649.8 20  |        |        |        |        |        |         |           |          |      |           |
| S 2 159.1 1578.8 19 |        |        |        |        |        |         |           |          |      |           |
| P 3 256.1 1491.7 18 |        |        |        |        |        |         |           |          |      |           |
| G 4 313.2 1394.7 17 |        |        |        |        |        |         |           |          |      |           |
| E 5 442.2 1337.7 16 |        |        |        |        |        |         |           |          |      |           |
| A 6 513.2 1208.6 15 |        |        |        |        |        |         |           |          |      |           |
| G 7 570.3 1137.6 14 |        |        |        |        |        |         |           |          |      |           |
| P 8 667.3 1080.6 13 |        |        |        |        |        |         |           |          |      |           |
| A 9 738.3 983.5 12  |        |        |        |        |        |         |           |          |      |           |
| G 10 795.4 912.5 11 |        |        |        |        |        |         |           |          |      |           |
| G 11 852.4 855.4 10 |        |        |        |        |        |         |           |          |      |           |
| A 12 923.4 798.4 9  |        |        |        |        |        |         |           |          |      |           |
| A 13 994.5 727.4 8  |        |        |        |        |        |         |           |          |      |           |
| A 14 1065.5 656.3 7 |        |        |        |        |        |         |           |          |      |           |
| G 15 1122.5 585.3 6 |        |        |        |        |        |         |           |          |      |           |
| Q 16 1250.6 528.3 5 |        |        |        |        |        |         |           |          |      |           |
| G 17 1307.6 400.2 4 |        |        |        |        |        |         |           |          |      |           |
| A 18 1378.6 343.2 3 |        |        |        |        |        |         |           |          |      |           |
| P 19 1475.7 272.2 2 |        |        |        |        |        |         |           |          |      |           |
| R 20 1631.8 175.1 1 |        |        |        |        |        |         |           |          |      |           |

  

//rcfs3/Saghatelian\_Lab/PBS/Sequest/sslavoff32375562k10kda2-e15ft\_all/32375562k10kda2-e15ft.6551.6551.2.dta  
 ASPGEAGPAGGAAAGQGAPR Mono C=160.00000  
 gd 1.2 © 1994, 1995, Quest Protein Database Center, Cold Spring Harbor Labs

GAWGGQLATAGSGPGQR Sf: .96

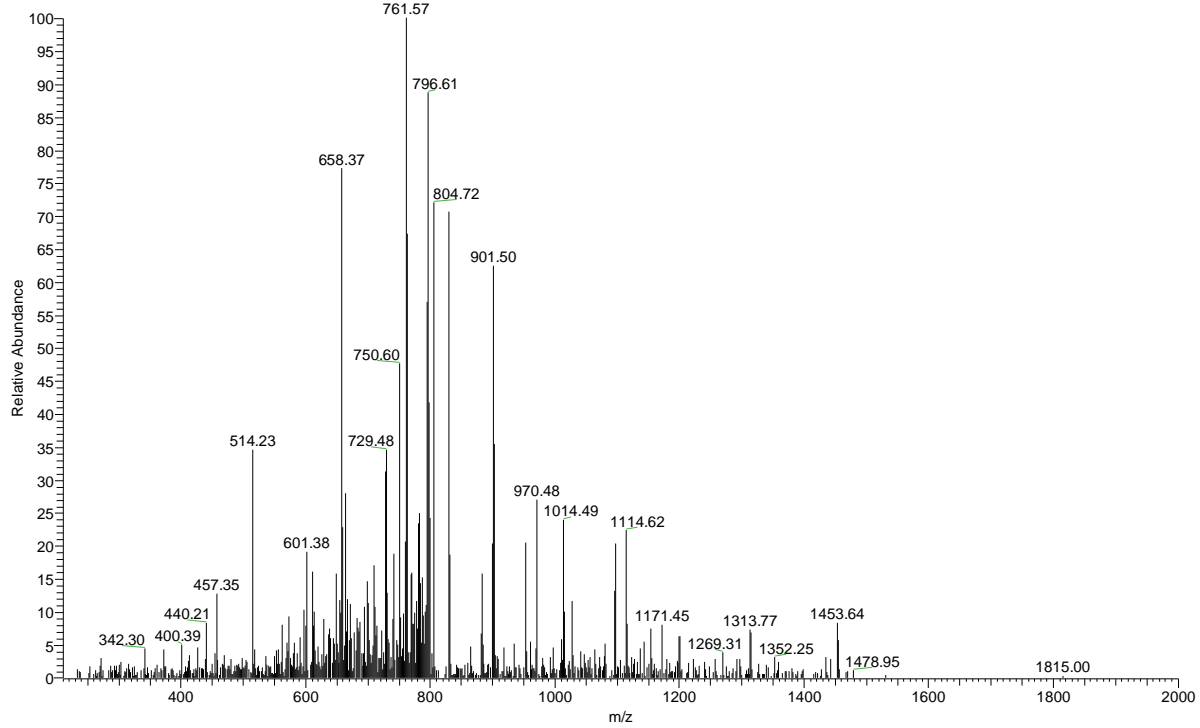

| DisplayIons                                                                                                                                                                                                                                                                                                                                                                                                        | 1-axis | 2-axis | 3-axis | 4-axis | 5-axis | Control | Full View | Ion List | Zoom | FuzzyIons |
|--------------------------------------------------------------------------------------------------------------------------------------------------------------------------------------------------------------------------------------------------------------------------------------------------------------------------------------------------------------------------------------------------------------------|--------|--------|--------|--------|--------|---------|-----------|----------|------|-----------|
| <pre> Seq #  b  y (+1) ----- G 1  58.0 1627.8 18 A 2 129.1 1570.8 17 W 3 315.1 1499.7 16 G 4 372.2 1313.7 15 G 5 429.2 1256.6 14 G 6 486.2 1199.6 13 Q 7 614.3 1142.6 12 L 8 727.4 1014.5 11 A 9 798.4 901.4 10 T 10 899.4 830.4 9 A 11 970.5 729.4 8 G 12 1027.5 658.3 7 S 13 1114.5 601.3 6 G 14 1171.5 514.3 5 P 15 1268.6 457.3 4 G 16 1325.6 360.2 3 Q 17 1453.7 303.2 2 R 18 1609.8 175.1 1           </pre> |        |        |        |        |        |         |           |          |      |           |
| <p>//rcfs3/Saghatelian_Lab/PBS/Sequest/sstlavoff32375562k10kda2-e10ft_all/32375562k10kda2-e10ft.10514.10514.2.dta<br/>           GAWGGQLATAGSGPGQR Mono C=160.00000</p>                                                                                                                                                                                                                                            |        |        |        |        |        |         |           |          |      |           |
| <p>gd 1.2 © 1994, 1995, Quest Protein Database Center, Cold Spring Harbor Labs</p>                                                                                                                                                                                                                                                                                                                                 |        |        |        |        |        |         |           |          |      |           |

DTEVLINTM\*SK Sf:.79

32238am562kerlic-te22n3#9104 RT: 110.78 AV: 1 NL: 1.40E3  
 T: ITMS + c NSI d Full ms2 625.81 @cid35.00 [160.00-1265.00]

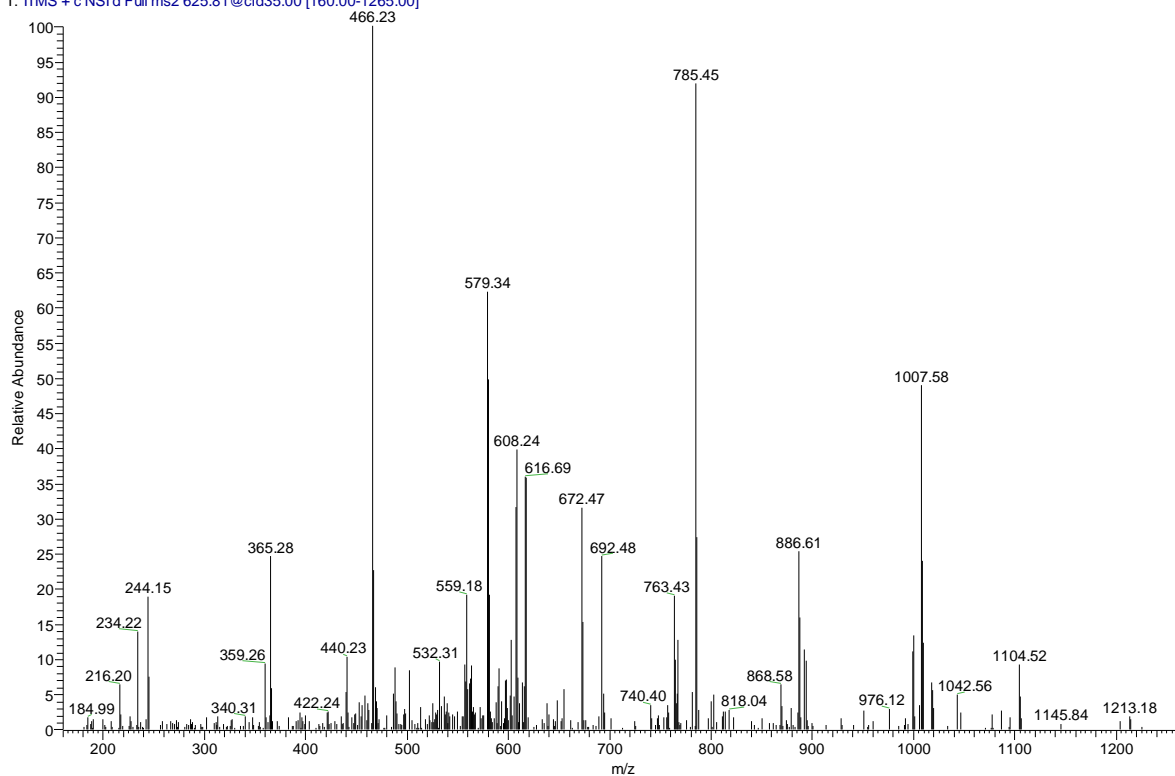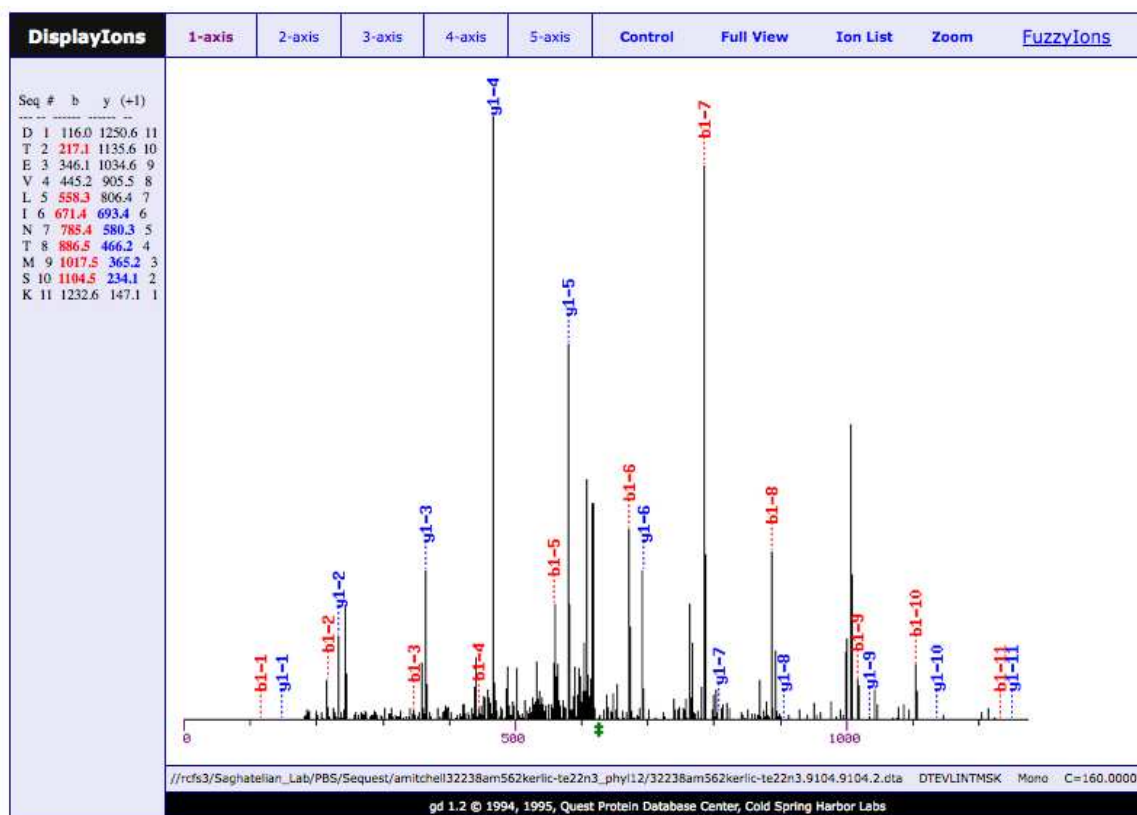

# VYKWLLCNVE Sf: .78

32238am562kerlic-te09n2 #7496 RT: 82.96 AV: 1 NL: 2.50E3  
T: ITMS + c NSI d Full ms2 662.34@cid35.00 [170.00-1335.00]

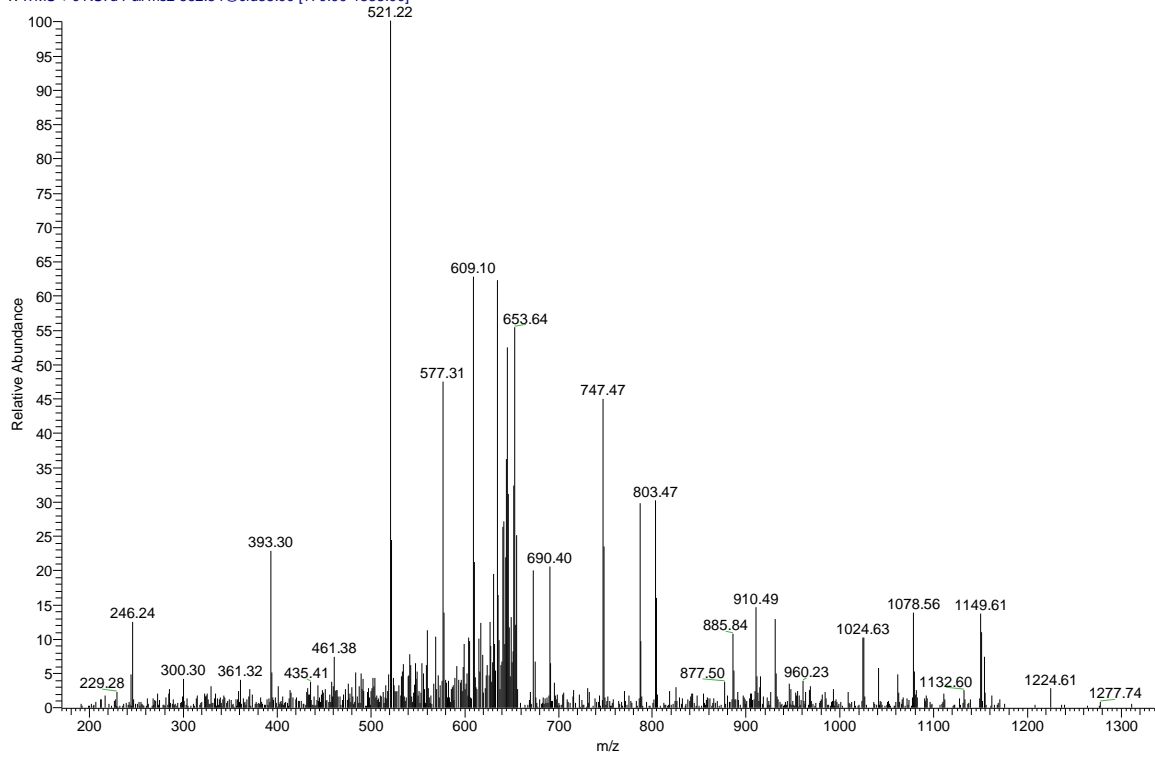

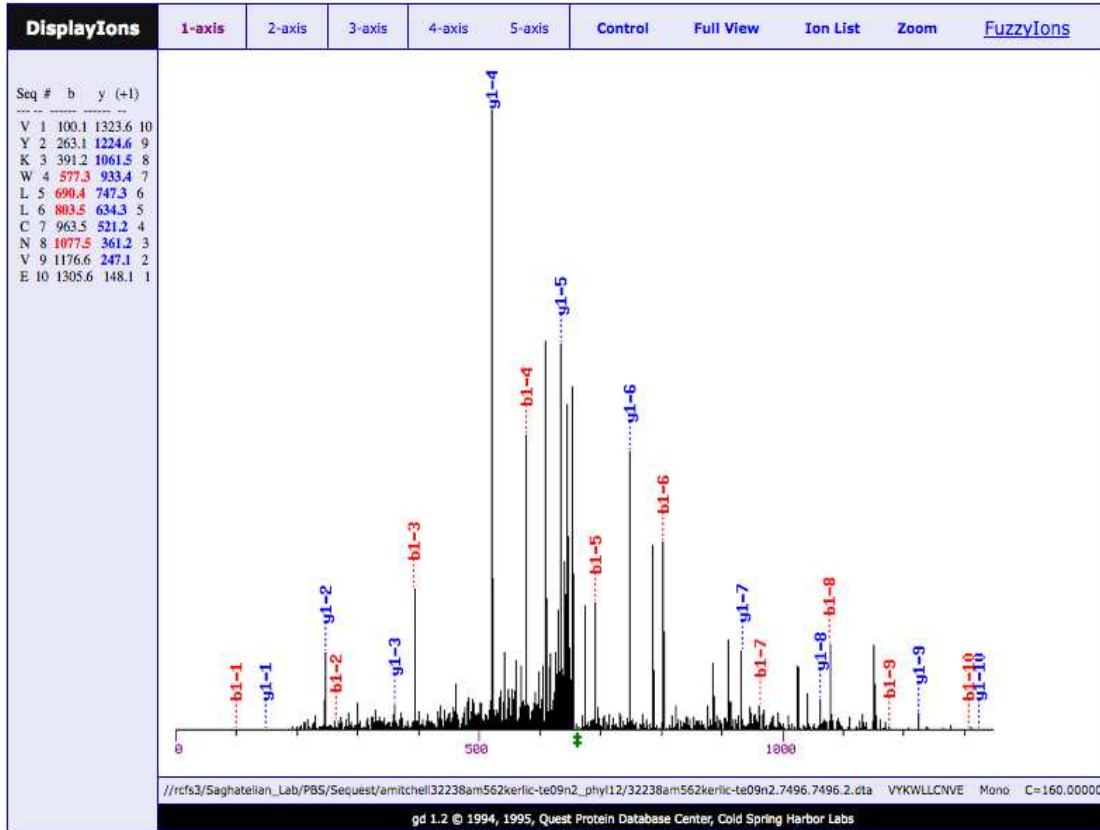

CPFVLLMSSMILLR Sf: .81

32238am562kerlic-te22n3 #11578 RT: 138.26 AV: 1 NL: 6.26E3  
 T: ITMS + c NSI d Full ms2 560.63@cid35.00 [140.00-1695.00]

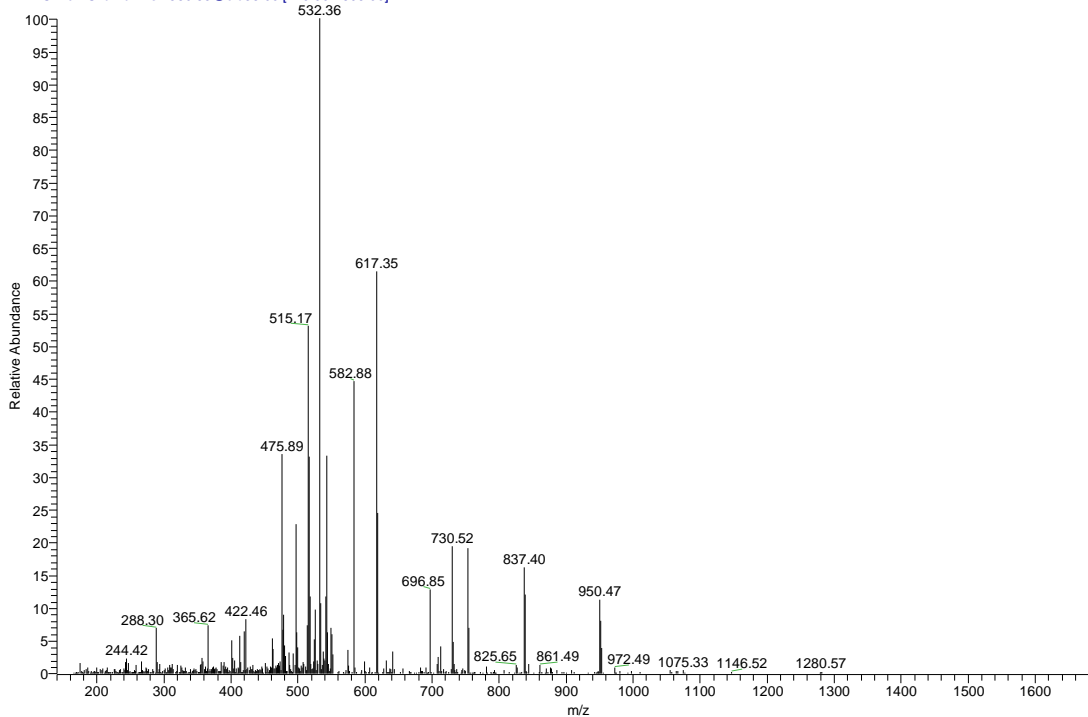

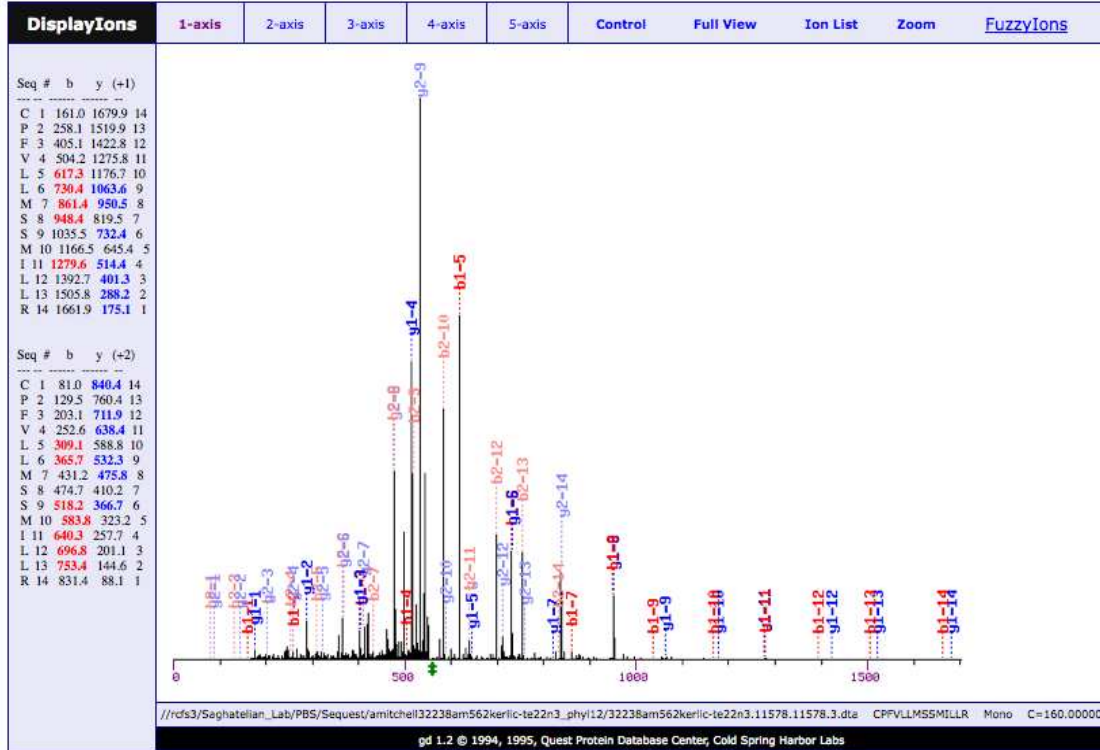

### KPVFLLLLSIR Sf: .85

32238am562kerlic-te07n1 #9618 RT: 110.91 AV: 1 NL: 9.63E3  
T: ITMS + c NSI d Full ms2 649.93@cid35.00 [165.00-1310.00]

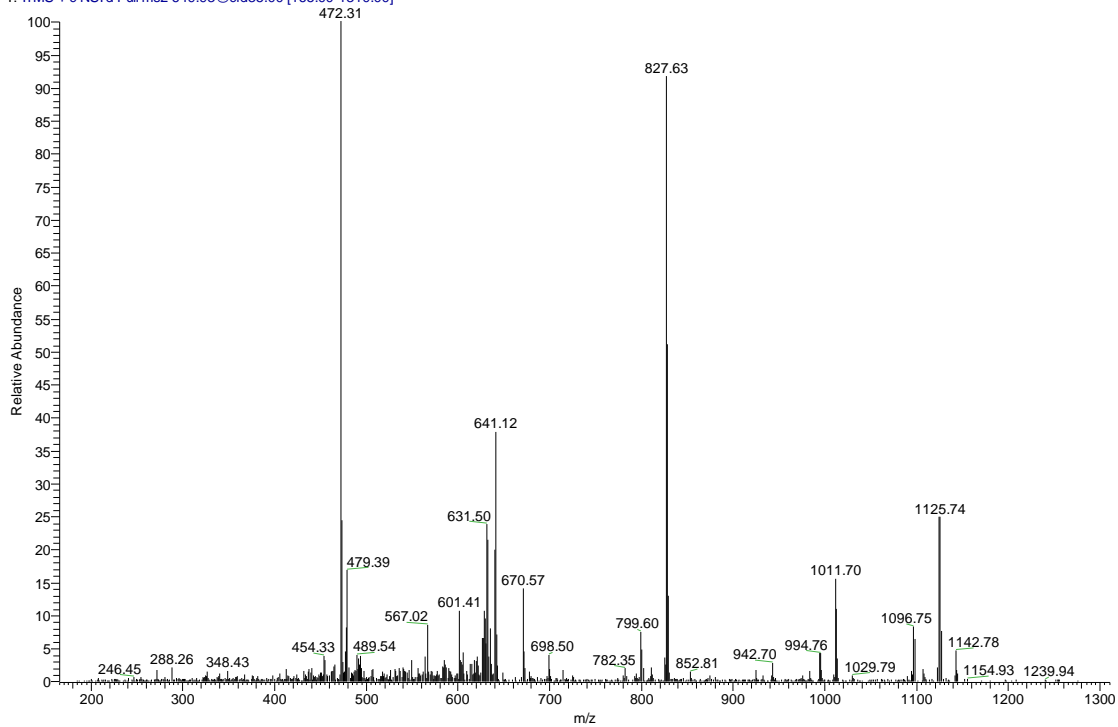



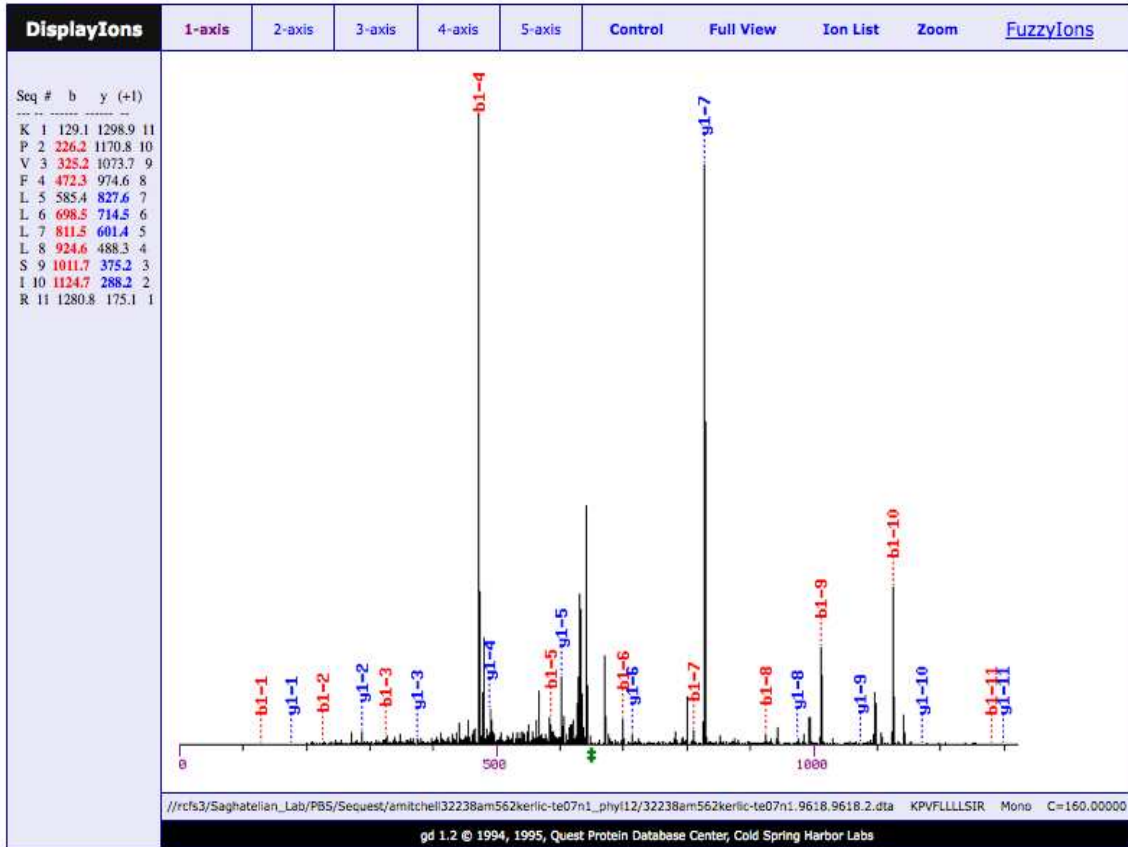

FIPTEAWYSAGR Sf: .79

32238am562kerlic-te20n1 #8194 RT: 110.10 AV: 1 NL: 3.53E3  
 T: ITMS + c NSI d Full ms2 700.85@cid35.00 [180.00-1415.00]

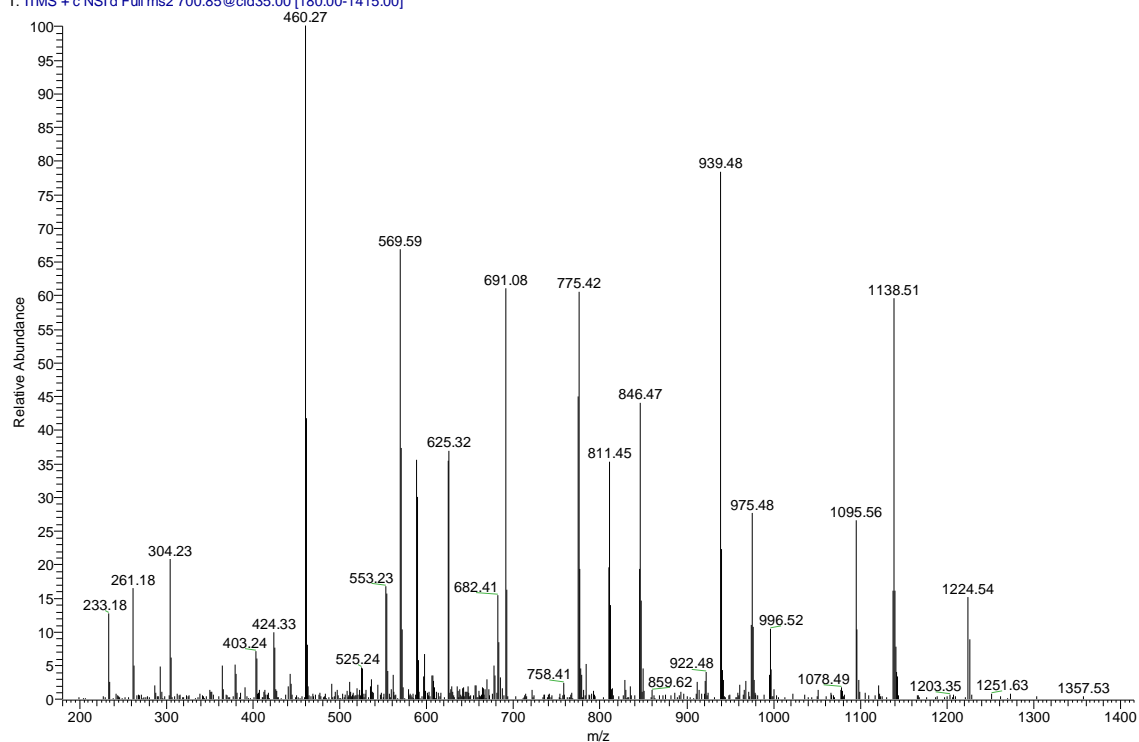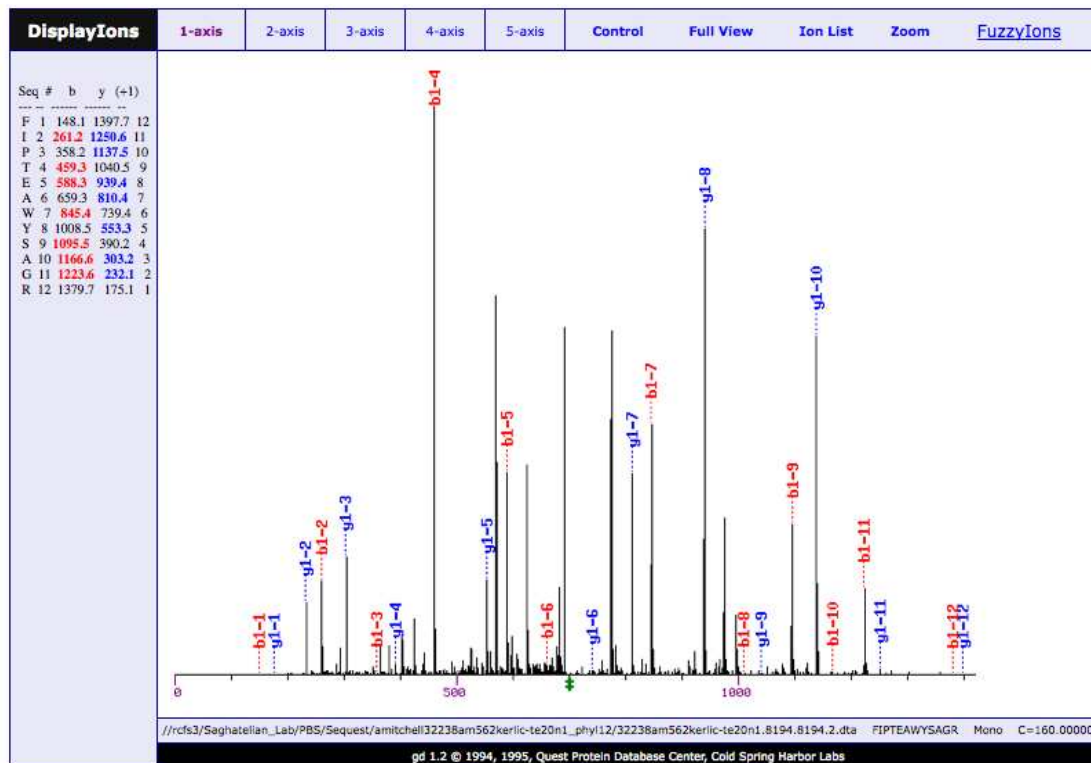

QVLTNKNQ Sf: .81

32238am562kerlic-te26n3 #7386 RT: 84.76 AV: 1 NL: 3.22E3  
 T: ITMS + c NSI d Full ms2 529.30@cid35.00 [135.00-1070.00]

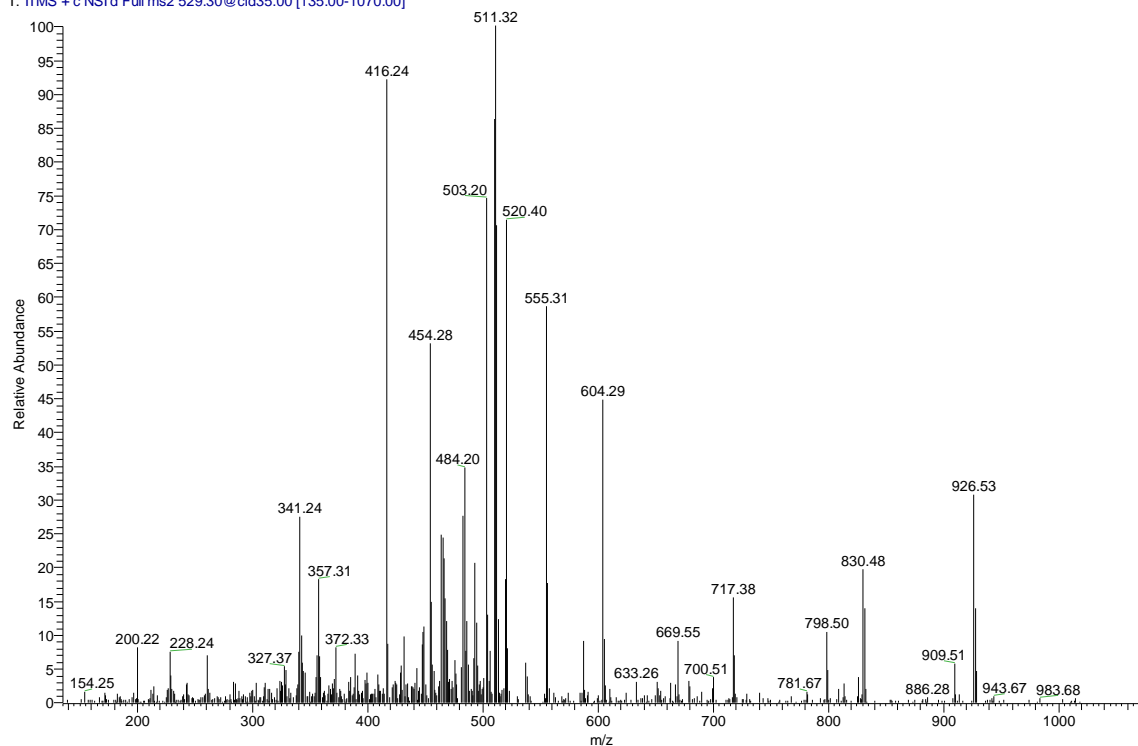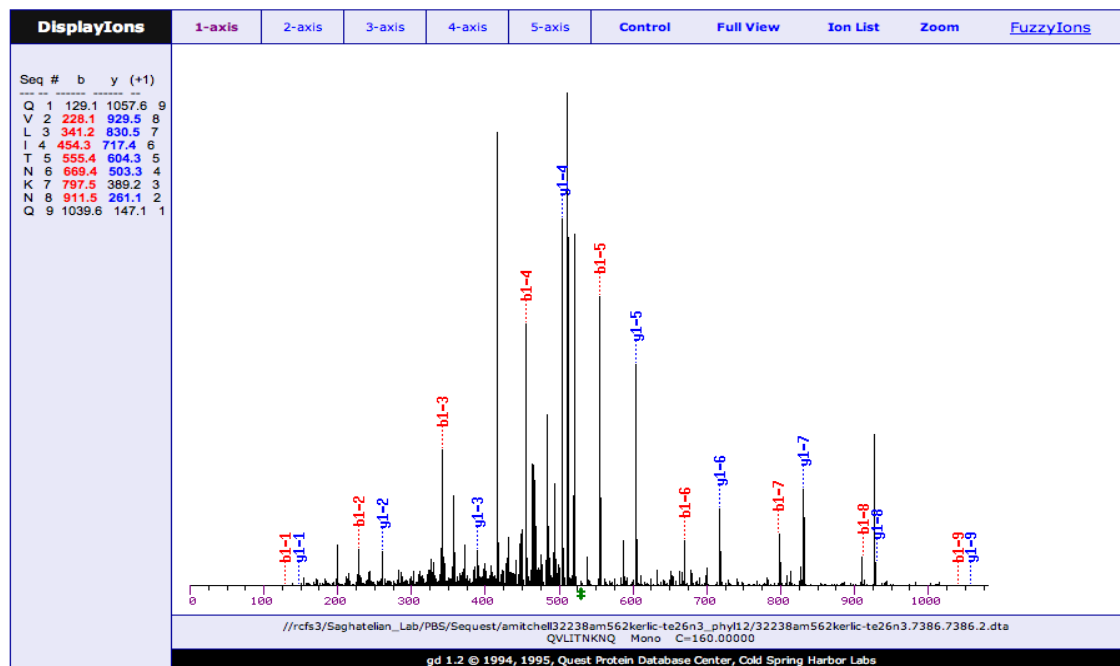

IKFLLAPEENK Sf: .86

32238am562keric-te09n1 #8762 RT: 92.78 AV: 1 NL: 1.73E3  
 T: ITMS + c NSI d Full ms2 651.38@cid35.00 [165.00-1315.00]

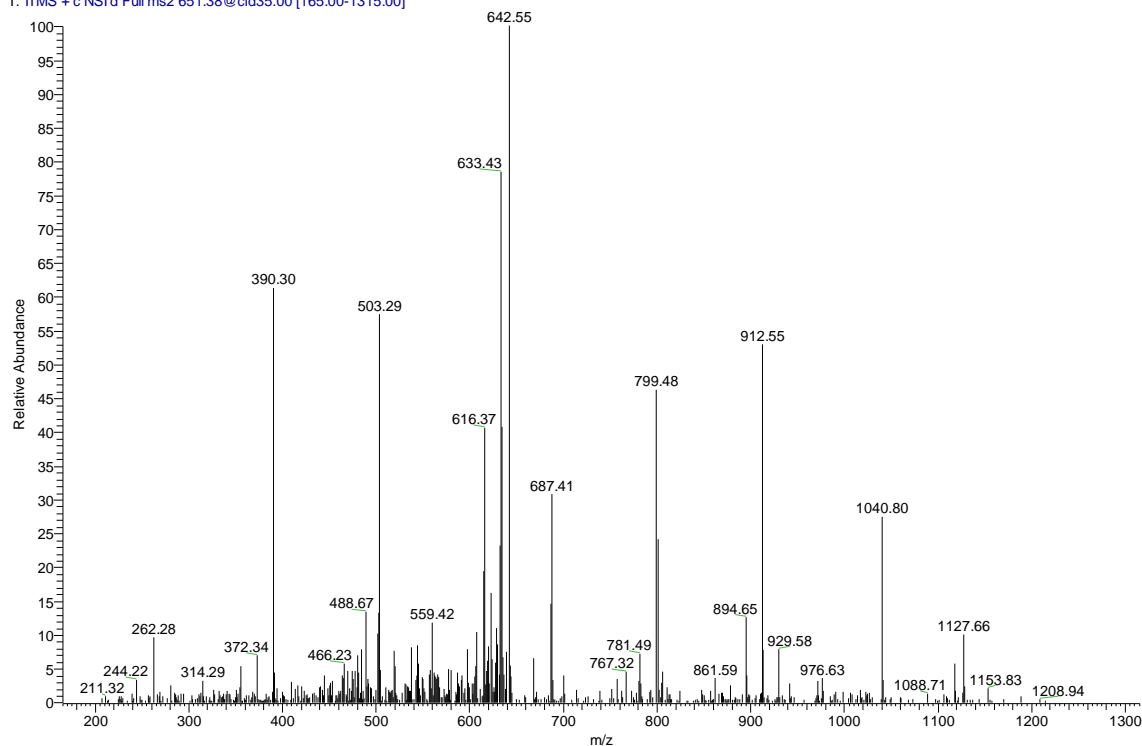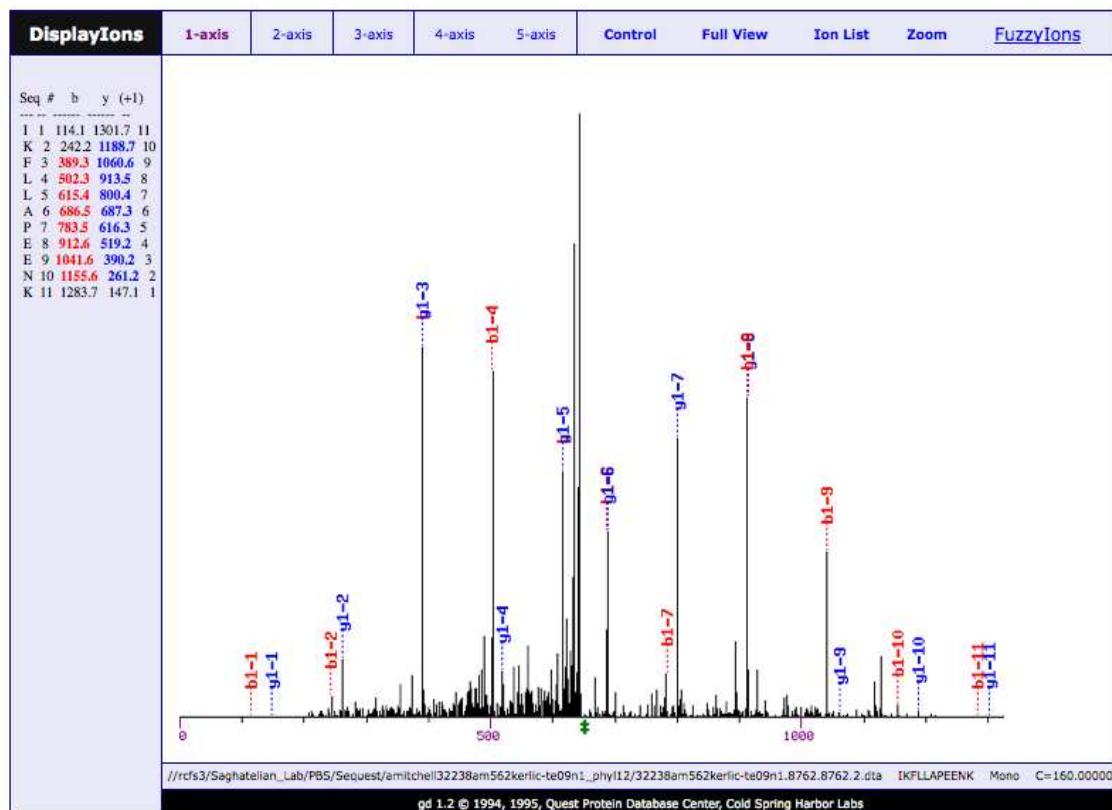

QRIPC[VILTK]Sf: .84

32238am562kerlic-te12n3 #5738 RT: 69.52 AV: 1 NL: 3.20E3  
 T: ITMS + c NSI d Full ms2 663.89@cid35.00 [170.00-1340.00]

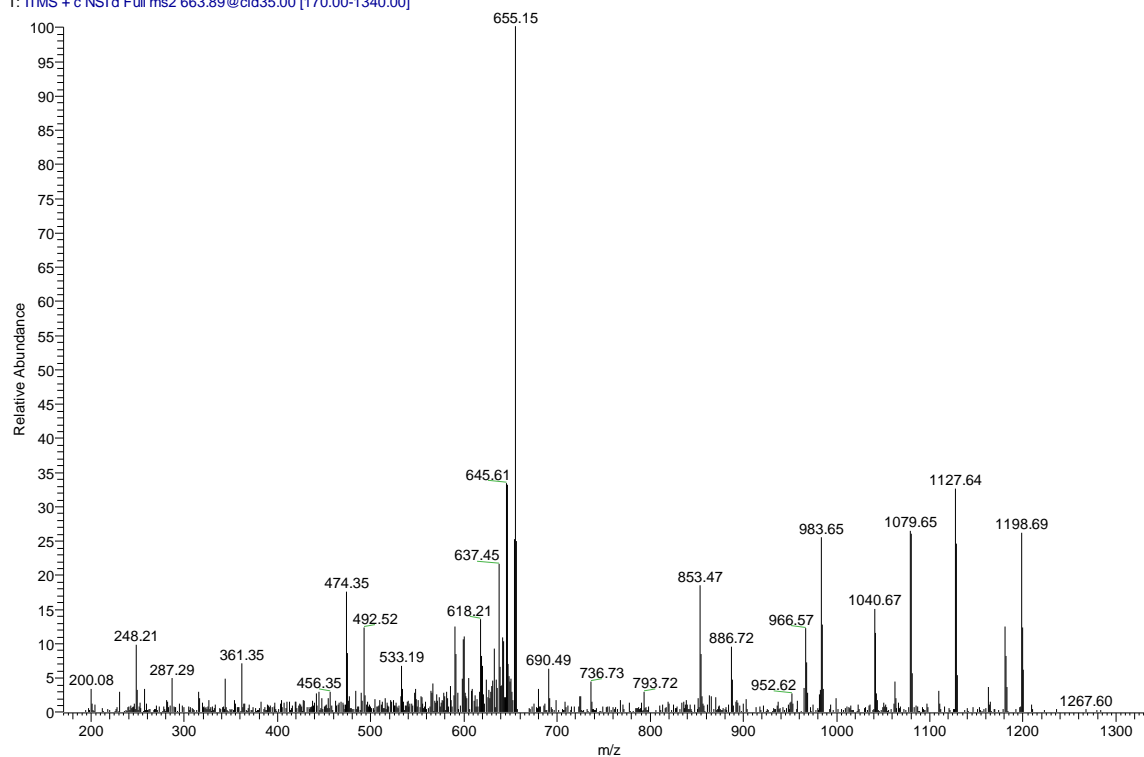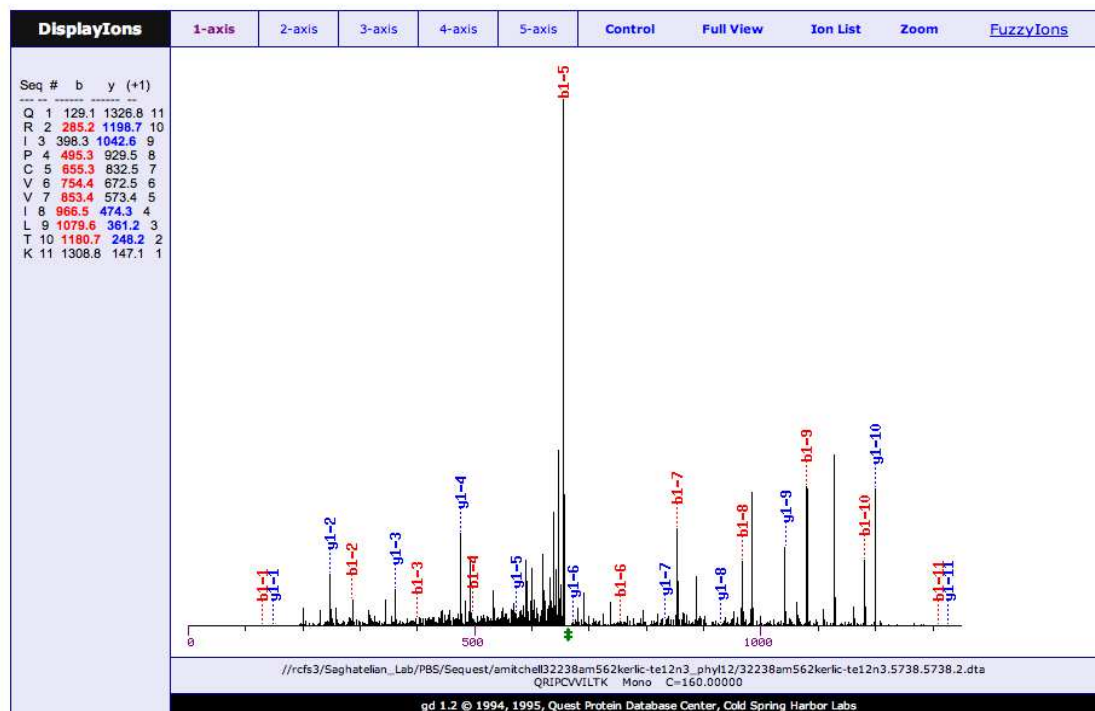

KTLPMGMIR Sf: .75

32238am562kerlic-te12n1 #8593 RT: 92.93 AV: 1 NL: 1.58E3  
 T: ITMS + c NSI d Full ms2 589.30@cid35.00 [150.00-1190.00]

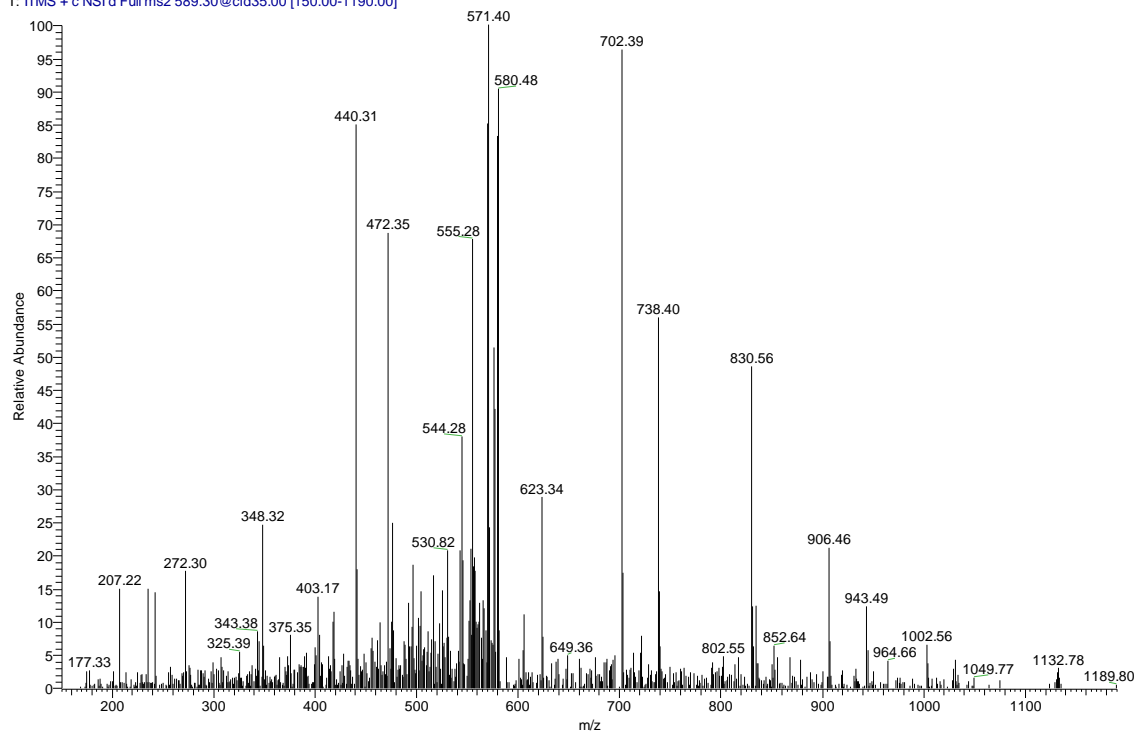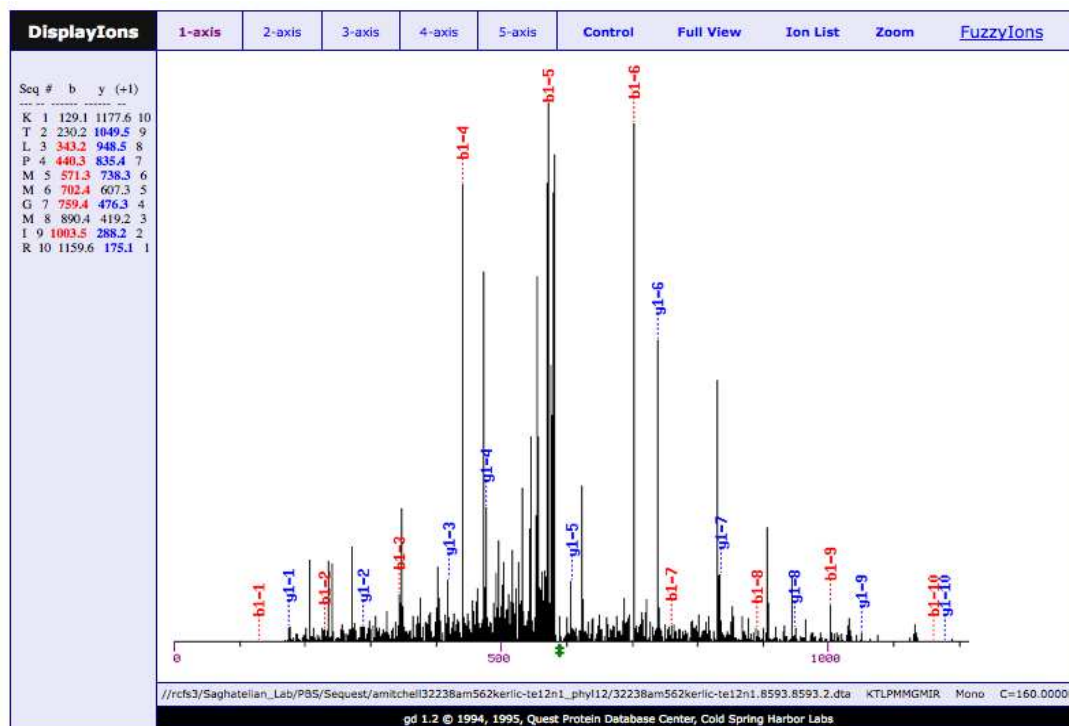

QVNEETLK Sf: .78

32238am562kerlic-te35n1 #4650 RT: 65.22 AV: 1 NL: 1.77E3  
 T: ITMS + c NSI d Full ms2 480.75@cid35.00 [120.00-975.00]

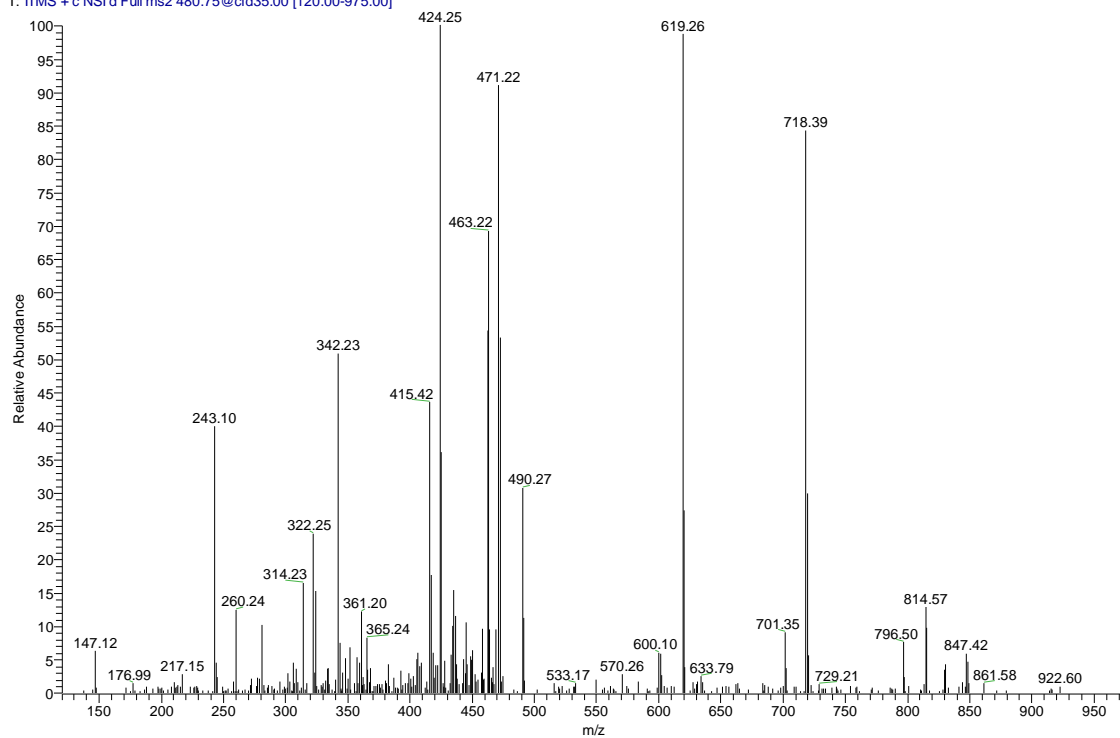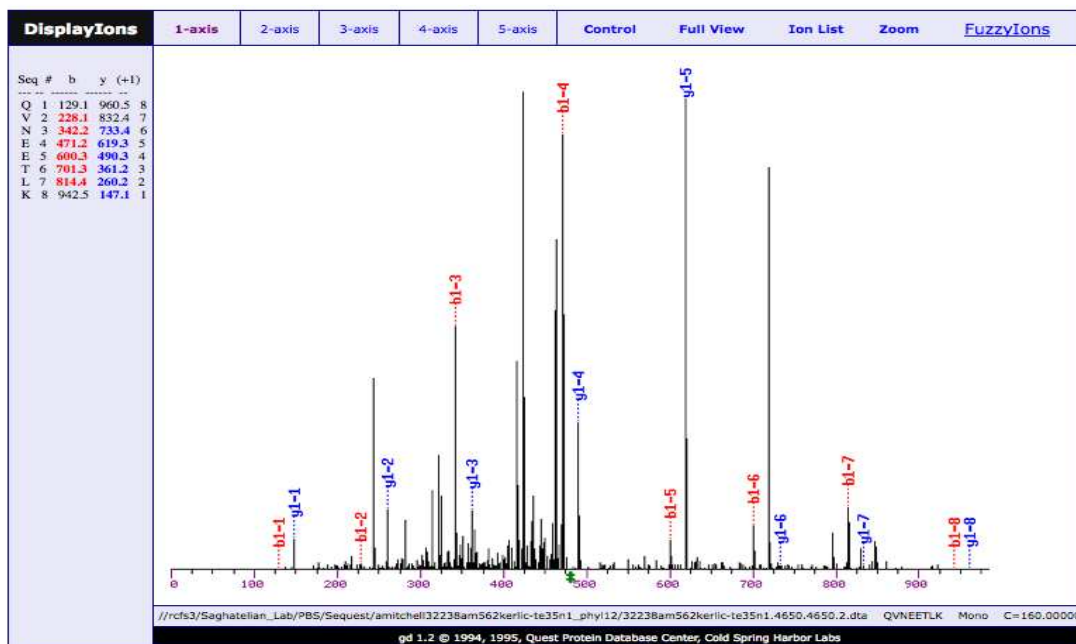

KNLFQNTSR Sf: .79

32238am562kerlic-te35n3 #5230 RT: 71.14 AV: 1 NL: 1.99E3  
 T: ITMS + c NSI d Full ms2 554.29@cid35.00 [140.00-1120.00]

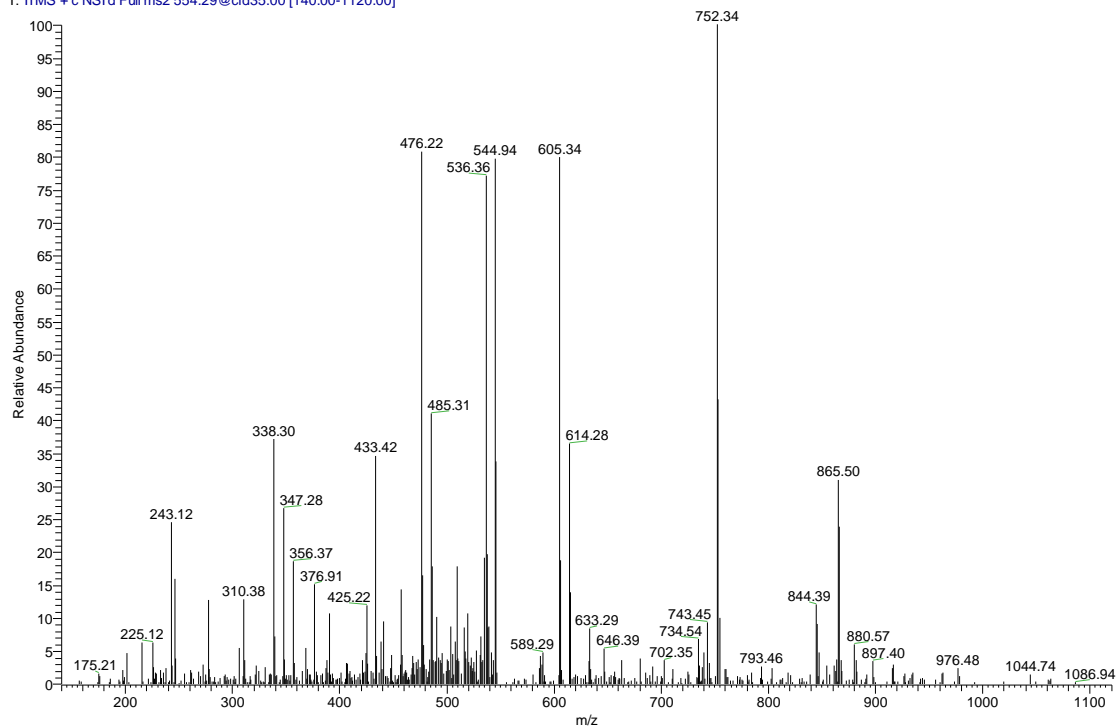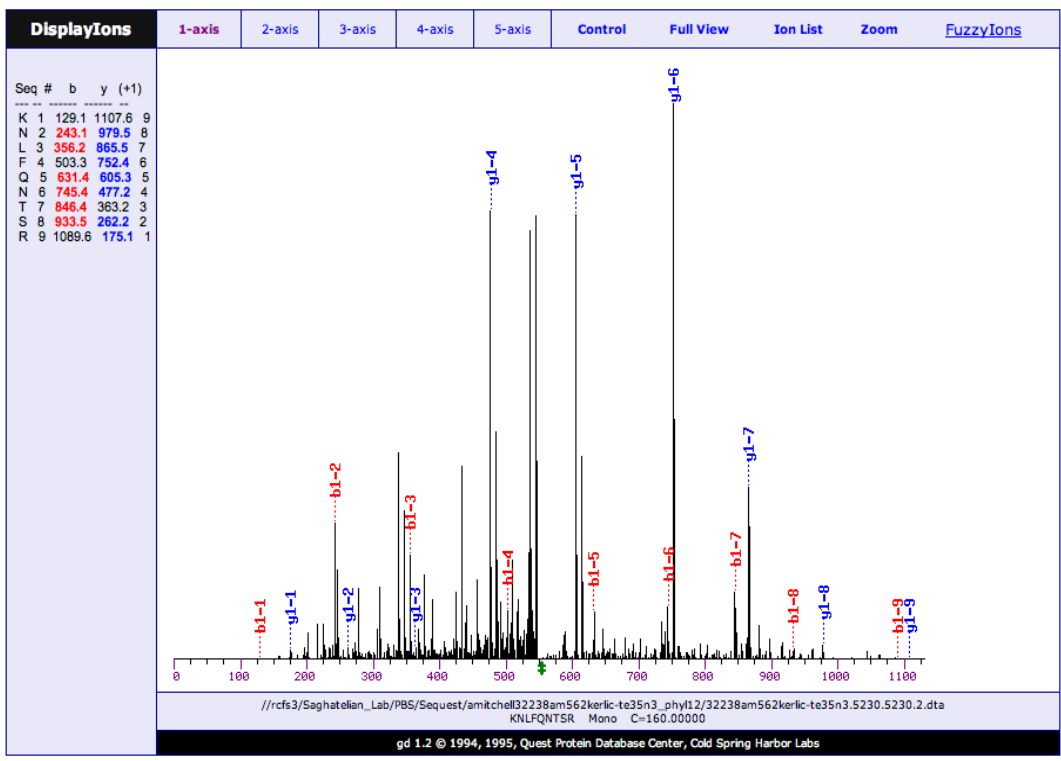

RAGYSELE Sf: .87



32238am562kerlic-te14n3 #3416 RT: 47.46 AV: 1 NL: 5.75E3  
 T: ITMS + c NSI'd Full ms2 462.72@cid35.00 [115.00-940.00]

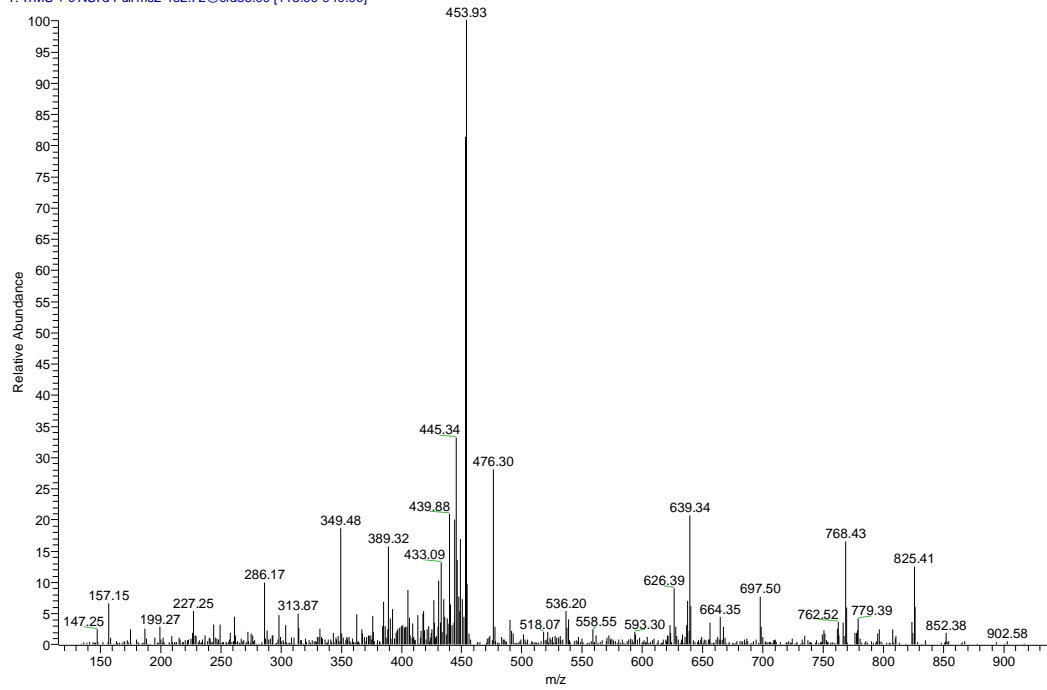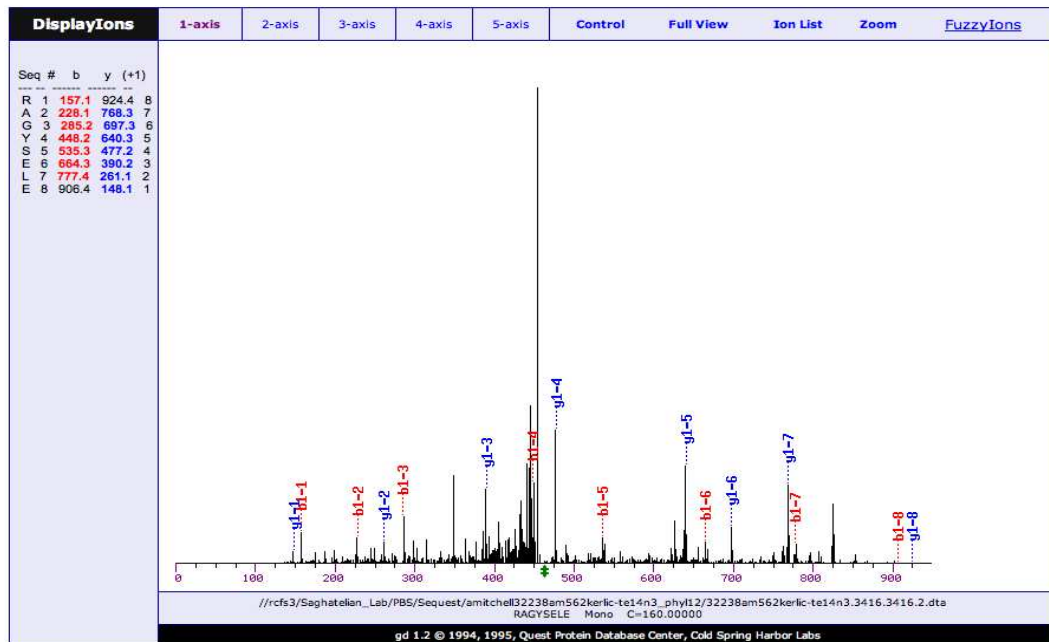

QM\*SSNILK Sf: .76

32238am562kerlic-te09n1 #5205 RT: 64.36 AV: 1 NL: 1.16E4  
 T: ITMS + c NSI d Full ms2 469.24@cid35.00 [115.00-950.00]

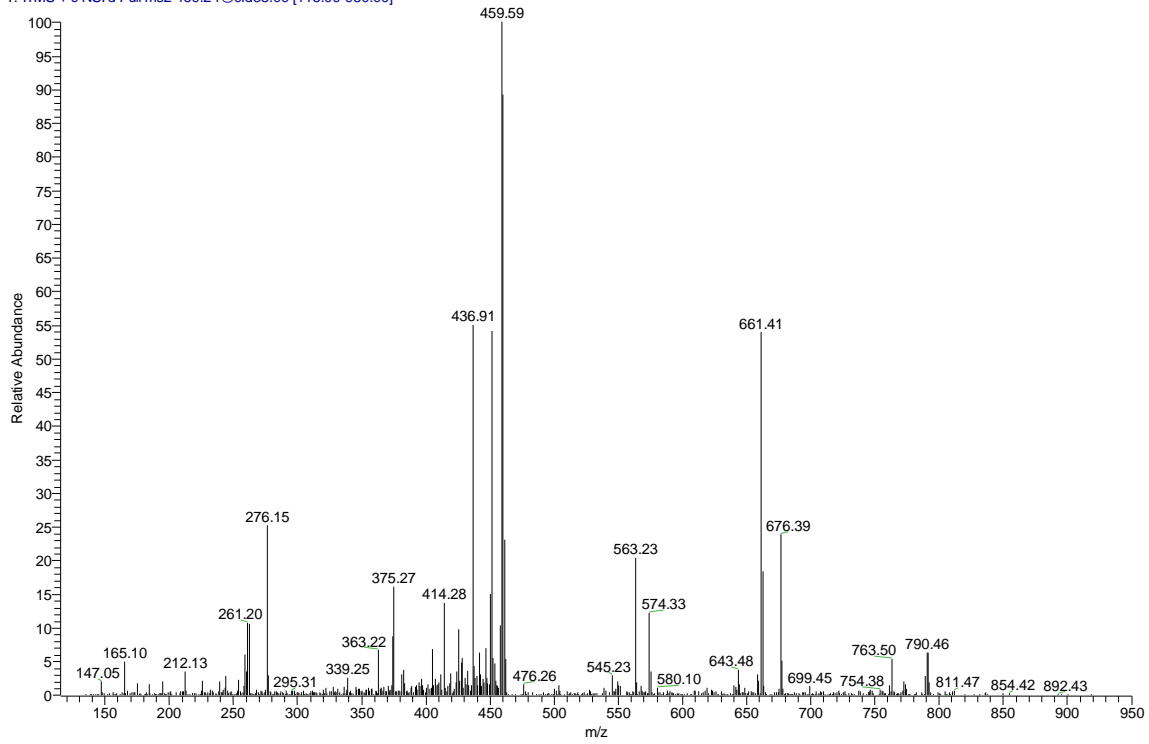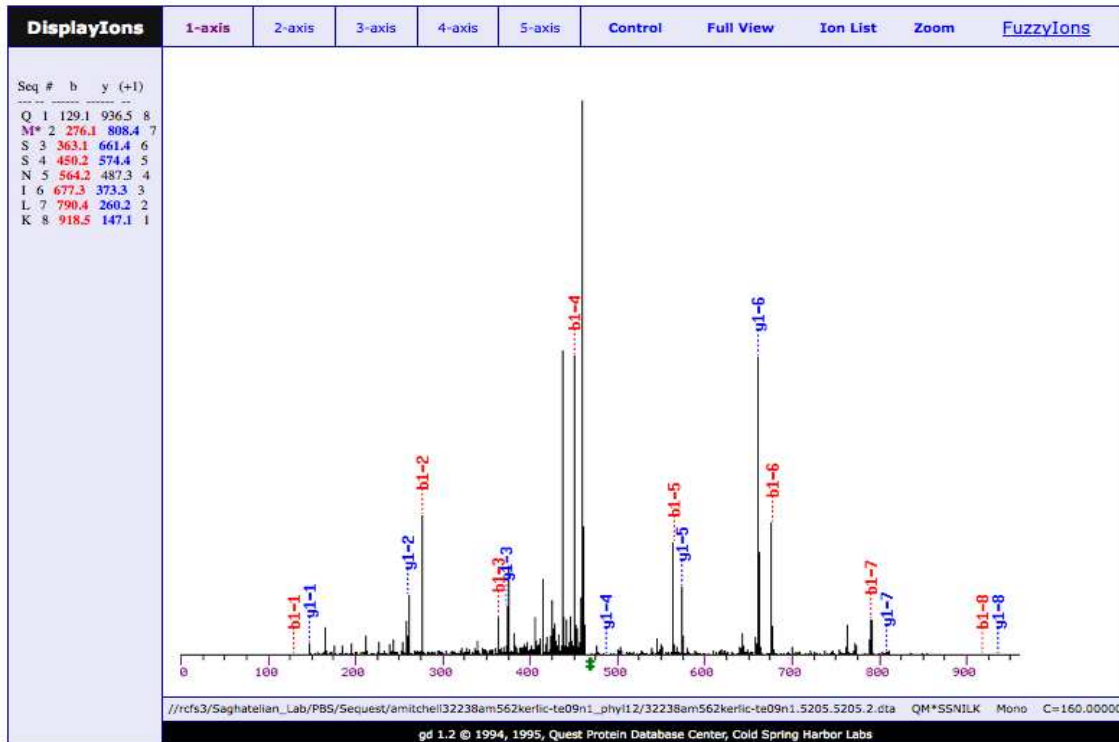

VAHENYMKFK Sf: .82

32238am562kerlic-te15n3 #5693 RT: 66.11 AV: 1 NL: 2.12E4  
 T: ITMS + c NSI d Full ms2 635.33@cid35.00 [160.00-1285.00]

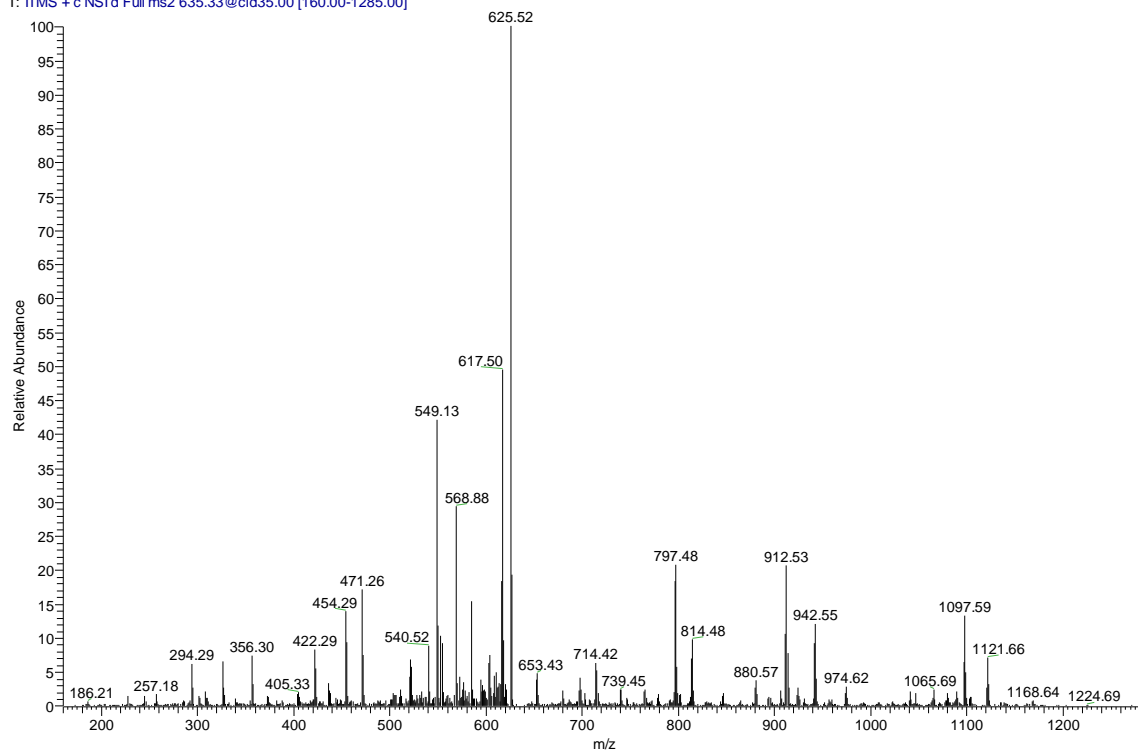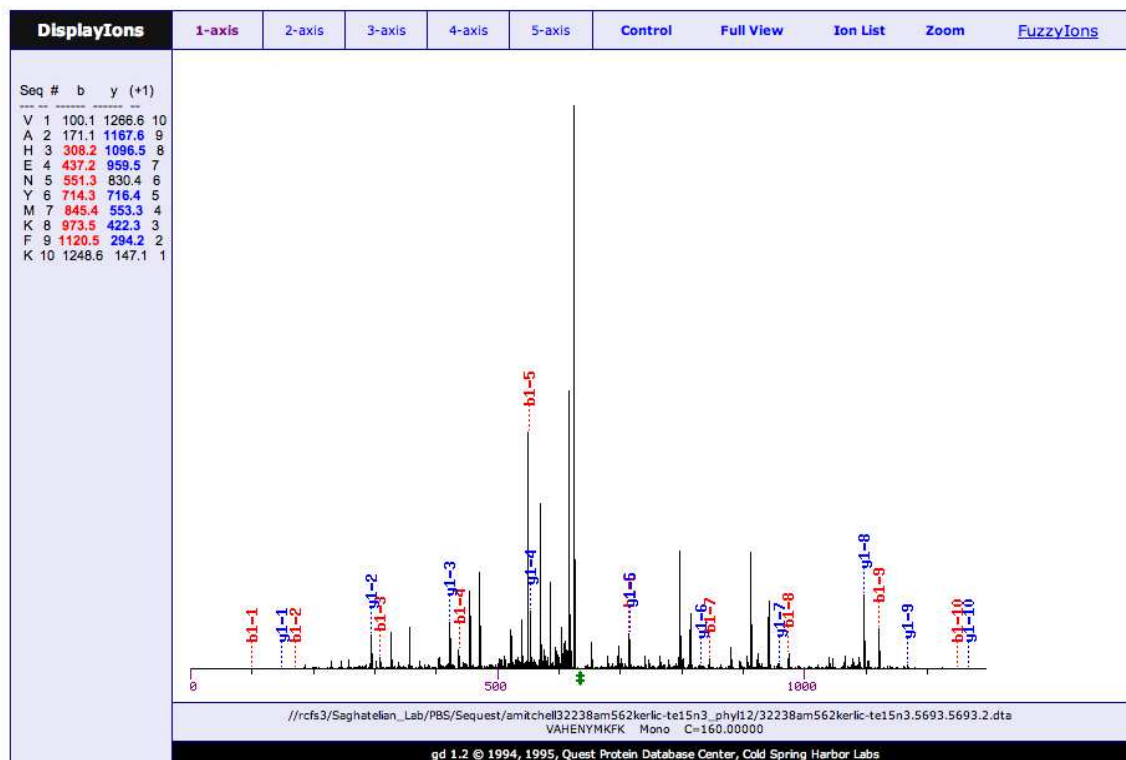

GIALGDIPNAR Sf: .94

32375562k10kda2-e11ft#11219 RT: 98.34 AV: 1 NL: 2.56E5  
 T: ITMS + c NSI d Full ms2 549.31 @cid35.00 [140.00-1110.00]

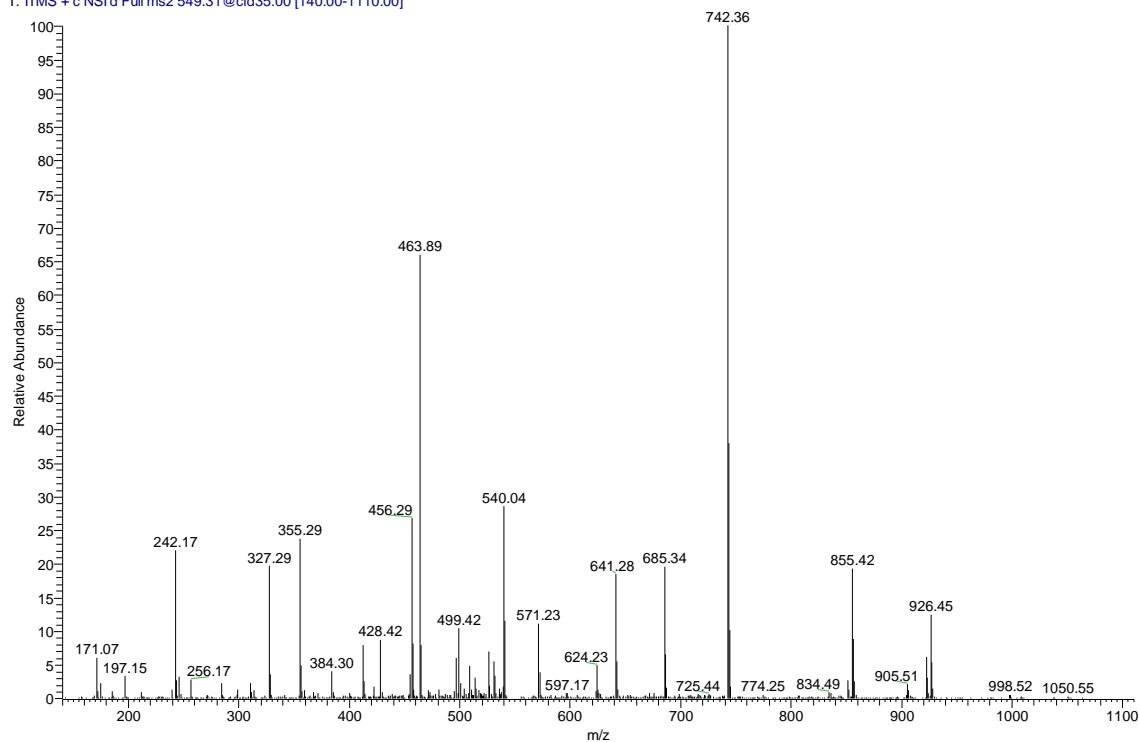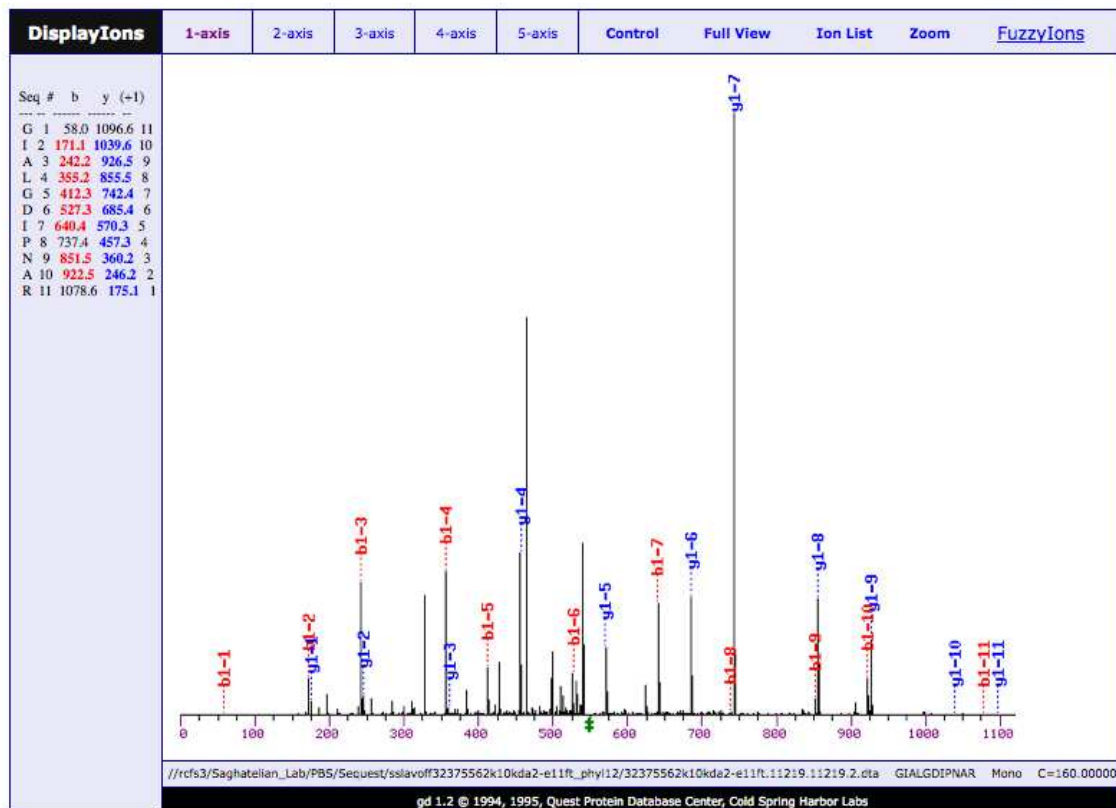

# VLLDQHQR Sf: .80

32375562k10kda2-e09ft #4773 RT: 59.97 AV: 1 NL: 2.00E4  
 T: ITMS + c NSI d Full ms2 505.79@cid35.00 [125.00-1025.00]

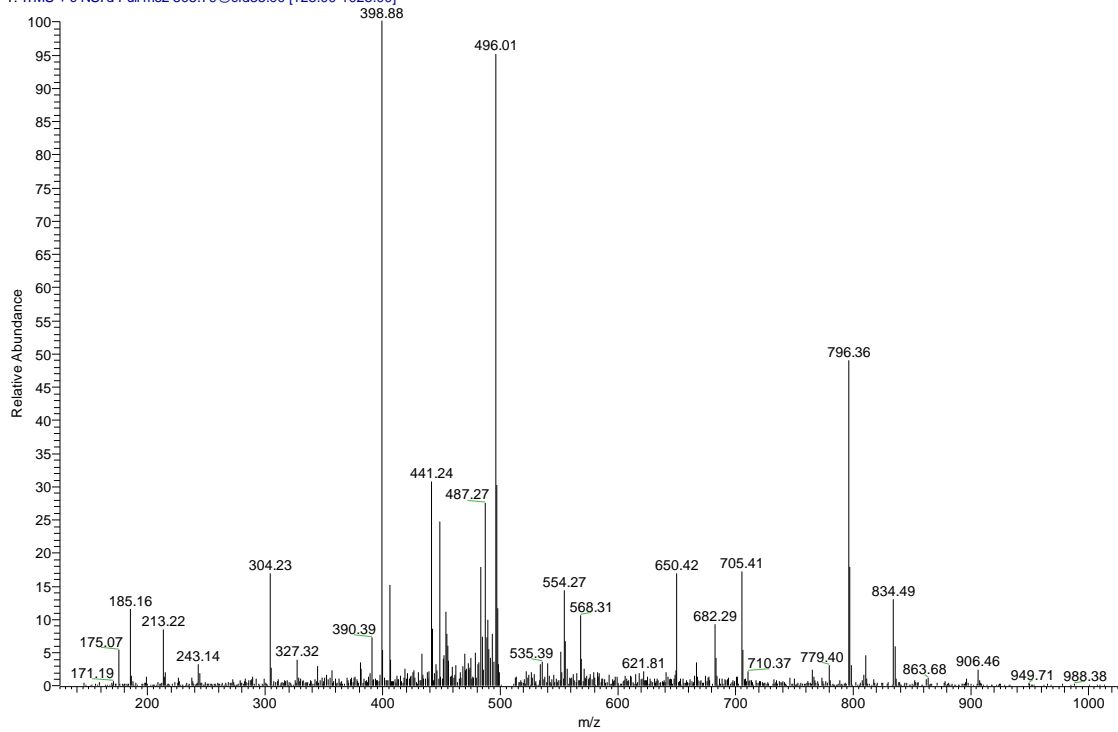

**DisplayIons**
1-axis
2-axis
3-axis
4-axis
5-axis
Control
Full View
Ion List
Zoom
BlurryIons

| Seq # | b | y (+1)         |
|-------|---|----------------|
| V     | 1 | 100.1 1008.6 8 |
| L     | 2 | 213.2 909.5 7  |
| L     | 3 | 326.2 796.4 6  |
| D     | 4 | 441.3 683.3 5  |
| Q     | 5 | 569.3 568.3 4  |
| H     | 6 | 706.4 440.2 3  |
| Q     | 7 | 834.4 303.2 2  |
| R     | 8 | 990.5 175.1 1  |

//irds3/Saghatelian\_Lab/PBS/Secuest/sslavoff32375562k10kda2-e09ft\_phy112/32375562k10kda2-e09ft.4773.4773.2.dta VLLDQHQR Mono C=160.00000

gd 1.2 © 1994, 1995, Quest Protein Database Center, Cold Spring Harbor Labs

# YYELQRGTR Sf: .84

32238am562kerlic-te29n1 #3557 RT: 51.09 AV: 1 NL: 8.58E2  
 T: ITMS + c NSI d Full ms2 593.30@cid35.00 [150.00-1200.00]

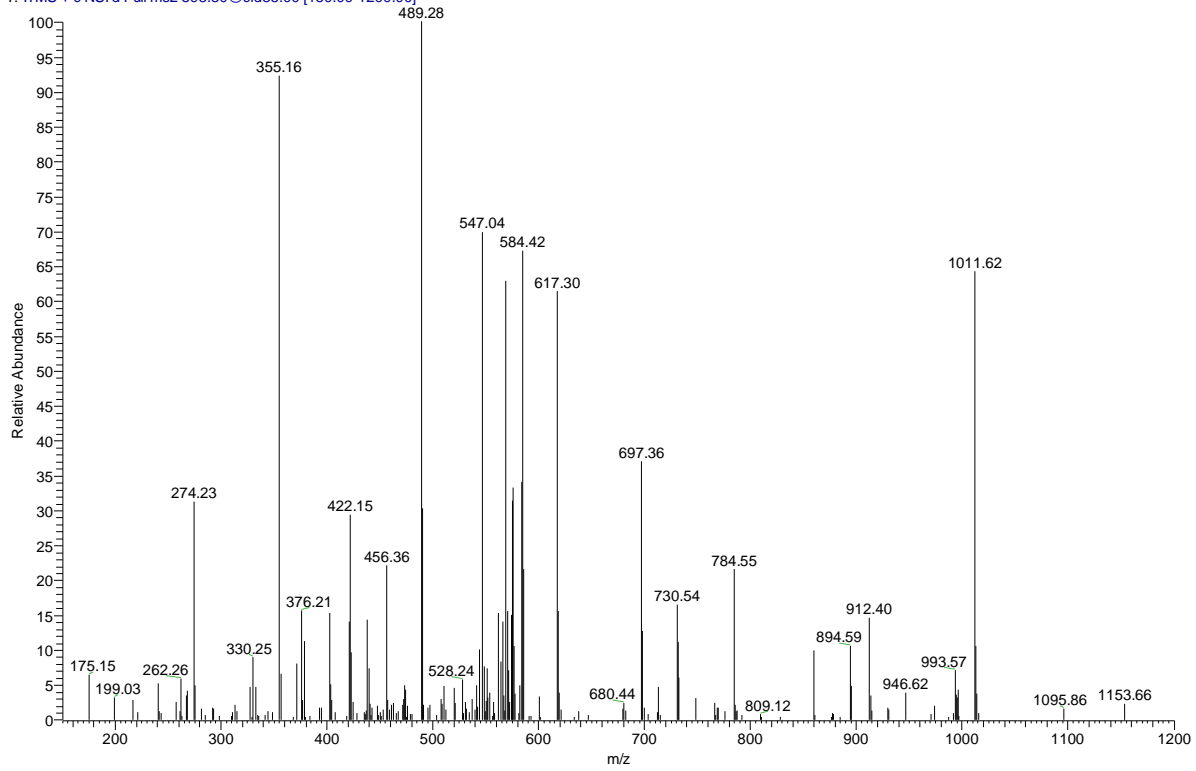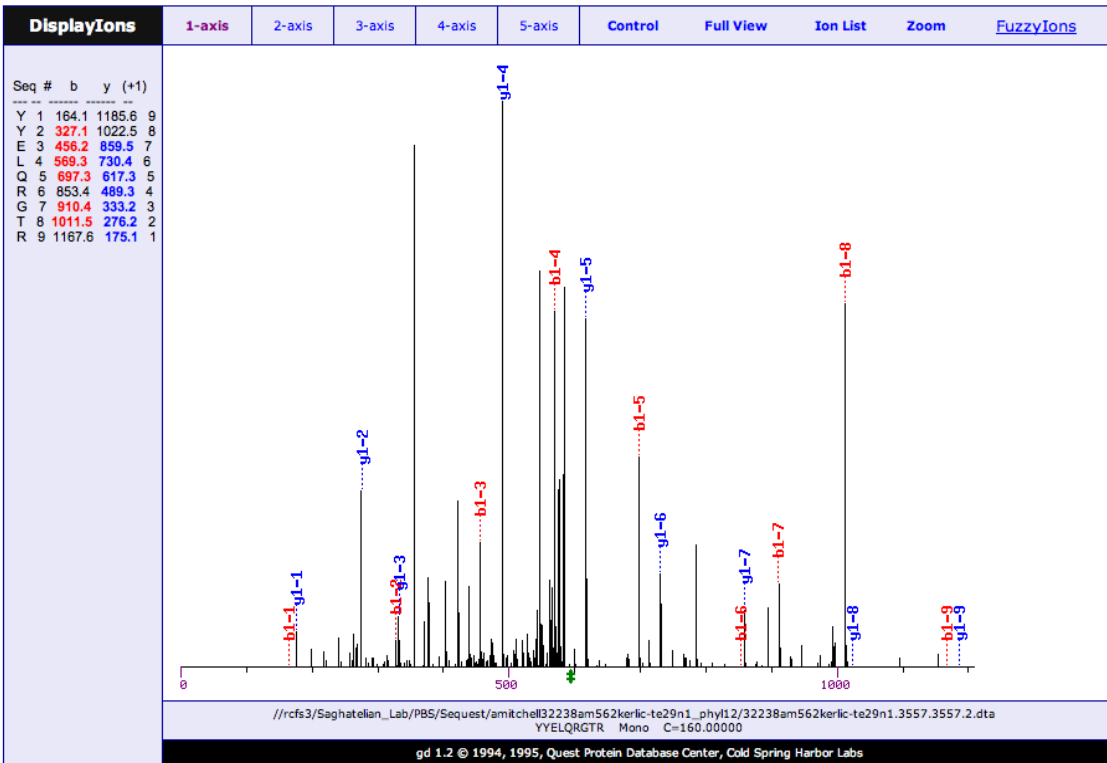

GEMERGEIK Sf: .81

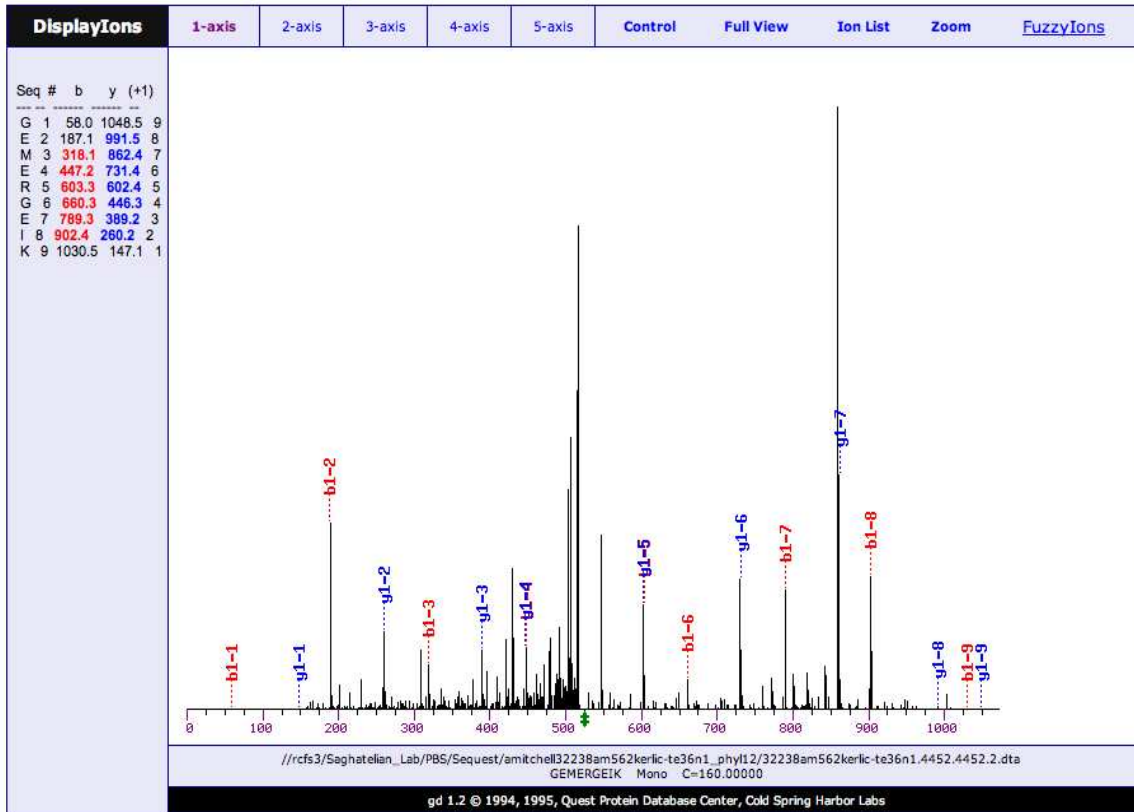

32238am562kerlic-te36n1 #4452 RT: 67.96 AV: 1 NL: 2.19E3  
T: ITMS + c NSI d Full ms2 524.75@cid35.00 [130.00-1060.00]

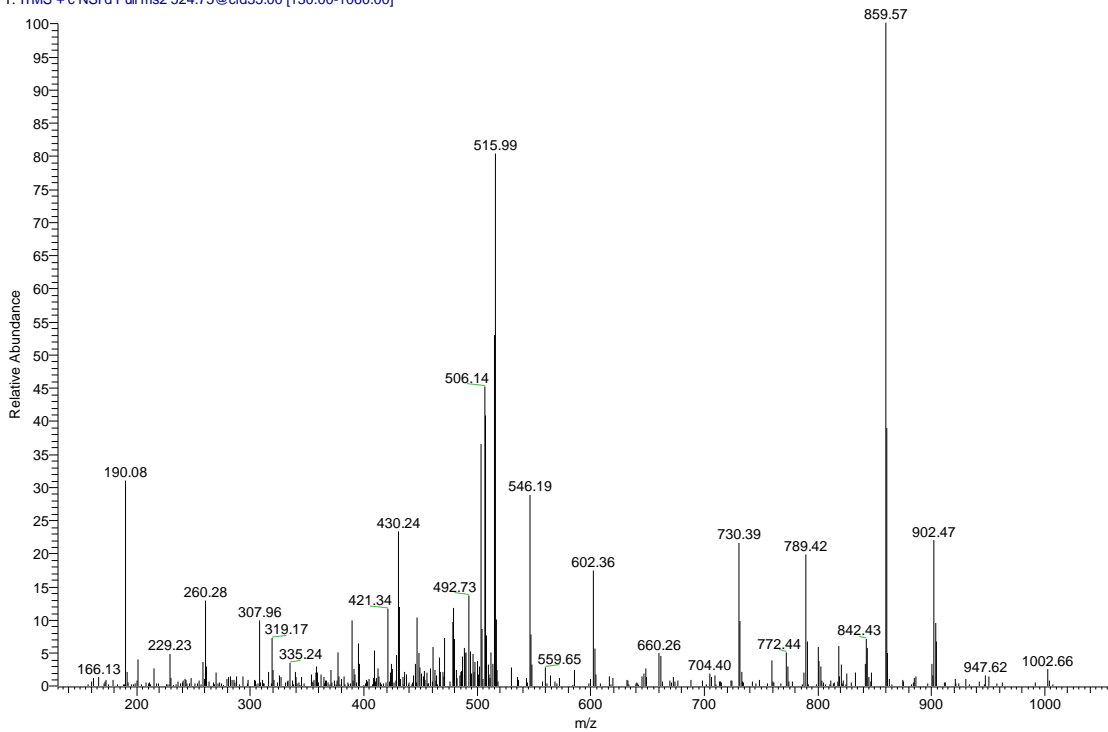

# CQDILEAGKR Sf: .85

32238am562kerlic-te36n1 #5788 RT: 84.11 AV: 1 NL: 4.21E3  
 T: ITMS + c NSI d Full ms2 595.30@cid35.00 [150.00-1205.00]

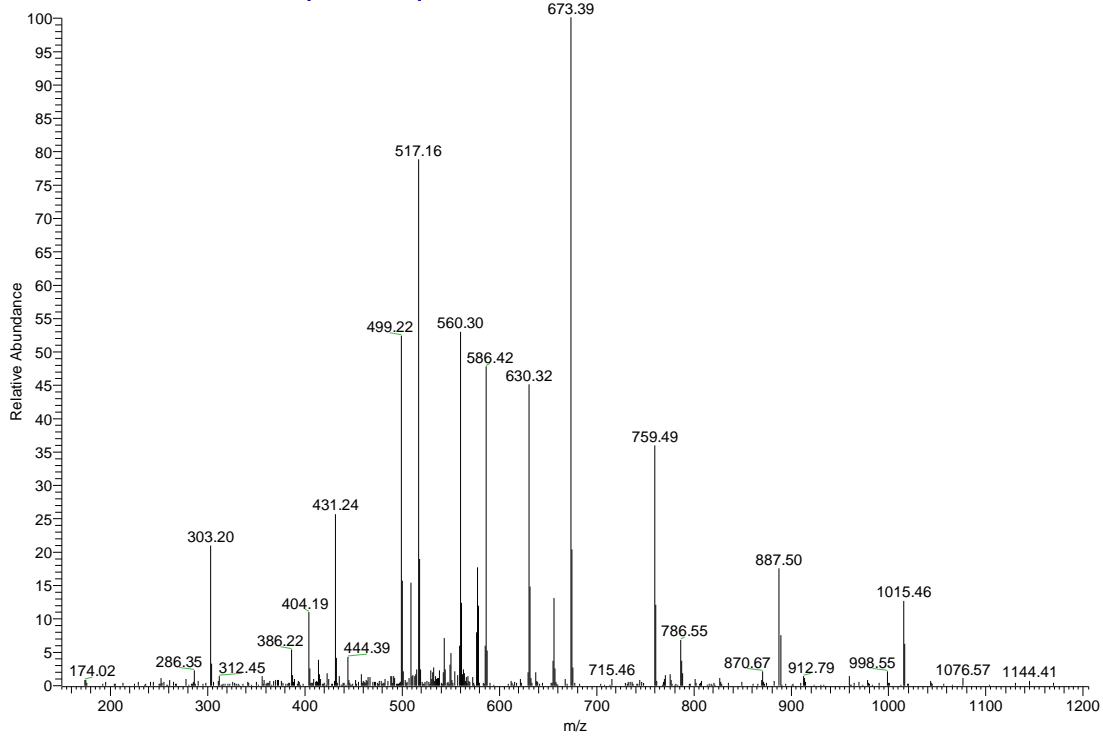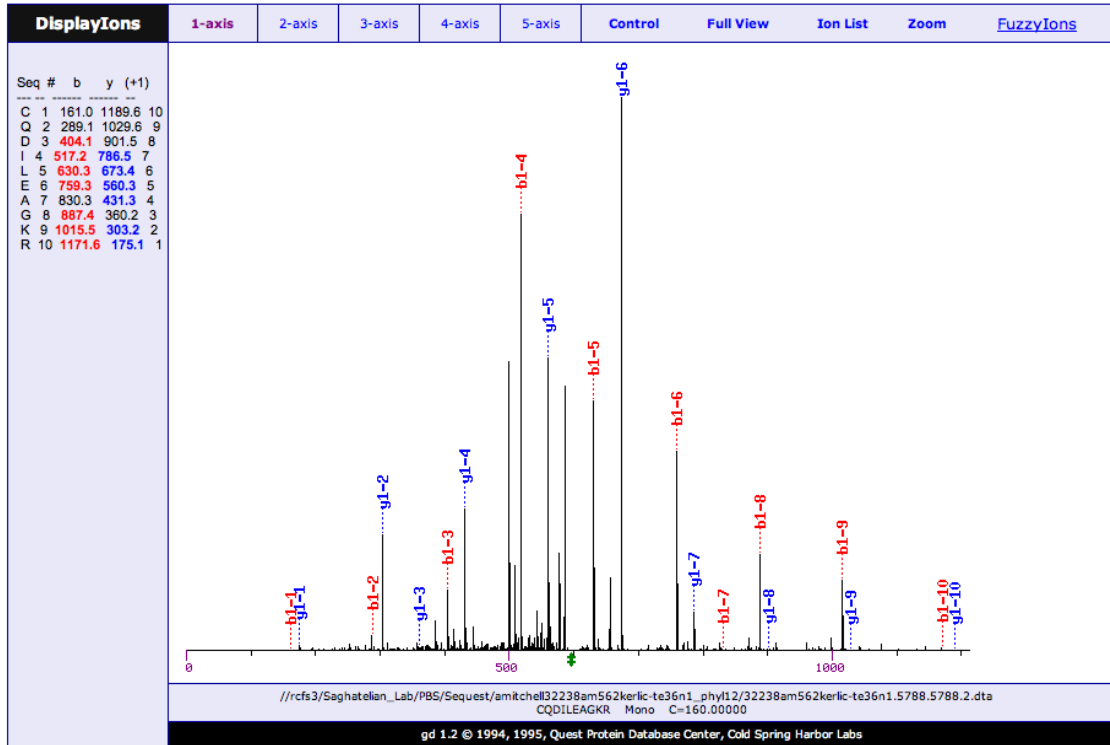

# DLGSPMLK Sf: .76



32238am562kerlic-te09n1 #5753 RT: 68.44 AV: 1 NL: 2.97E4  
 T: ITMS + c NSI d Full ms2 430.73@cid35.00 [105.00-1305.00]

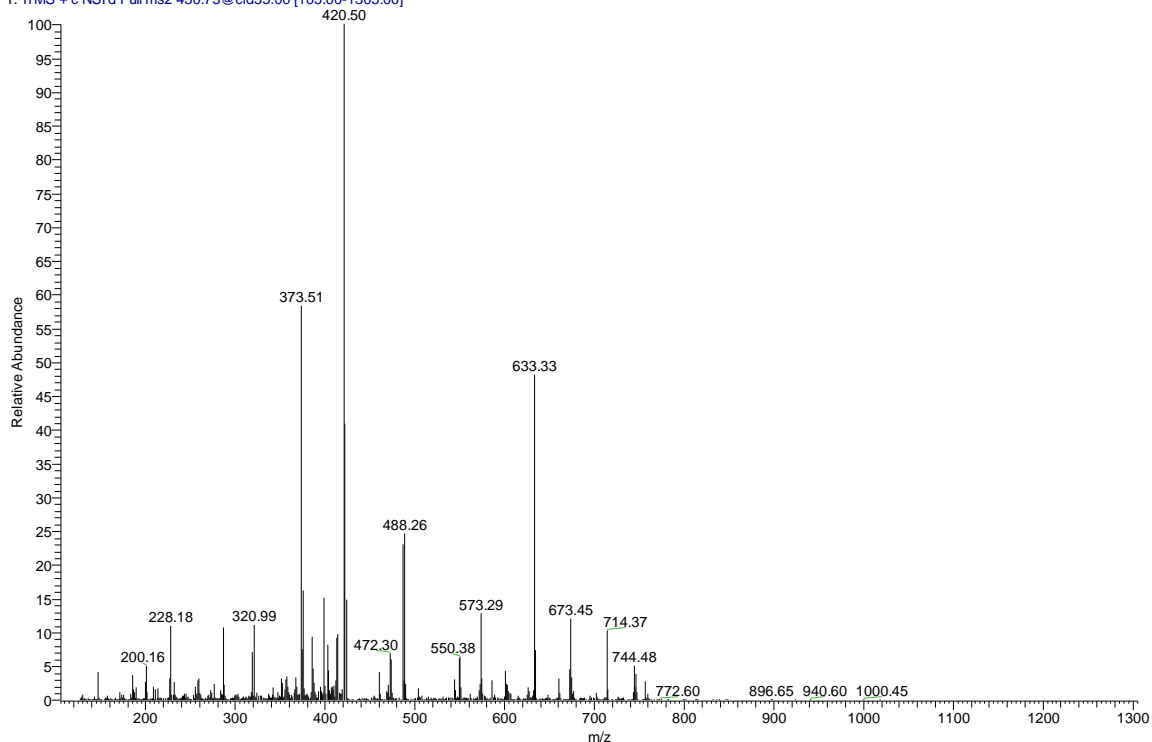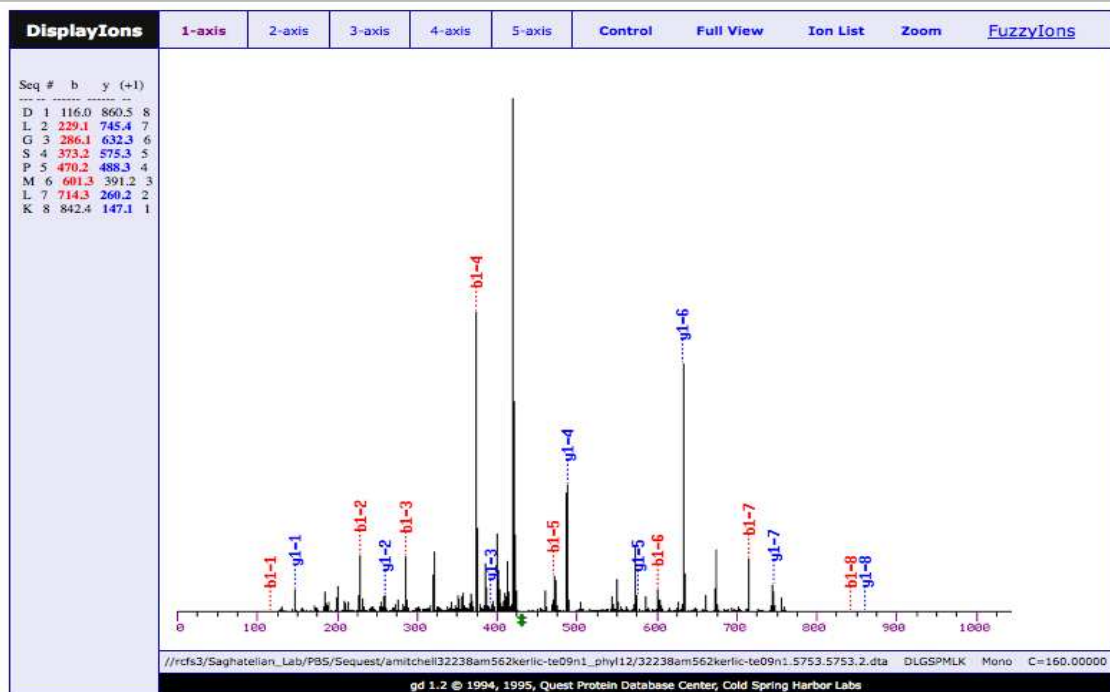

TASPYSRPE Sf: .75

32238am562kerlic-te35n2 #2712 RT: 44.49 AV: 1 NL: 1.43E3  
 T: ITMS + c NSI d Full ms2 504.24@cid35.00 [125.00-1020.00]

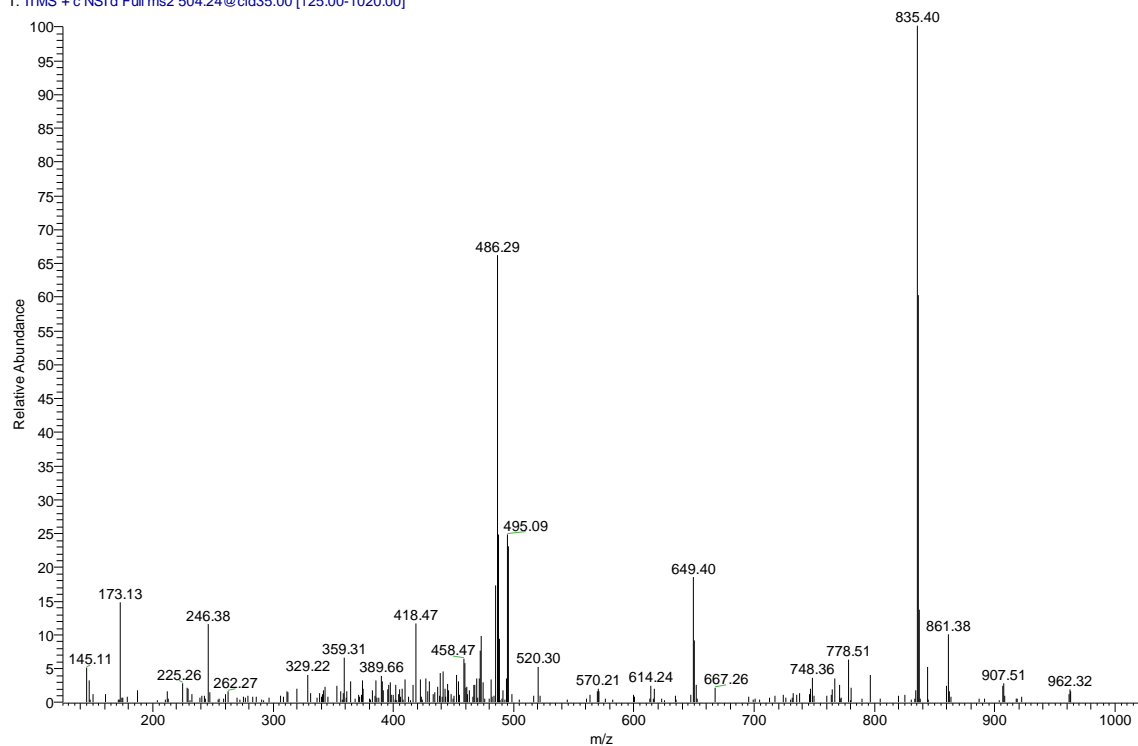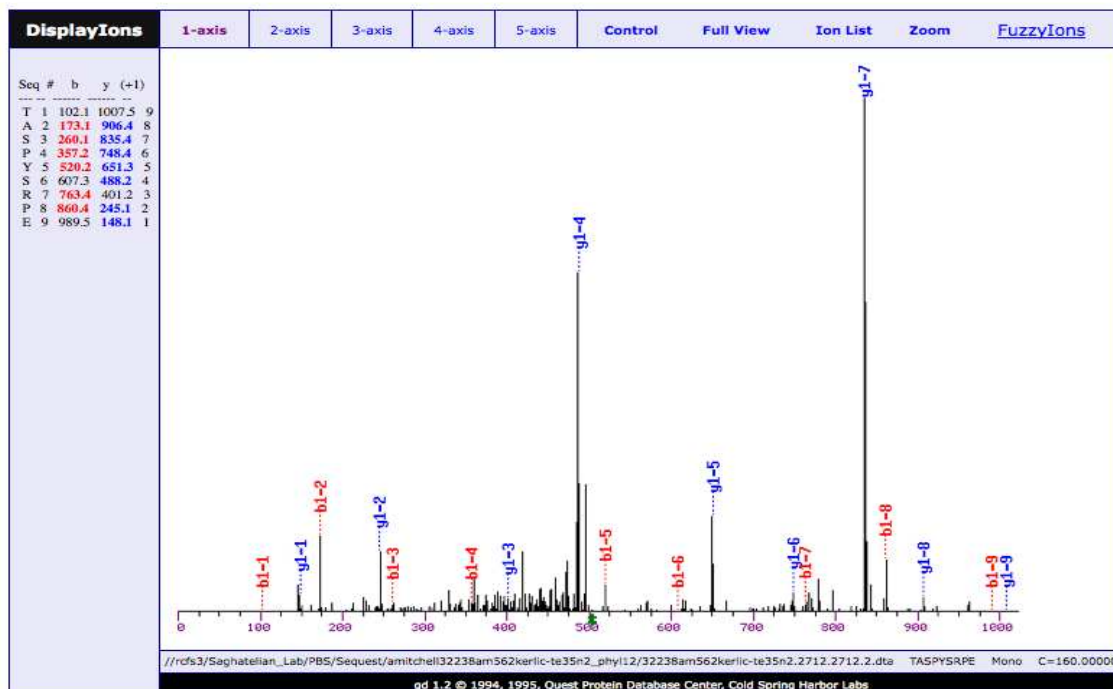

LTVAGQGR Sf: .75

32238am562kerlic-te11n3 #2765 RT: 41.95 AV: 1 NL: 2.47E3  
 T: ITMS + c NSI d Full ms2 401.23@cid35.00 [100.00-815.00]

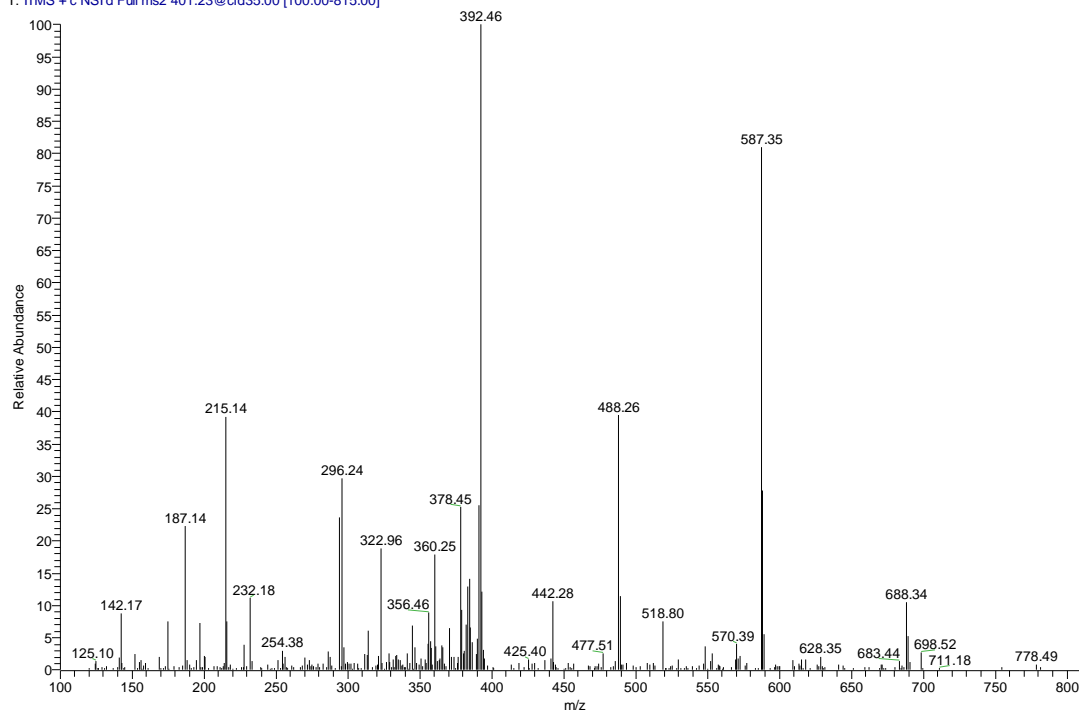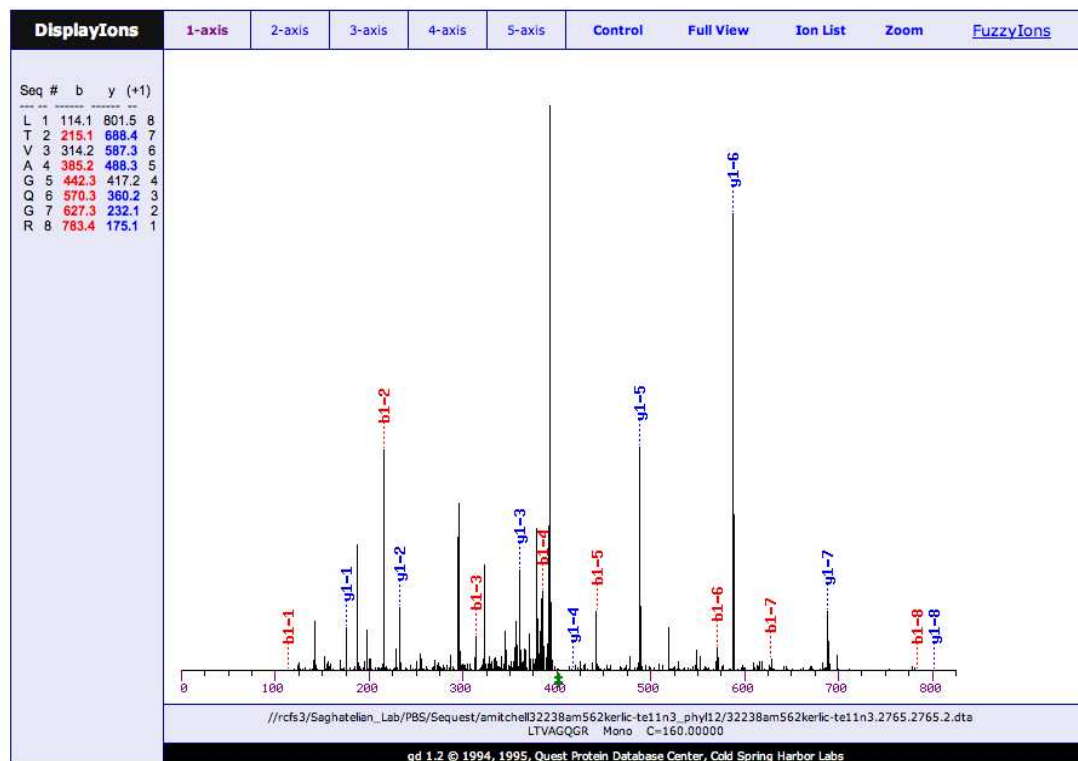

SPFWAGQQR Sf: .85

32238am562kerlic-te35n3 #4461 RT: 63.43 AV: 1 NL: 1.12E3  
 T: ITMS + c NSI d Full ms2 610.78@cid35.00 [155.00-1235.00]

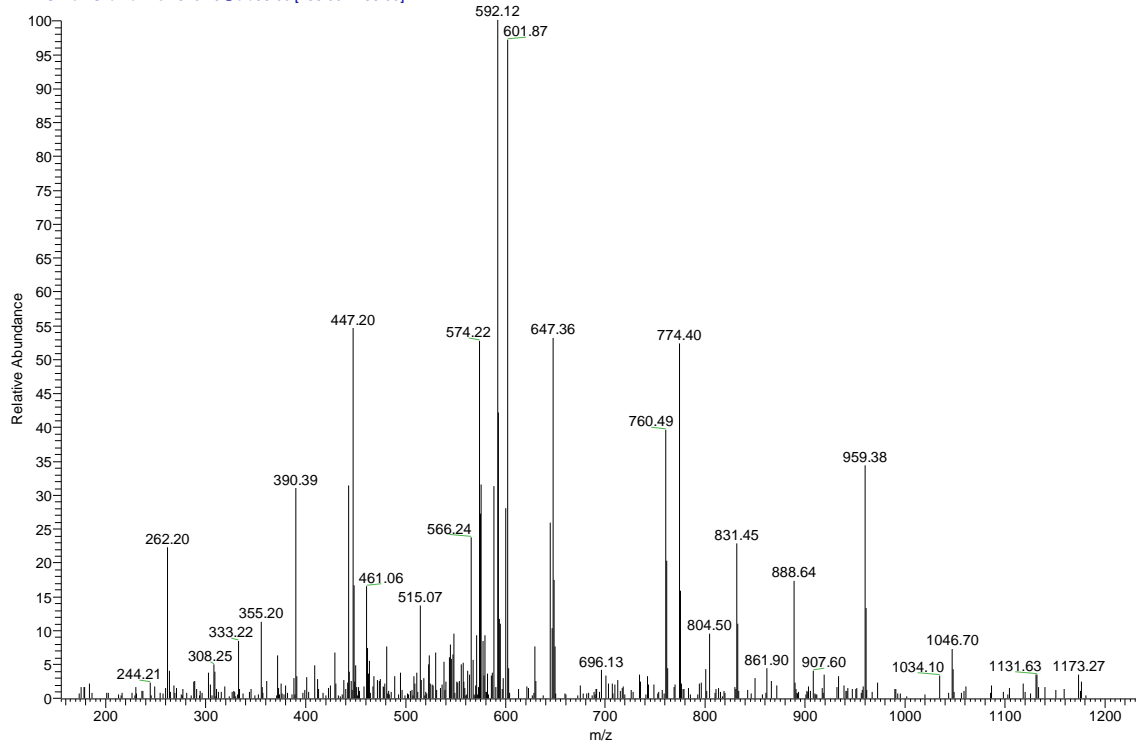

| DisplayIons                                                                                                                                                                                                                                                                 | 1-axis | 2-axis | 3-axis | 4-axis | 5-axis | Control | Full View | Ion List | Zoom | FuzzyIons |
|-----------------------------------------------------------------------------------------------------------------------------------------------------------------------------------------------------------------------------------------------------------------------------|--------|--------|--------|--------|--------|---------|-----------|----------|------|-----------|
| <pre> Seq #  b  y (+1) ---  -  -  - S 1  88.0 1220.6 11 P 2  185.1 1133.5 10 F 3  332.2 1036.5 9 W 4  518.2 889.4 8 A 5  589.3 703.3 7 G 6  646.3 632.3 6 Q 7  774.4 575.3 5 G 8  831.4 447.2 4 Q 9  959.4 390.2 3 S 10 1046.5 262.2 2 R 11 1202.6 175.1 1           </pre> |        |        |        |        |        |         |           |          |      |           |
| <p>//rfs3/Saghatelian_Lab/PBS/Sequest/amitchell/32238am562kerlic-te35n3_phy112/32238am562kerlic-te35n3.4461.4461.2.dta SPFWAGQGQR Mono C=160.00000</p> <p>gd 1.2 © 1994, 1995, Quest Protein Database Center, Cold Spring Harbor Labs</p>                                   |        |        |        |        |        |         |           |          |      |           |

# NLAGGSLIP Sf: .76

32238am562kerlic-te06n1 #5218 RT: 66.46 AV: 1 NL: 3.02E4  
 T: ITMS + c NSI.d Full ms2 449.75@cid35.00 [110.00-910.00]

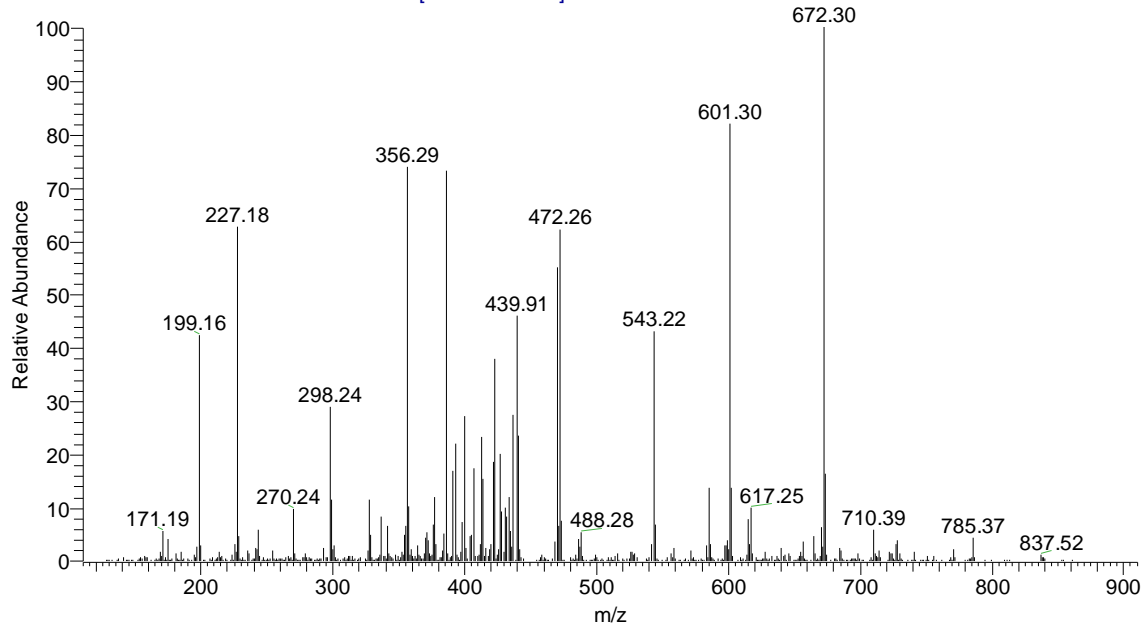

| DisplayIons        | 1-axis | 2-axis | 3-axis | 4-axis | 5-axis | Control | Full View | Ion List | Zoom | FuzzyIons |
|--------------------|--------|--------|--------|--------|--------|---------|-----------|----------|------|-----------|
| Seq # b y (+1)     |        |        |        |        |        |         |           |          |      |           |
| N 1 115.1 898.5 10 |        |        |        |        |        |         |           |          |      |           |
| L 2 228.1 784.5 9  |        |        |        |        |        |         |           |          |      |           |
| A 3 299.2 671.4 8  |        |        |        |        |        |         |           |          |      |           |
| G 4 356.2 600.3 7  |        |        |        |        |        |         |           |          |      |           |
| S 5 413.2 543.3 6  |        |        |        |        |        |         |           |          |      |           |
| G 6 500.2 486.3 5  |        |        |        |        |        |         |           |          |      |           |
| L 7 557.3 399.3 4  |        |        |        |        |        |         |           |          |      |           |
| L 8 670.4 342.2 3  |        |        |        |        |        |         |           |          |      |           |
| I 9 783.4 229.2 2  |        |        |        |        |        |         |           |          |      |           |
| P 10 880.5 116.1 1 |        |        |        |        |        |         |           |          |      |           |

//rcfs3/Saghatelian\_Lab/PBS/Sequest/amitchell32238am562kerlic-te06n1\_phyl12/32238am562kerlic-te06n1.5218.5218.2.dta  
 NLAGGSLIP Mono C=160.00000

gd 1.2 © 1994, 1995, Quest Protein Database Center, Cold Spring Harbor Labs

AAALQFDLR Sf: .94

32238am562kerlic-te09n1 #8168 RT: 87.90 AV: 1 NL: 4.45E4  
 T: ITMS + c NSI d Full ms2 504.28@cid35.00 [125.00-1020.00]

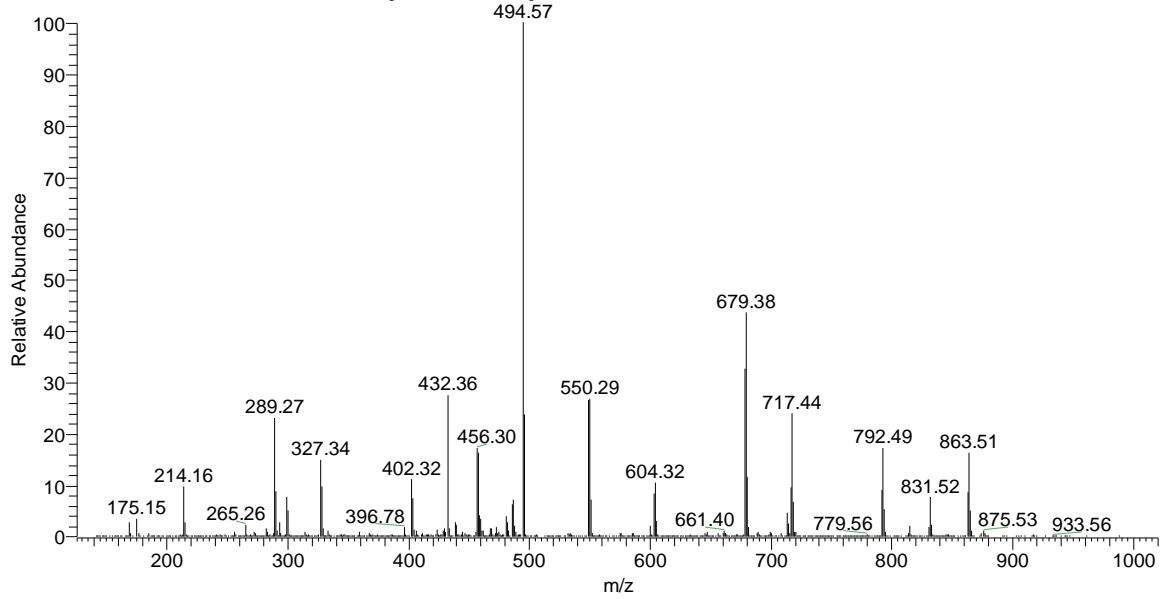

| DisplayIons                                                                                                                                                                                                                                                                                                                                                                                                                                                                                                                                                                          | 1-axis | 2-axis | 3-axis | 4-axis | 5-axis | Control | Full View | Ion List | Zoom  | FuzzyIons |       |       |     |       |       |     |       |       |     |       |       |     |       |       |     |       |       |     |       |       |  |  |  |  |  |  |  |  |  |  |
|--------------------------------------------------------------------------------------------------------------------------------------------------------------------------------------------------------------------------------------------------------------------------------------------------------------------------------------------------------------------------------------------------------------------------------------------------------------------------------------------------------------------------------------------------------------------------------------|--------|--------|--------|--------|--------|---------|-----------|----------|-------|-----------|-------|-------|-----|-------|-------|-----|-------|-------|-----|-------|-------|-----|-------|-------|-----|-------|-------|-----|-------|-------|--|--|--|--|--|--|--|--|--|--|
| <table border="1"> <thead> <tr> <th>Seq #</th> <th>b</th> <th>y (+1)</th> </tr> </thead> <tbody> <tr><td>A 1</td><td>72.0</td><td>1004.6</td></tr> <tr><td>A 2</td><td>143.1</td><td>933.5</td></tr> <tr><td>A 3</td><td>214.1</td><td>862.5</td></tr> <tr><td>L 4</td><td>327.2</td><td>791.4</td></tr> <tr><td>Q 5</td><td>455.3</td><td>678.4</td></tr> <tr><td>F 6</td><td>602.3</td><td>550.3</td></tr> <tr><td>D 7</td><td>717.4</td><td>403.2</td></tr> <tr><td>L 8</td><td>830.4</td><td>288.2</td></tr> <tr><td>R 9</td><td>986.5</td><td>175.1</td></tr> </tbody> </table> | Seq #  | b      | y (+1) | A 1    | 72.0   | 1004.6  | A 2       | 143.1    | 933.5 | A 3       | 214.1 | 862.5 | L 4 | 327.2 | 791.4 | Q 5 | 455.3 | 678.4 | F 6 | 602.3 | 550.3 | D 7 | 717.4 | 403.2 | L 8 | 830.4 | 288.2 | R 9 | 986.5 | 175.1 |  |  |  |  |  |  |  |  |  |  |
| Seq #                                                                                                                                                                                                                                                                                                                                                                                                                                                                                                                                                                                | b      | y (+1) |        |        |        |         |           |          |       |           |       |       |     |       |       |     |       |       |     |       |       |     |       |       |     |       |       |     |       |       |  |  |  |  |  |  |  |  |  |  |
| A 1                                                                                                                                                                                                                                                                                                                                                                                                                                                                                                                                                                                  | 72.0   | 1004.6 |        |        |        |         |           |          |       |           |       |       |     |       |       |     |       |       |     |       |       |     |       |       |     |       |       |     |       |       |  |  |  |  |  |  |  |  |  |  |
| A 2                                                                                                                                                                                                                                                                                                                                                                                                                                                                                                                                                                                  | 143.1  | 933.5  |        |        |        |         |           |          |       |           |       |       |     |       |       |     |       |       |     |       |       |     |       |       |     |       |       |     |       |       |  |  |  |  |  |  |  |  |  |  |
| A 3                                                                                                                                                                                                                                                                                                                                                                                                                                                                                                                                                                                  | 214.1  | 862.5  |        |        |        |         |           |          |       |           |       |       |     |       |       |     |       |       |     |       |       |     |       |       |     |       |       |     |       |       |  |  |  |  |  |  |  |  |  |  |
| L 4                                                                                                                                                                                                                                                                                                                                                                                                                                                                                                                                                                                  | 327.2  | 791.4  |        |        |        |         |           |          |       |           |       |       |     |       |       |     |       |       |     |       |       |     |       |       |     |       |       |     |       |       |  |  |  |  |  |  |  |  |  |  |
| Q 5                                                                                                                                                                                                                                                                                                                                                                                                                                                                                                                                                                                  | 455.3  | 678.4  |        |        |        |         |           |          |       |           |       |       |     |       |       |     |       |       |     |       |       |     |       |       |     |       |       |     |       |       |  |  |  |  |  |  |  |  |  |  |
| F 6                                                                                                                                                                                                                                                                                                                                                                                                                                                                                                                                                                                  | 602.3  | 550.3  |        |        |        |         |           |          |       |           |       |       |     |       |       |     |       |       |     |       |       |     |       |       |     |       |       |     |       |       |  |  |  |  |  |  |  |  |  |  |
| D 7                                                                                                                                                                                                                                                                                                                                                                                                                                                                                                                                                                                  | 717.4  | 403.2  |        |        |        |         |           |          |       |           |       |       |     |       |       |     |       |       |     |       |       |     |       |       |     |       |       |     |       |       |  |  |  |  |  |  |  |  |  |  |
| L 8                                                                                                                                                                                                                                                                                                                                                                                                                                                                                                                                                                                  | 830.4  | 288.2  |        |        |        |         |           |          |       |           |       |       |     |       |       |     |       |       |     |       |       |     |       |       |     |       |       |     |       |       |  |  |  |  |  |  |  |  |  |  |
| R 9                                                                                                                                                                                                                                                                                                                                                                                                                                                                                                                                                                                  | 986.5  | 175.1  |        |        |        |         |           |          |       |           |       |       |     |       |       |     |       |       |     |       |       |     |       |       |     |       |       |     |       |       |  |  |  |  |  |  |  |  |  |  |
| //rcfs3/Saghatelian_Lab/PBS/Sequest/amitchell32238am562kerlic-te09n1_phy112/32238am562kerlic-te09n1.8168.8168.2.cta AAALQFDLR Mono C=160.00000<br>gd 1.2 © 1994, 1995, Quest Protein Database Center, Cold Spring Harbor Labs                                                                                                                                                                                                                                                                                                                                                        |        |        |        |        |        |         |           |          |       |           |       |       |     |       |       |     |       |       |     |       |       |     |       |       |     |       |       |     |       |       |  |  |  |  |  |  |  |  |  |  |
